# Supplementary material
Source: publisher figshare collection journal article supplement (https://acs.figshare.com/ndownloader/files/4064167)

## Supporting Information

### **Enantioselective Synthesis of 5,7-Bicyclic Ring Systems from Axially Chiral Allenes Using a Rh(I)-Catalyzed Cyclocarbonylation Reaction**

Francois Grillet and Kay M. Brummond\*

*Department of Chemistry, University of Pittsburgh, Pittsburgh,  
Pennsylvania 15260 USA*

[kbrummon@pitt.edu](mailto:kbrummon@pitt.edu)

## Table of Contents

Synthesis of allene-yne 40.....S3

$^1\text{H}$  and  $^{13}\text{C}$  NMR.....S4 – S77

HPLC and SFC analysis.....S78 – S129

Details of crystal structure determination.....S130 – S131

### Synthesis of allene-yne **40**

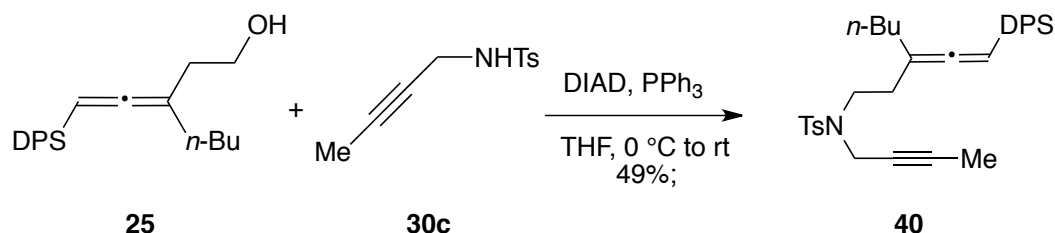

***N*-(but-2-yn-1-yl)-*N*-(3-(2-(dimethyl(phenyl)silyl)vinylidene)heptyl)-4-methyl benzenesulfonamide (**40**)**. Following the general procedure for preparation of allene-yne *via* Mitsunobu reaction, alcohol **25** (54.8 mg, 0.2 mmol) in THF (1.5 mL) was reacted with triphenylphosphine (63 mg, 0.24 mmol), *N*-(but-2-yn-1-yl)-4-methylbenzenesulfonamide<sup>29</sup> **30c** (54 mg, 0.24 mmol) and NaHCO<sub>3</sub> (48  $\mu$ L, 0.24 mmol) for 2.5 h. Purification of the crude residue by silica gel chromatography using 5% Et<sub>2</sub>O/hexanes afforded compound **40** (46.7 mg, 49%) as a colorless oil. <sup>1</sup>H NMR (600 MHz, CDCl<sub>3</sub>)  $\delta$  7.74 (d, *J* = 8.1 Hz, 2H), 7.57 (d, *J* = 5.0 Hz, 2H), 7.39 – 7.37 (m, 3H), 7.29 (d, *J* = 7.4 Hz, 2H), 5.15 – 5.14 (m, 1H), 4.09 (d, *J* = 2.6 Hz, 2H), 3.24 (t, *J* = 8.0 Hz, 2H), 2.44 (s, 3H), 2.22 – 2.20 (m, 2H), 1.96 – 1.95 (m, 2H), 1.56 (t, *J* = 2.3 Hz, 3H), 1.38 – 1.35 (m, 5H), 0.92 (t, *J* = 7.0 Hz, 3H), 0.37 (s, 6H); <sup>13</sup>C NMR (150 MHz, CDCl<sub>3</sub>)  $\delta$  208.9, 143.0, 138.5, 136.0, 133.6 (2C), 129.2 (2C), 129.0, 127.7 (2C), 127.6 (2C), 94.1, 82.9, 81.4, 71.7, 44.9, 37.0, 31.3, 29.8 (2C), 22.4, 21.4, 13.9, 3.2, -2.2, -2.3; IR (thin film) 3395, 3064, 2954, 2860, 2165, 1669, 1593, 1438, 1361, 1254, 1160; HRMS (ES+) C<sub>28</sub>H<sub>36</sub>NO<sub>2</sub>SSi [M-H<sup>+</sup>] Calculated: 478.2236; Found: 478.2238.

# $^1\text{H}$ and $^{13}\text{C}$ NMR

(*R*<sub>a</sub>)-hexa-3,4-dien-1-yl 4-nitrobenzoate (27):

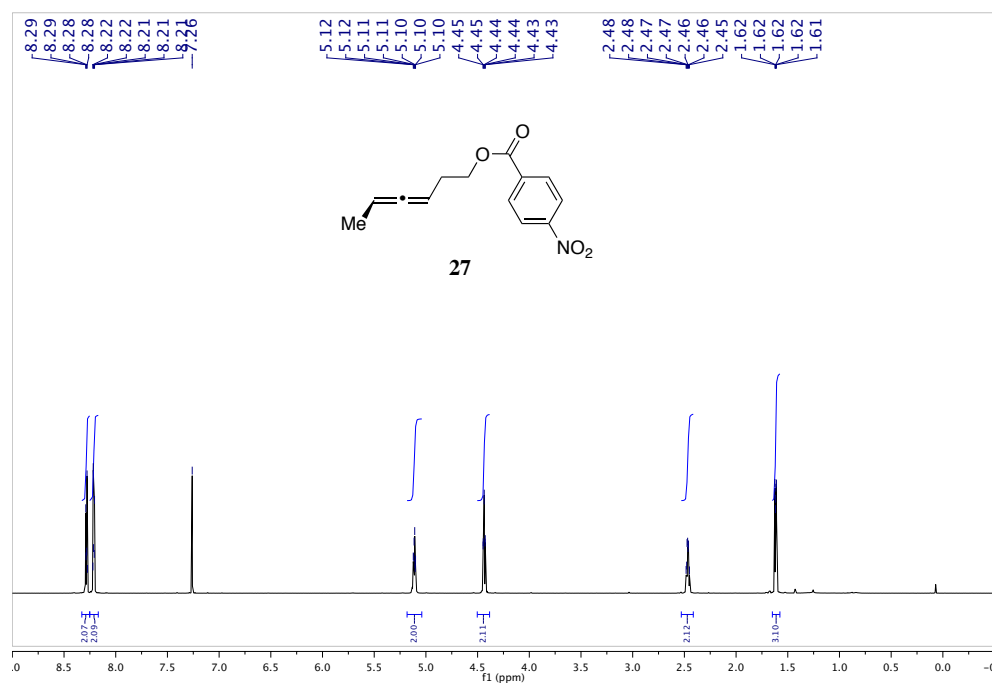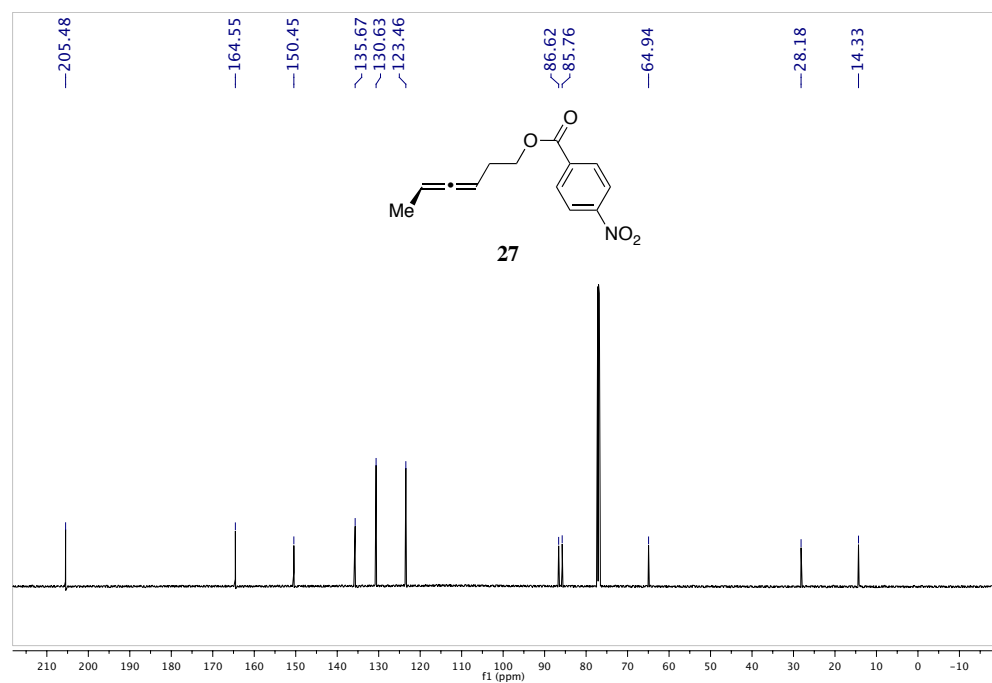



**(*R*<sub>a</sub>)-*N*-(hexa-3,4-dien-1-yl)-4-methyl-*N*-(3-phenylprop-2-yn-1-yl)**

**benzenesulfonamide (17d):**

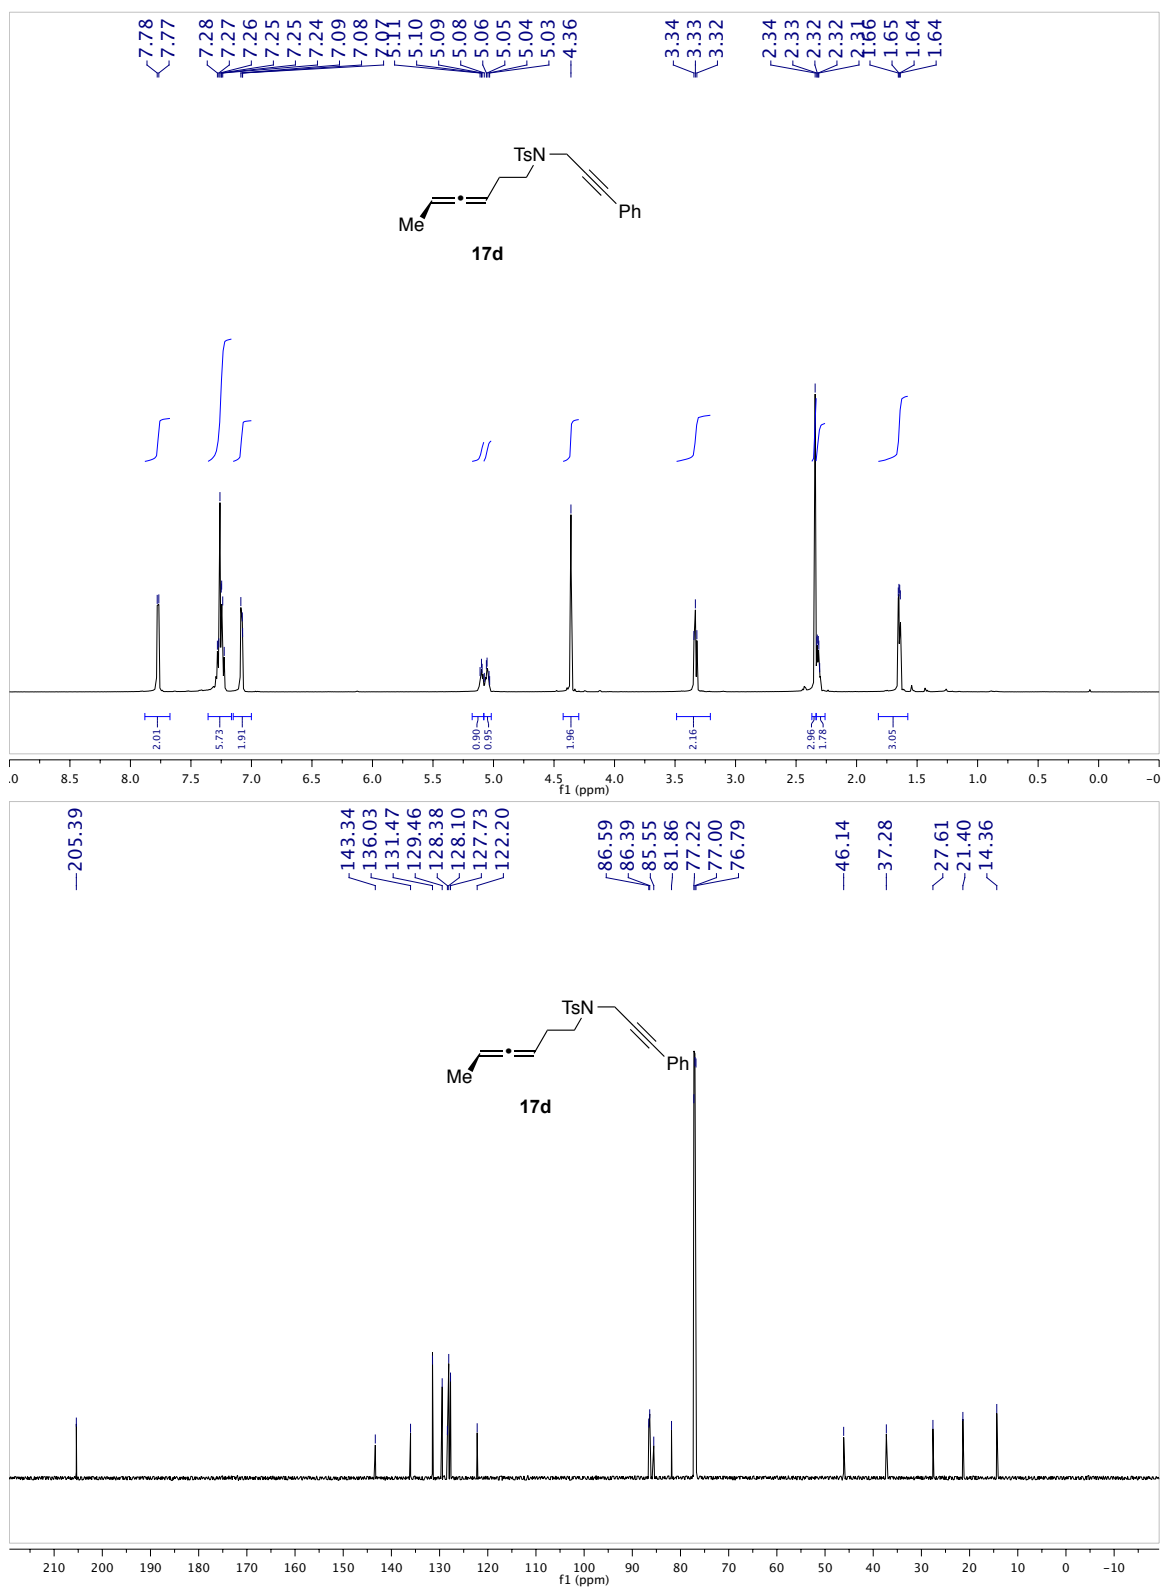

**(S)-6-methyl-8-phenyl-2-tosyl-1,2,3,4-tetrahydrocyclopenta[c]azepin-7(6H)-one (45d):**

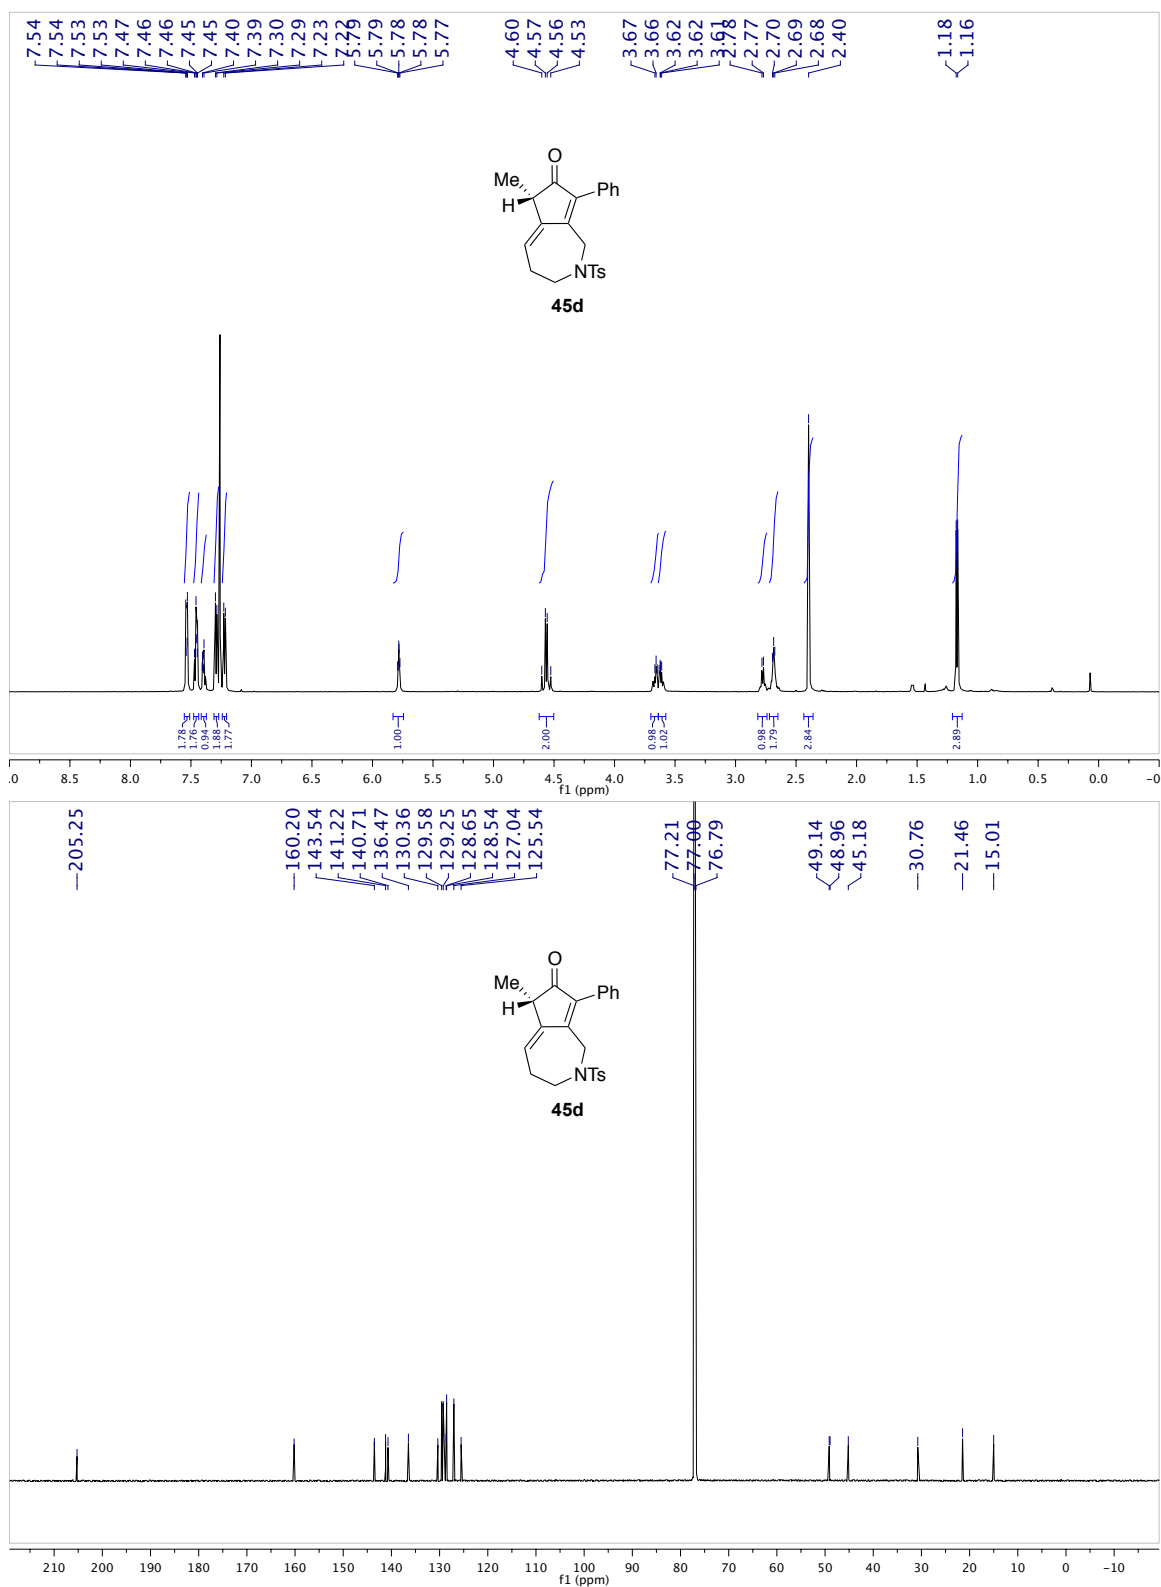

**(*R*<sub>a</sub>)-*N*-(hexa-3,4-dien-1-yl)-4-methyl-*N*-(prop-2-yn-1-yl)benzenesulfonamide**

**(17e):**

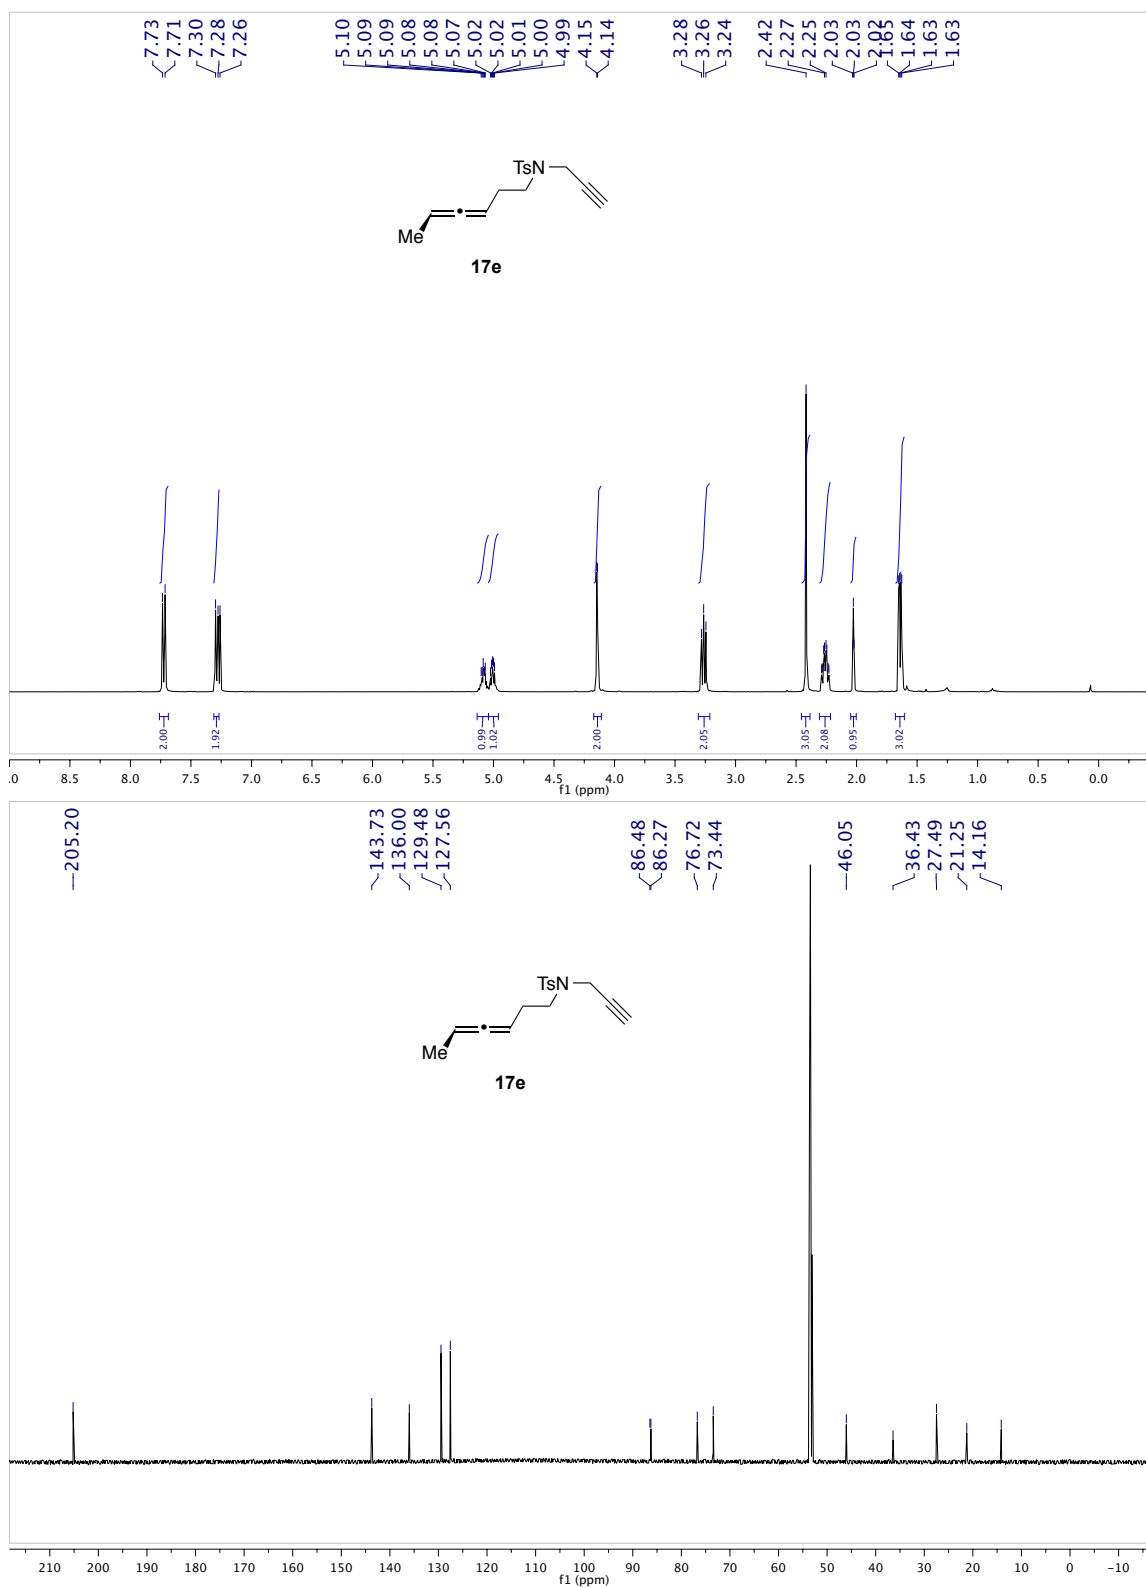

**(*R*<sub>a</sub>)-*N*-(hexa-3,4-dien-1-yl)-4-methyl-*N*-(3-(trimethylsilyl)prop-2-yn-1-yl)**

**benzenesulfonamide (17f):**

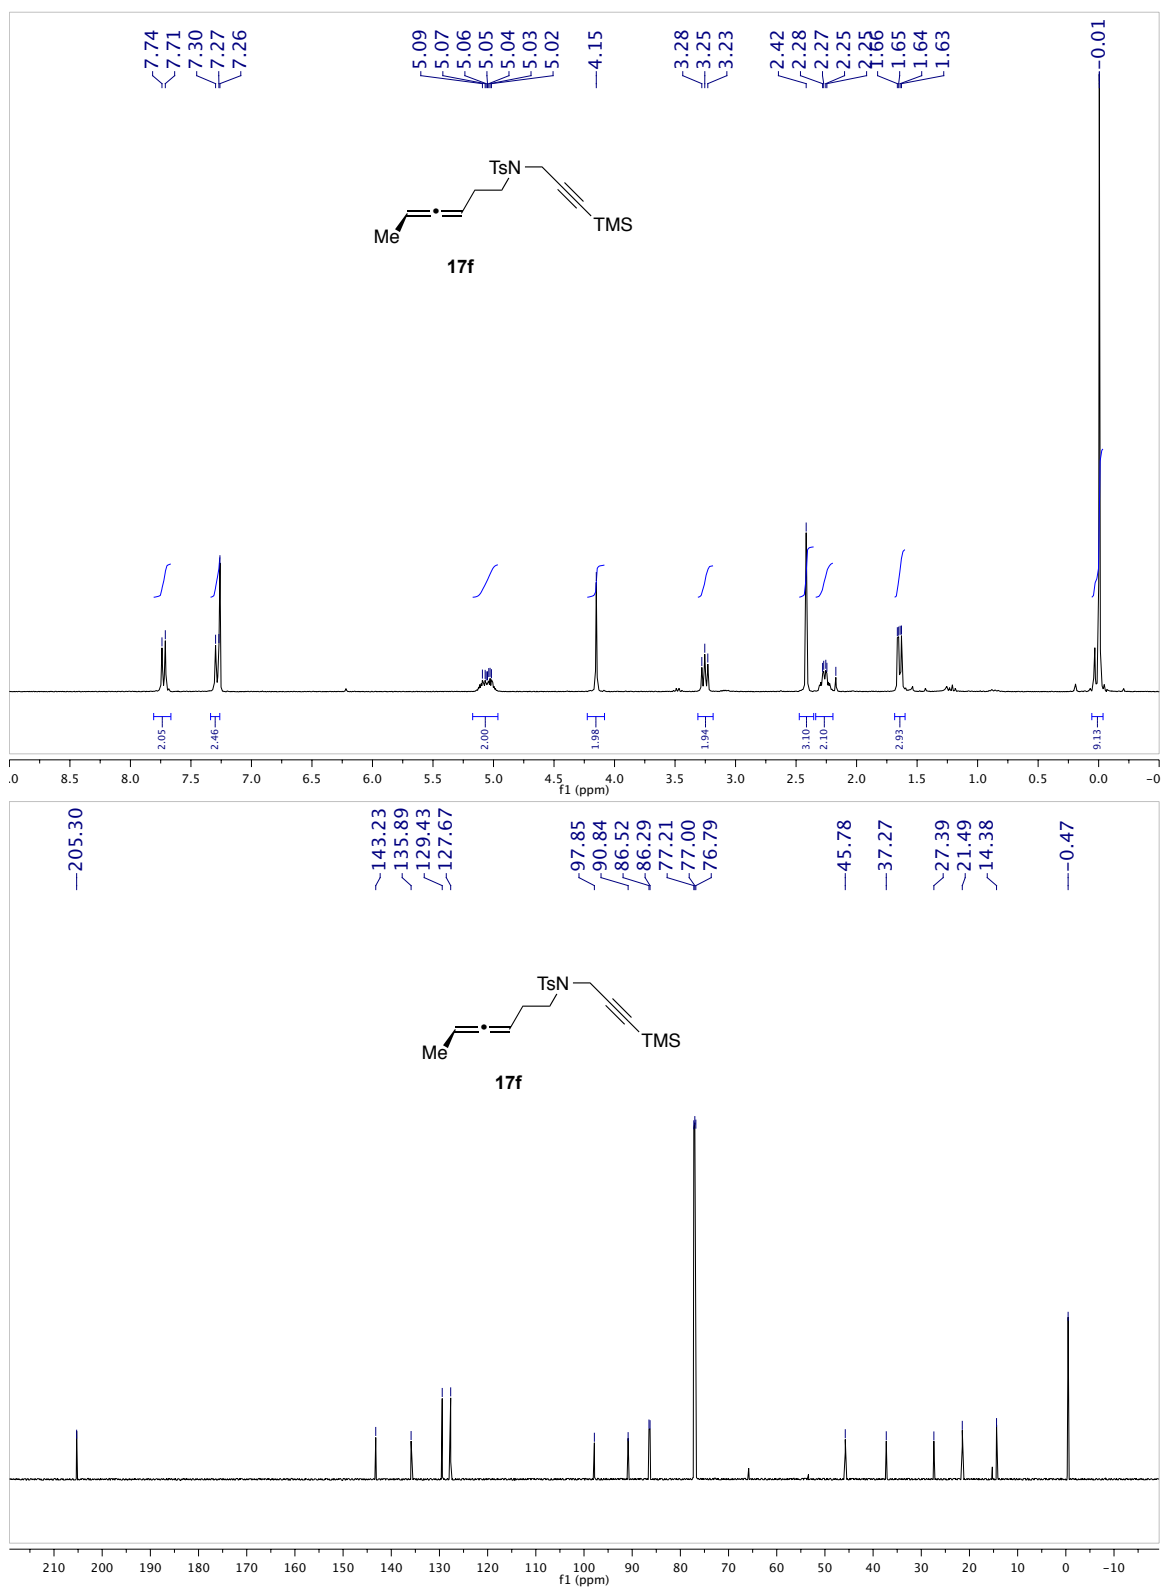

**(S)-6-methyl-2-tosyl-8-(trimethylsilyl)-1,2,3,4-tetrahydrocyclopenta[c]azepin-7(6H)-one (45f):**

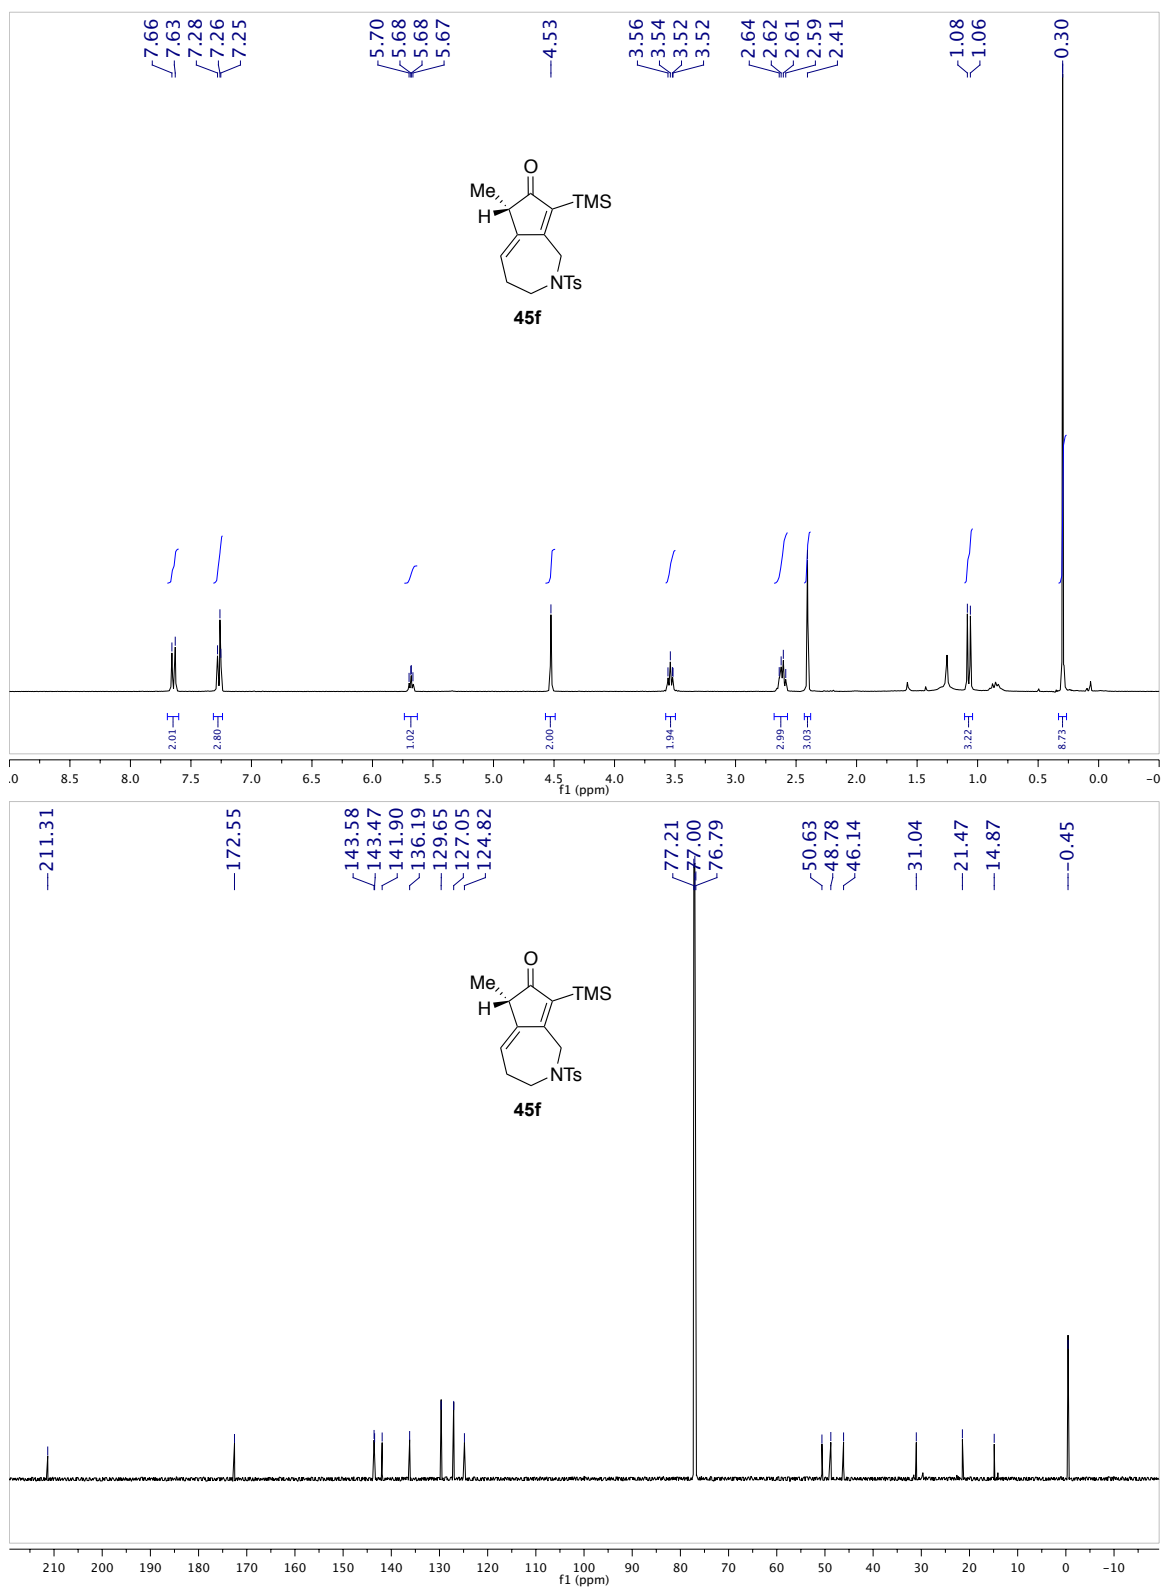

**(*R*<sub>a</sub>)-*N*-(but-2-yn-1-yl)-*N*-(hexa-3,4-dien-1-yl)-4-methylbenzenesulfonamide**

**(17c):**

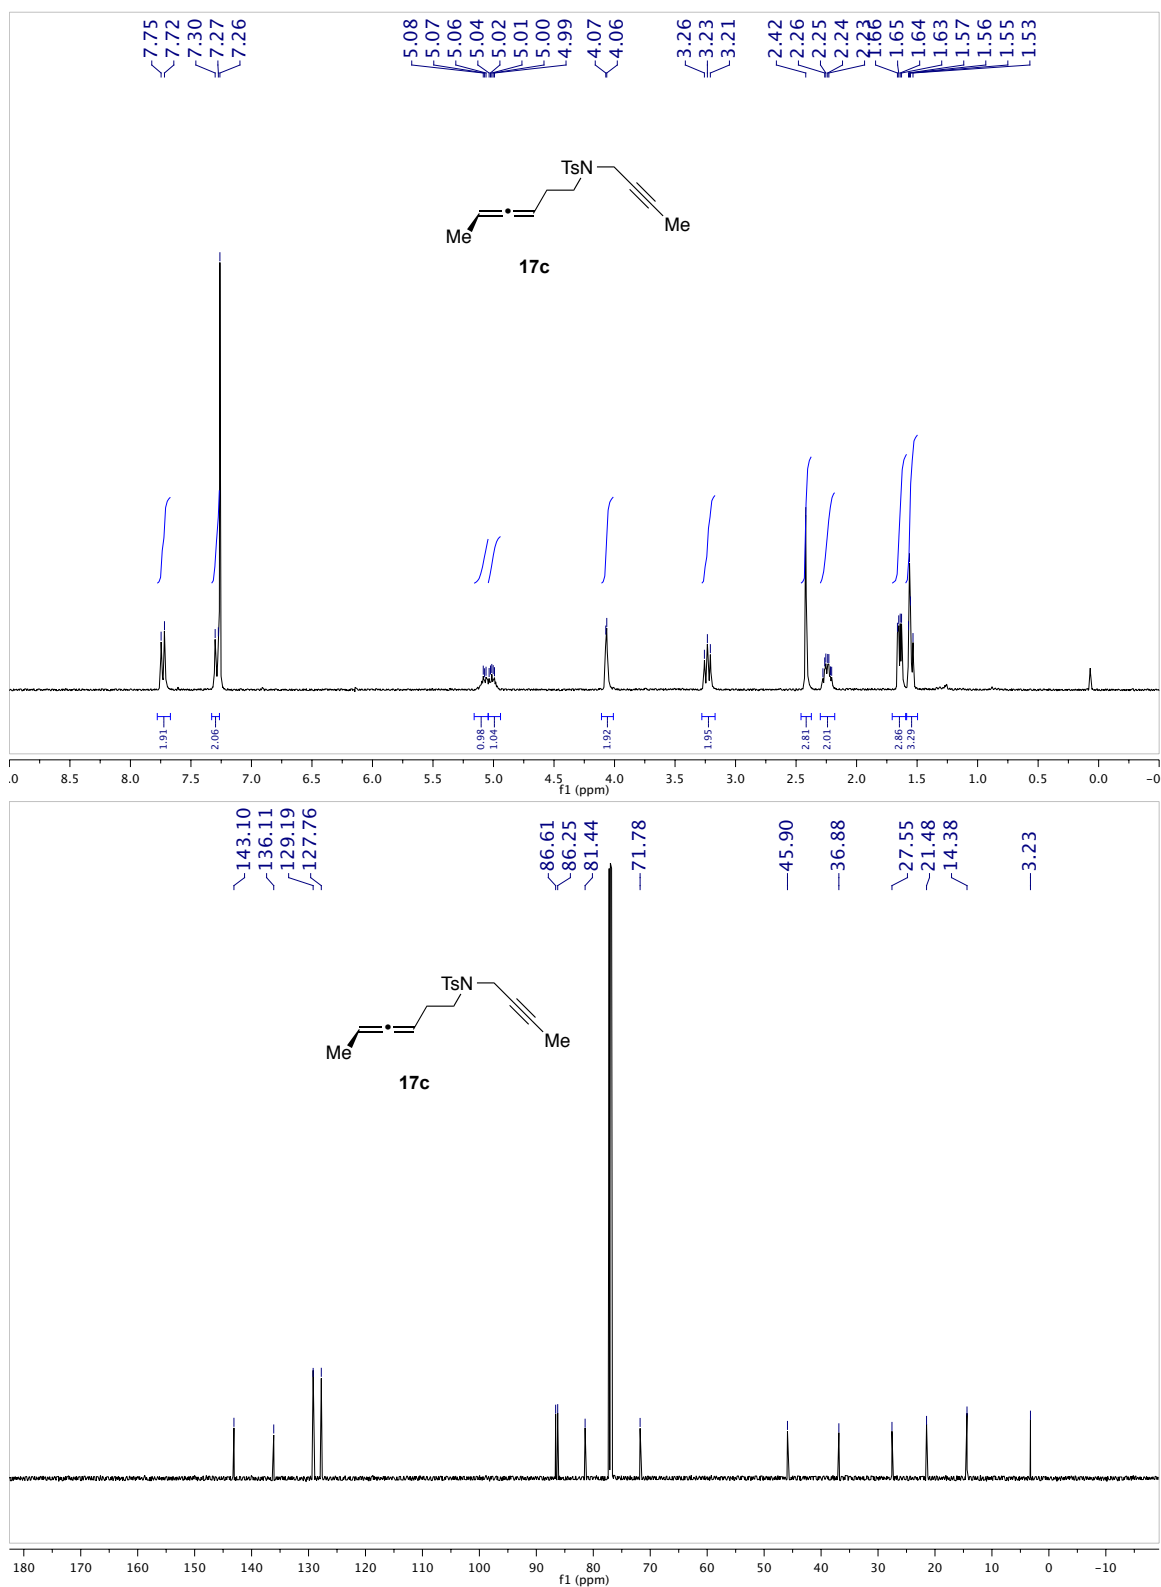

**(S)-6,8-dimethyl-2-tosyl-1,2,3,4-tetrahydrocyclopenta[c]azepin-7(6H)-one**

**(45c):**

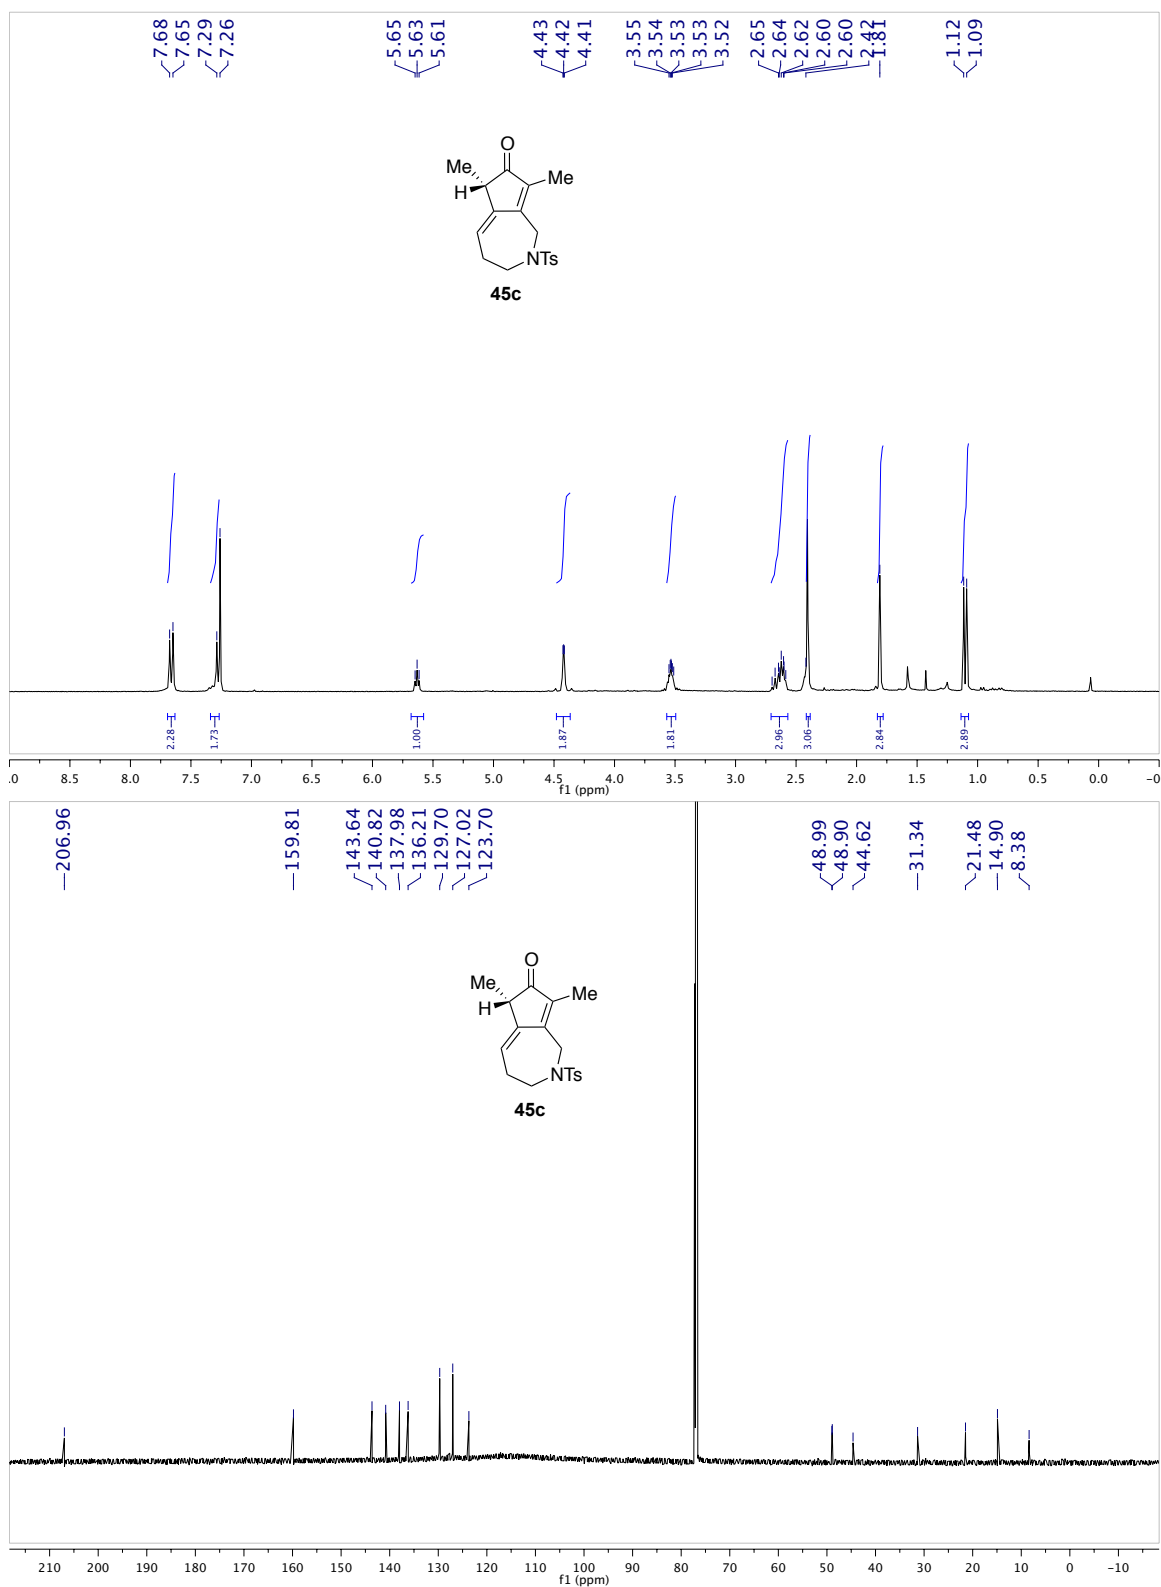

**(*R*<sub>a</sub>)-Hexa-3,4-dien-1-yl methanesulfonate (32):**

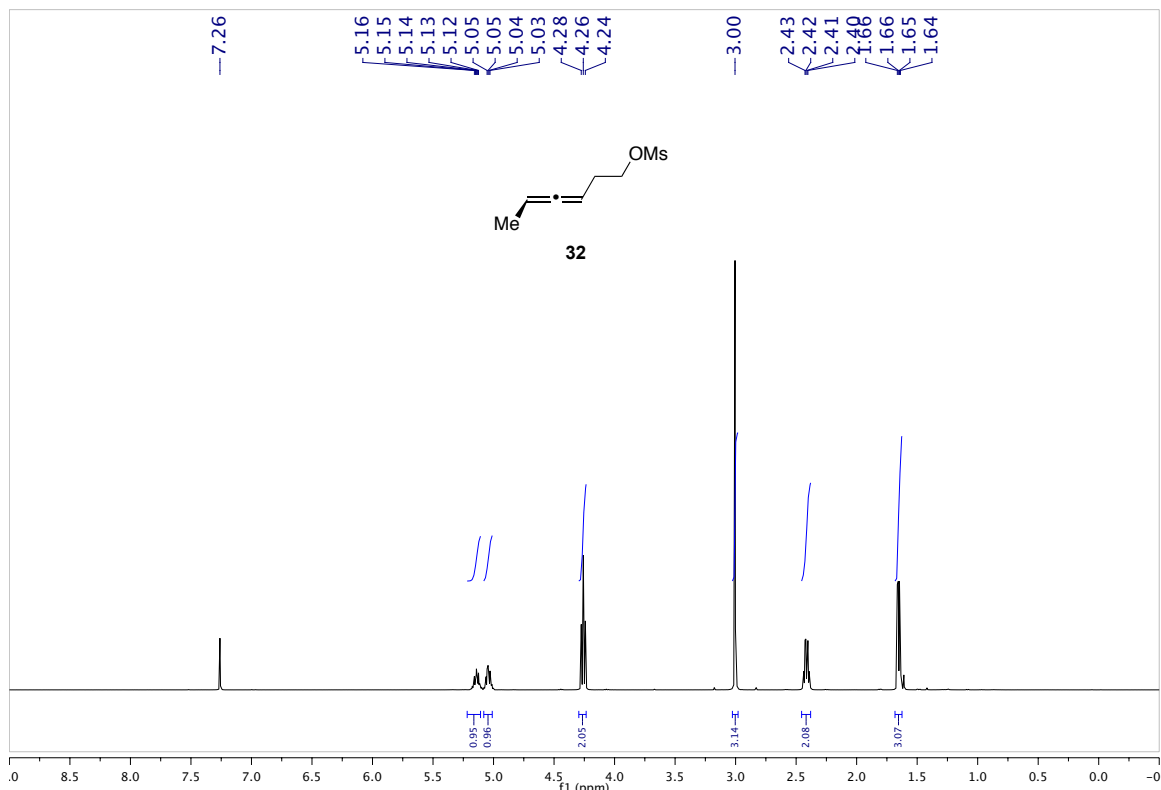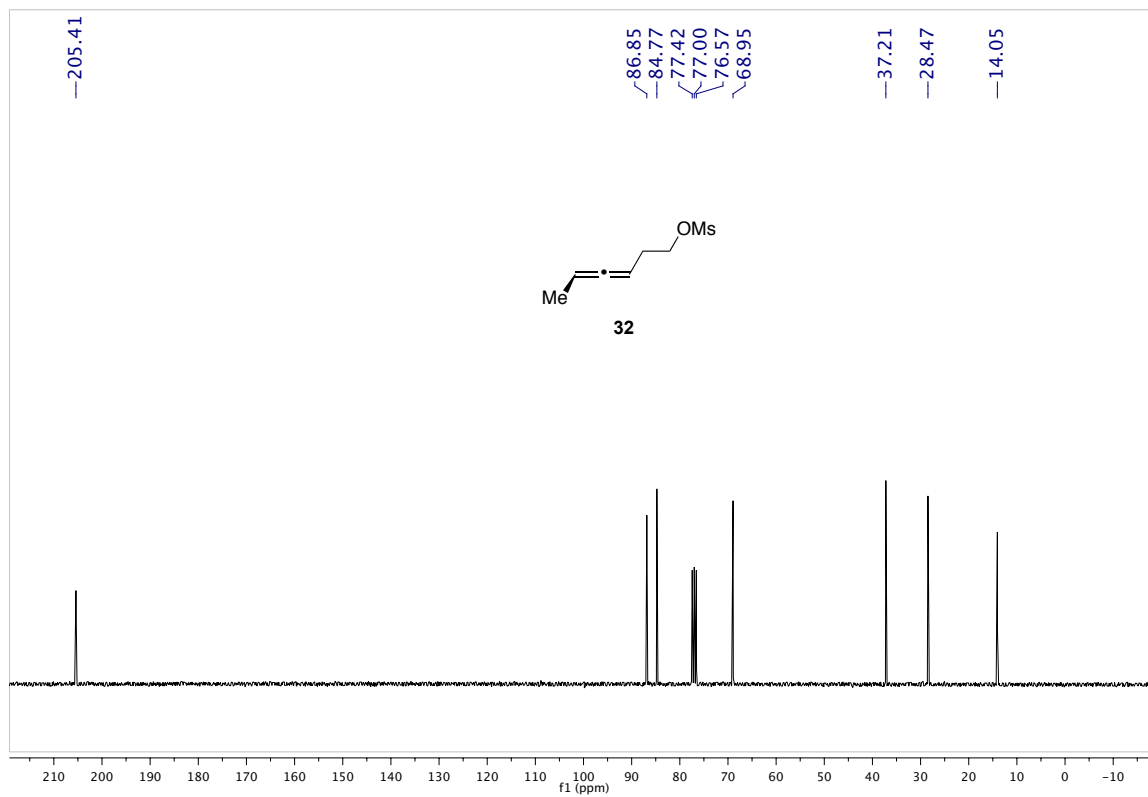



**(*R*<sub>a</sub>)-Diethyl 2-(hexa-3,4-dien-1-yl)-2-(3-phenylprop-2-yn-1-yl)malonate (19d):**

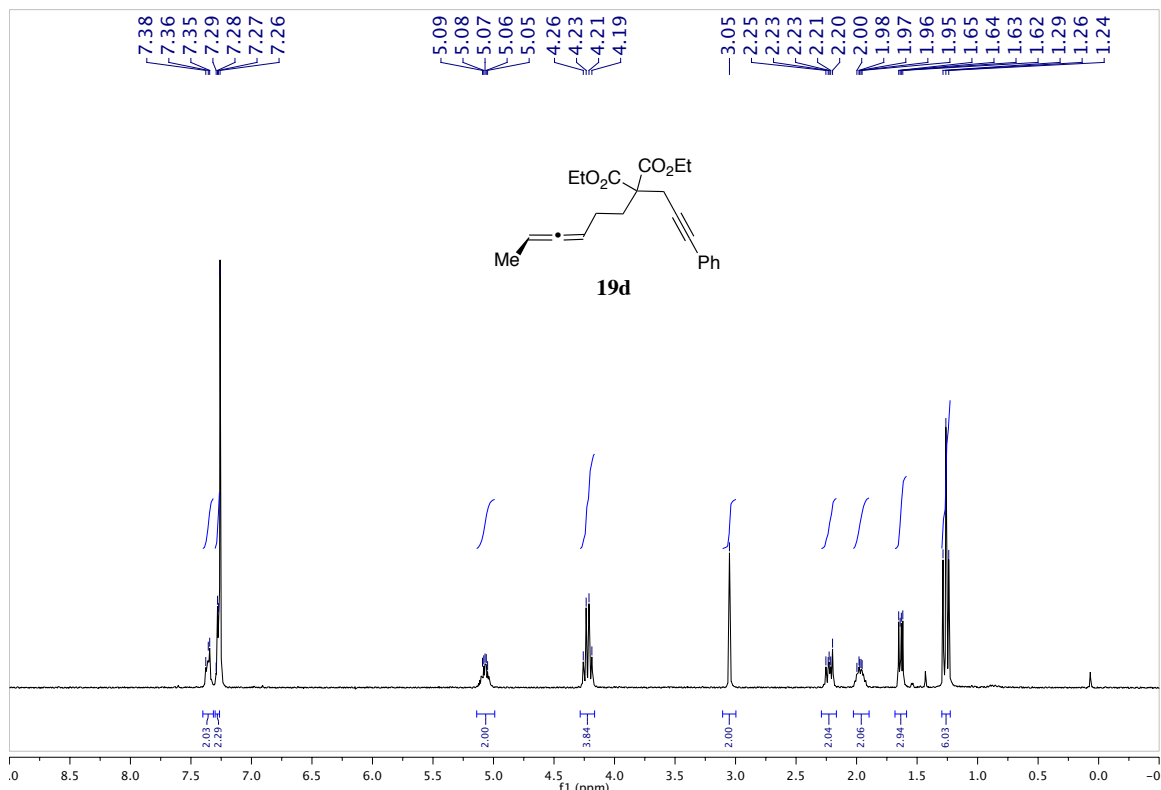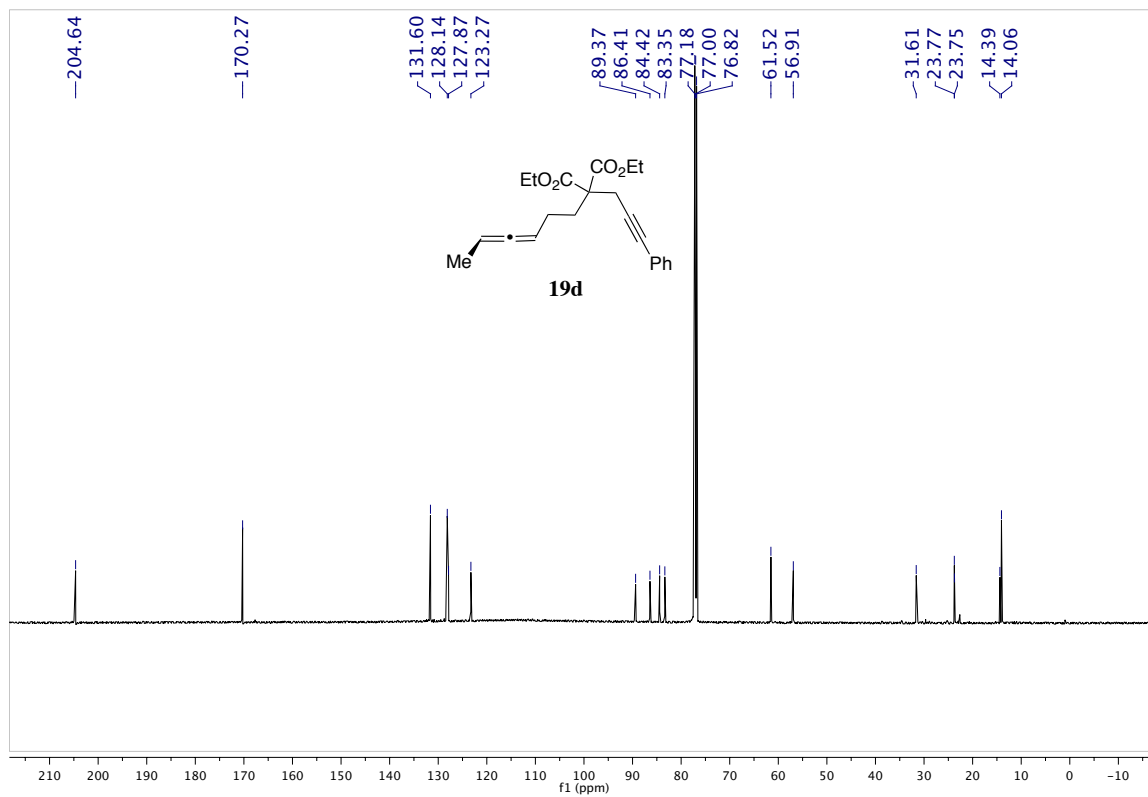

**(S)-Diethyl 1-methyl-2-oxo-3-phenyl-1,2,6,7-tetrahydroazulene-5,5(4H)-dicarboxylate (47d):**

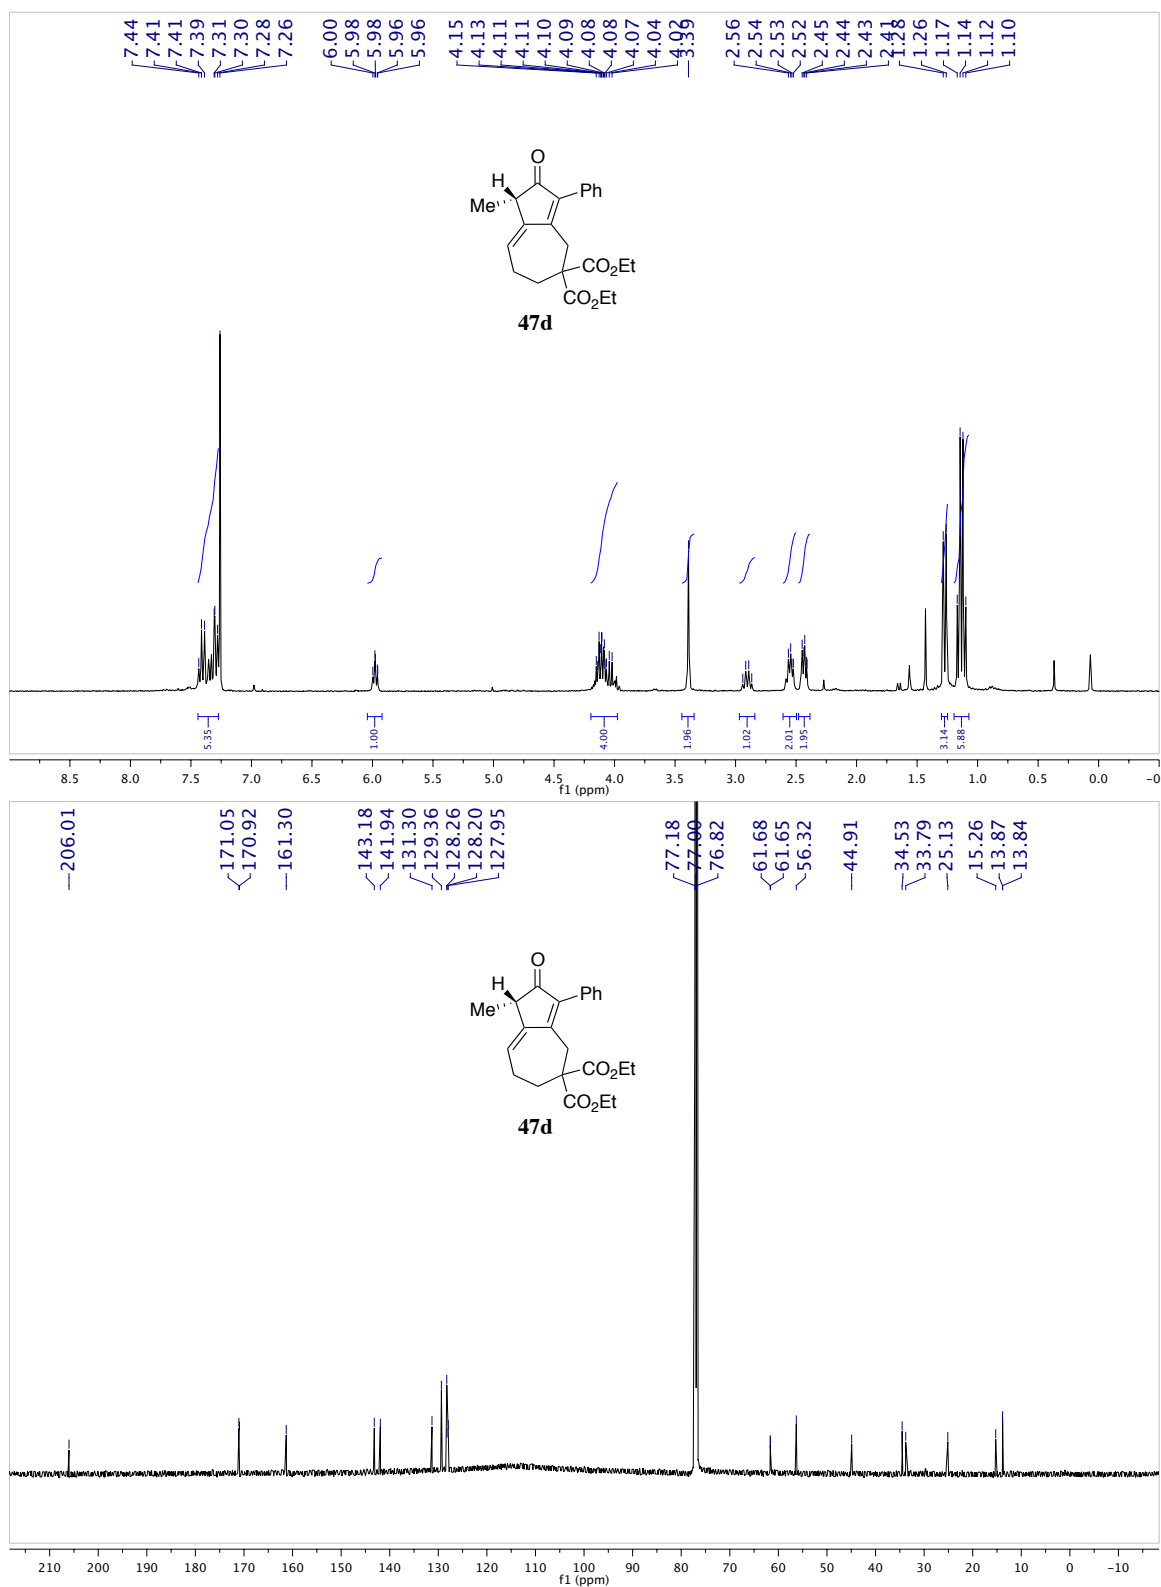

**(*R*<sub>a</sub>)-diethyl 2-(but-2-yn-1-yl)-2-(hexa-3,4-dien-1-yl)malonate (19c):**

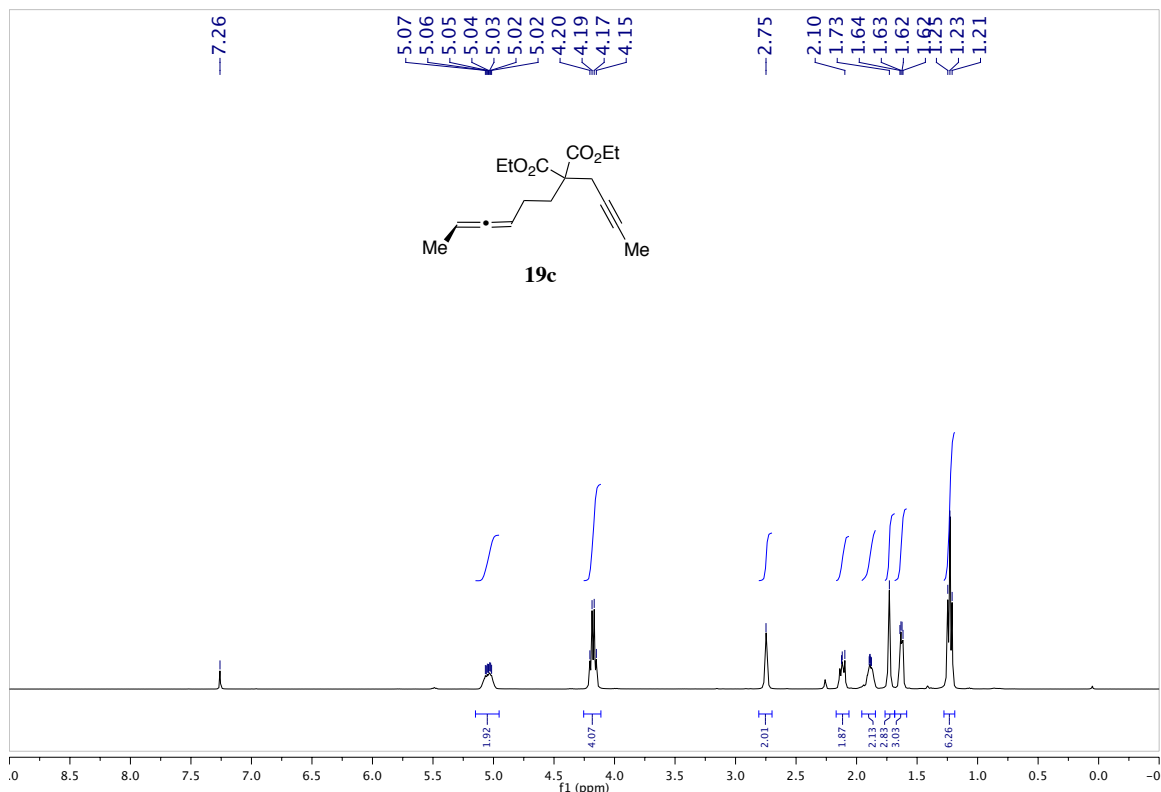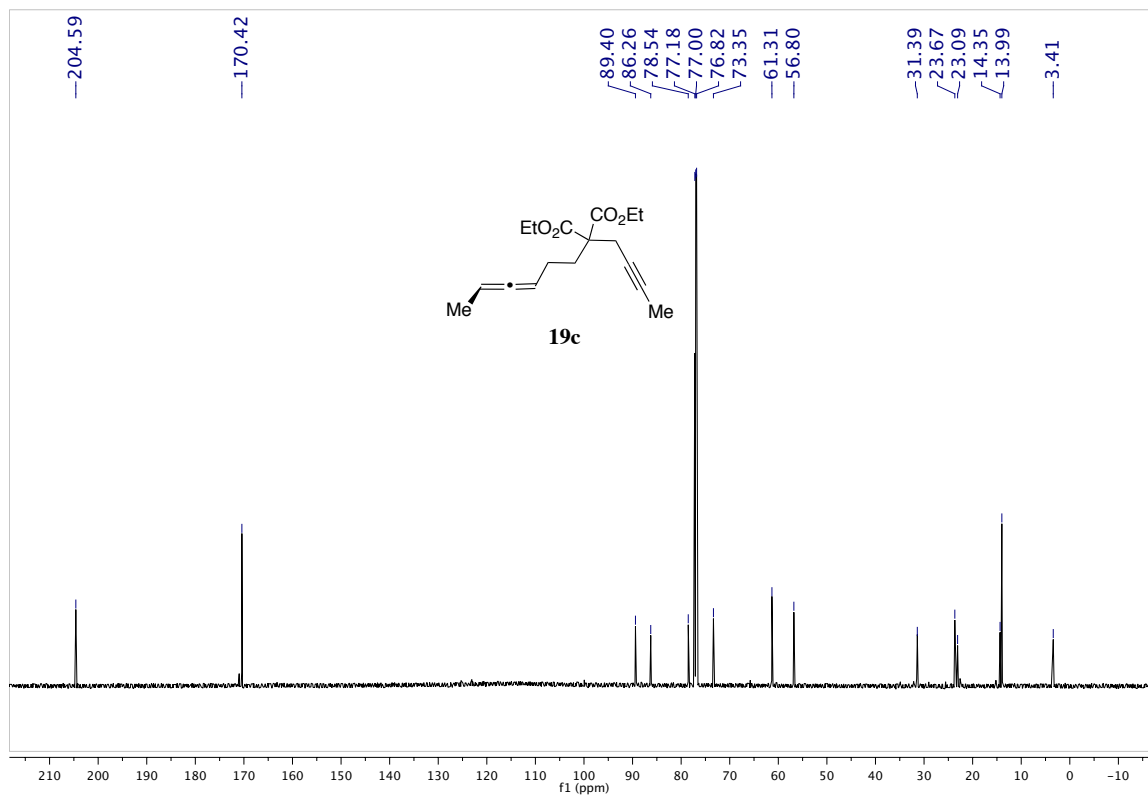

**(S)-diethyl 1,3-dimethyl-2-oxo-1,2,6,7-tetrahydroazulene-5,5(4H)-dicarboxylate (47c):**

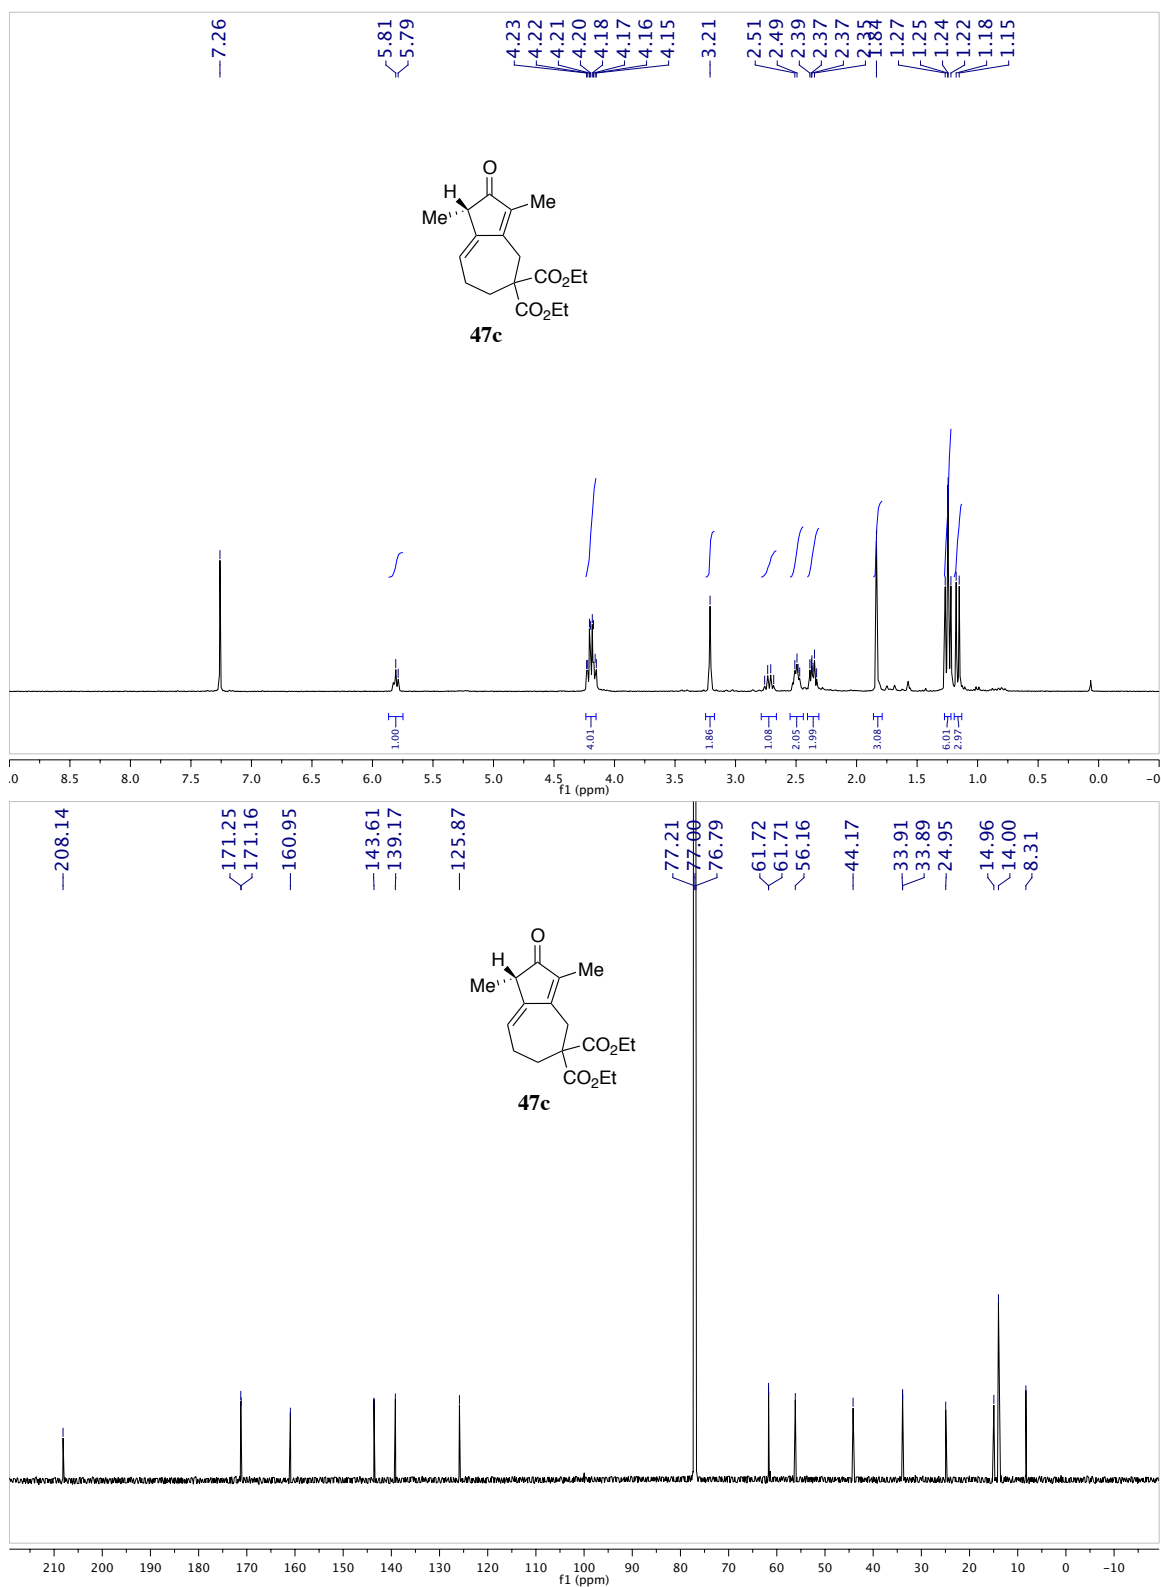

**(*R*<sub>a</sub>)-diethyl 2-(hexa-3,4-dien-1-yl)-2-(prop-2-yn-1-yl)malonate (19e):**

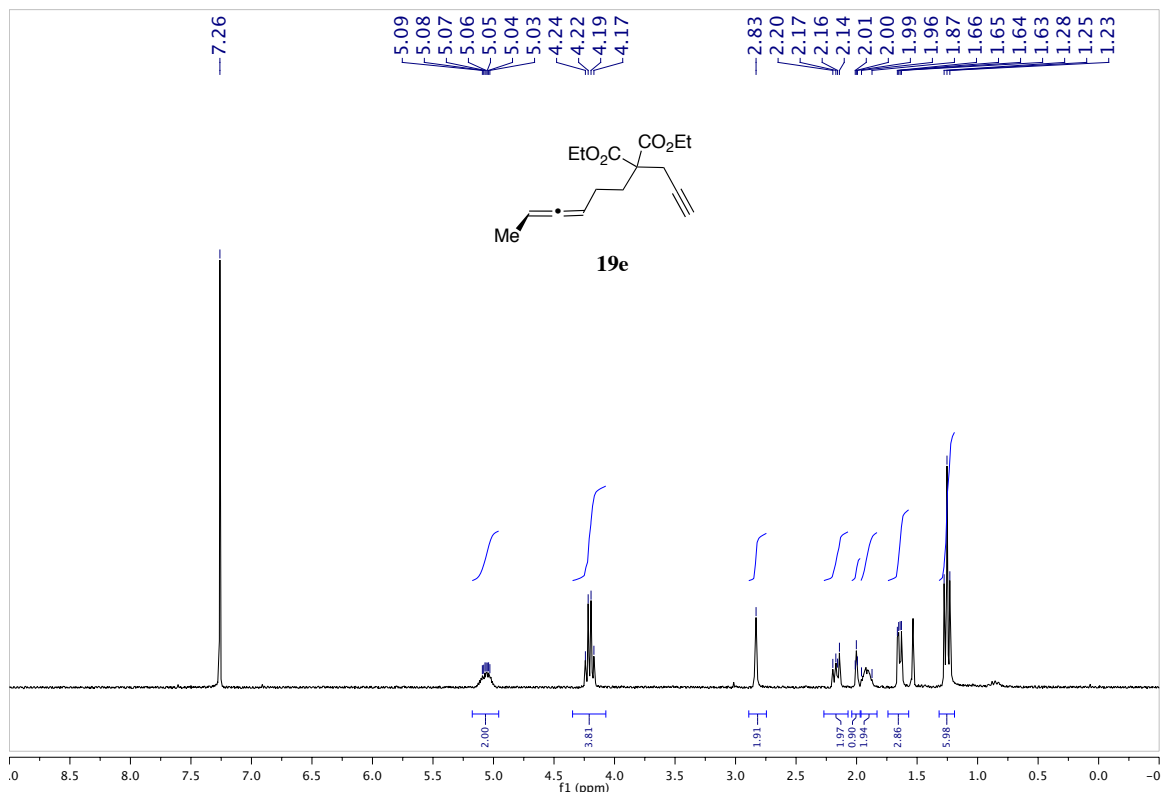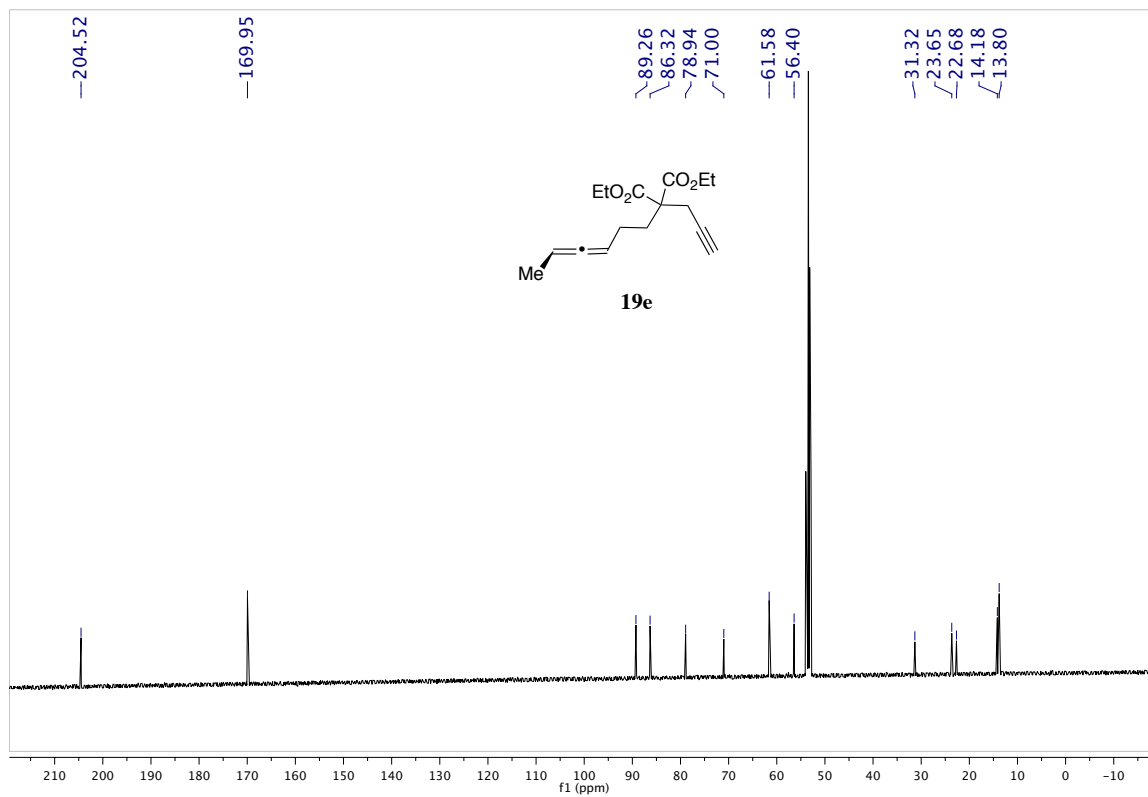

**2-(hexa-3,4-dien-1-yl)-2-(3-(trimethylsilyl)prop-2-yn-1-**

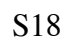

**(S)-diethyl 1-methyl-2-oxo-3-(trimethylsilyl)-1,2,6,7-tetrahydroazulene-5,5(4H)-dicarboxylate (47f):**

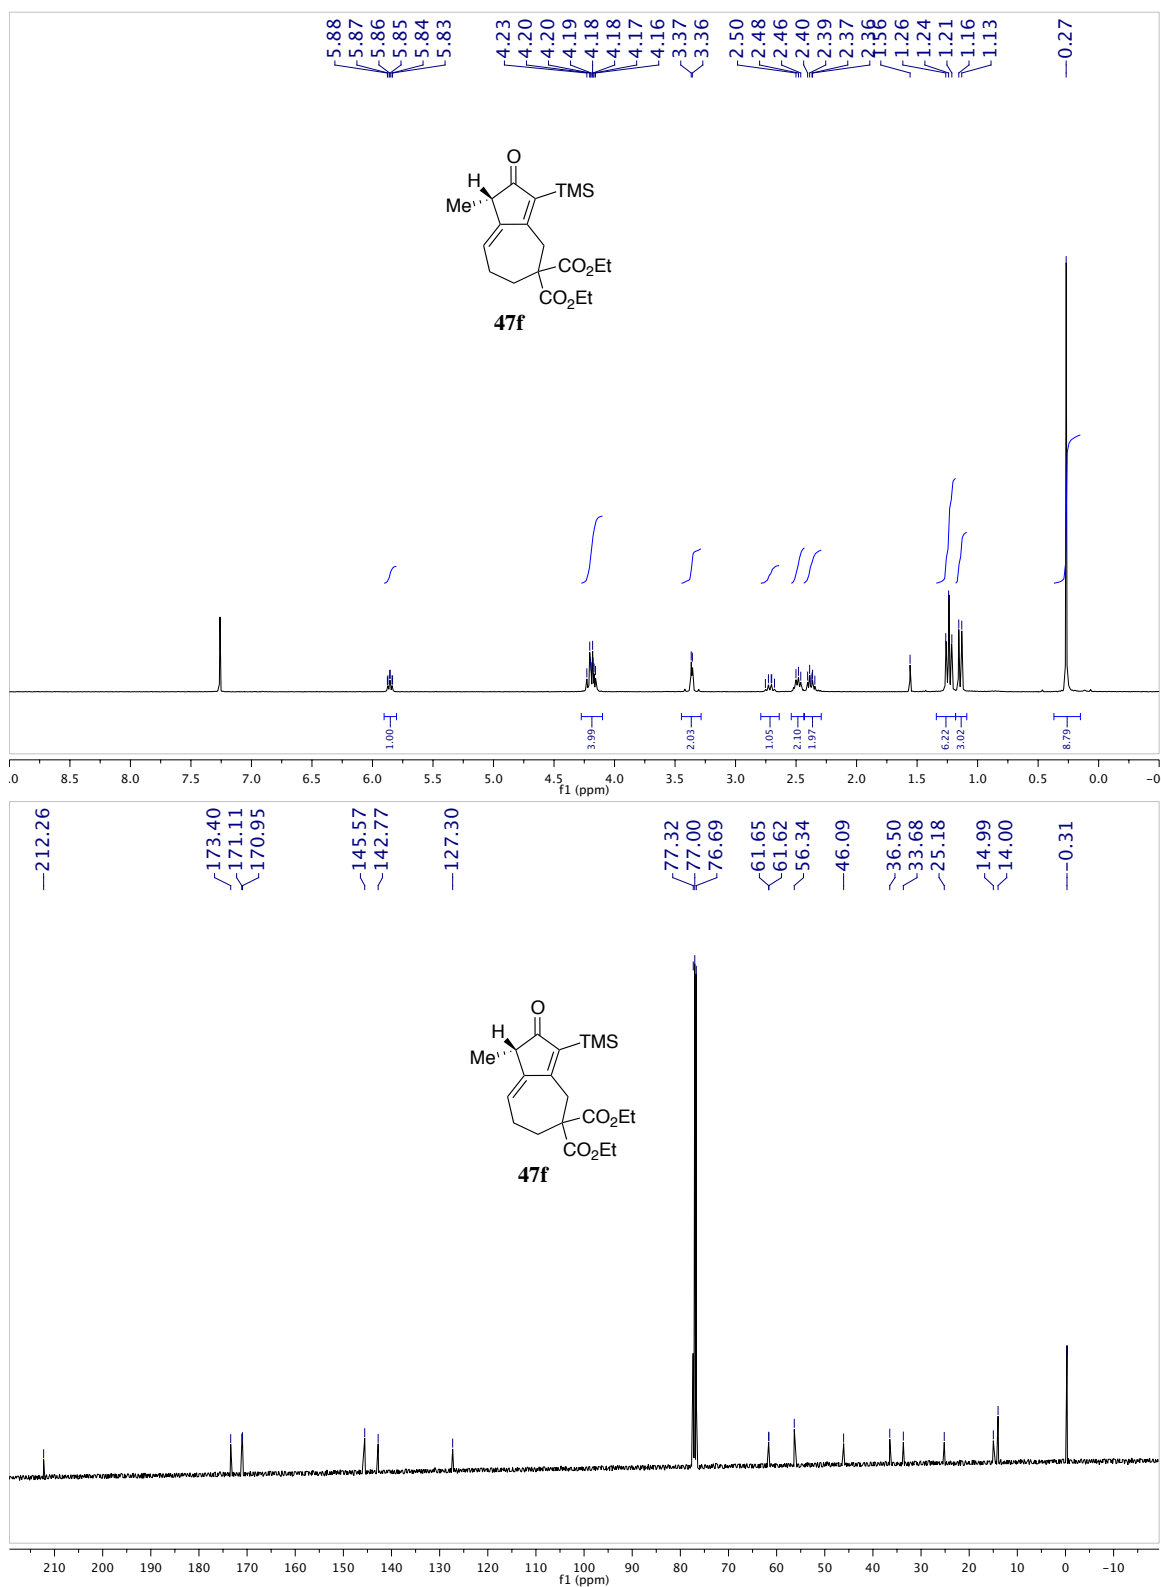

**(*R*<sub>a</sub>)-6-(but-2-yn-1-yloxy)hexa-2,3-diene (18c):**

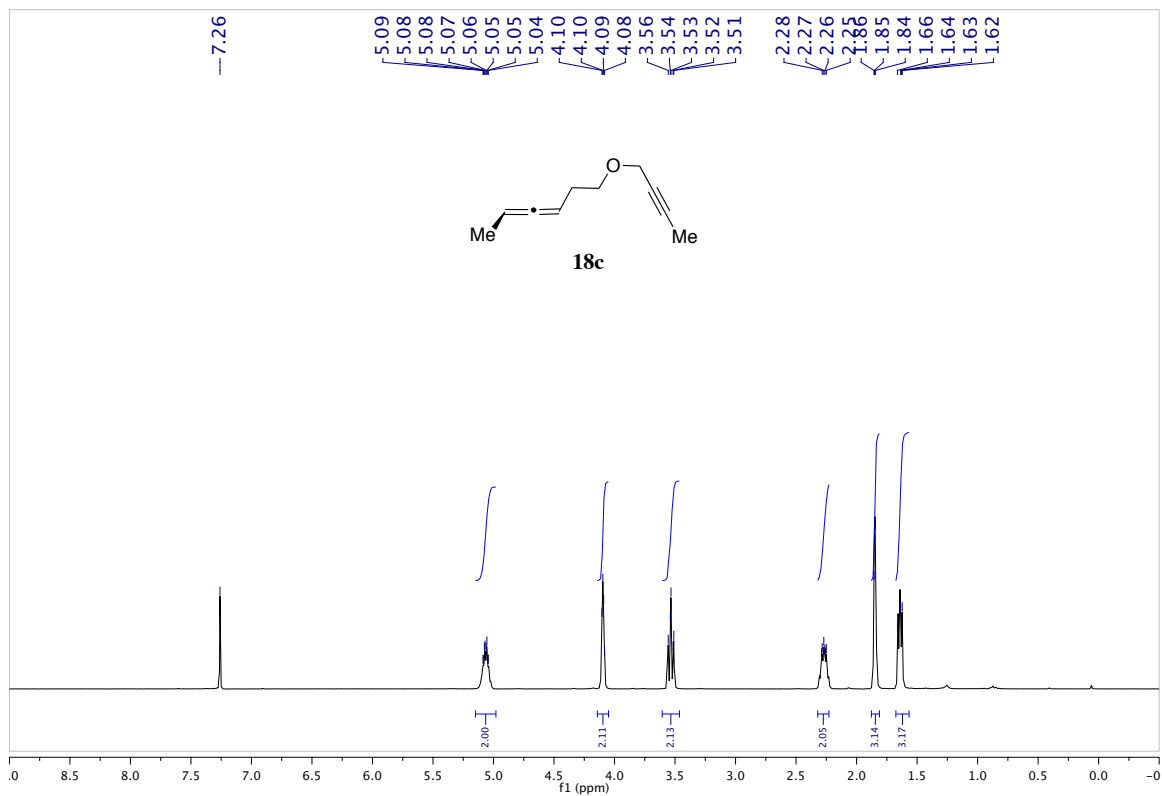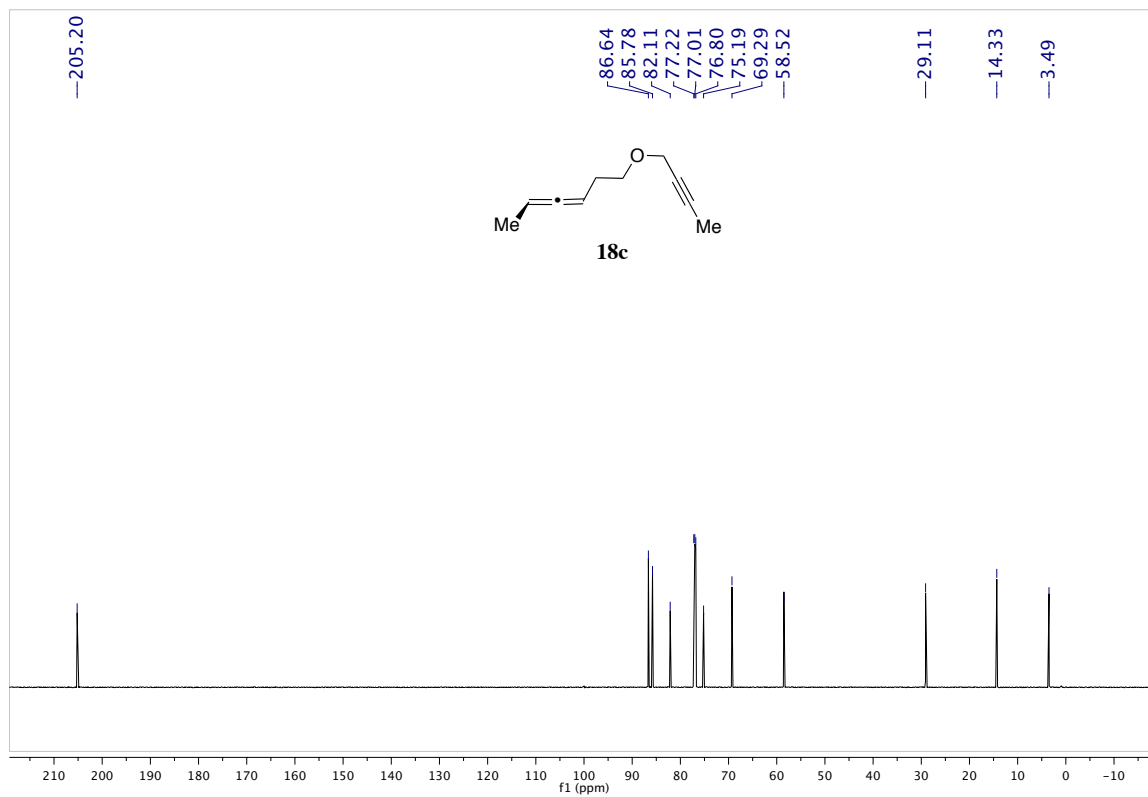



**(S)-6,8-dimethyl-3,4-dihydro-1*H*-cyclopenta[*c*]oxepin-7(6*H*)-one (46c):**

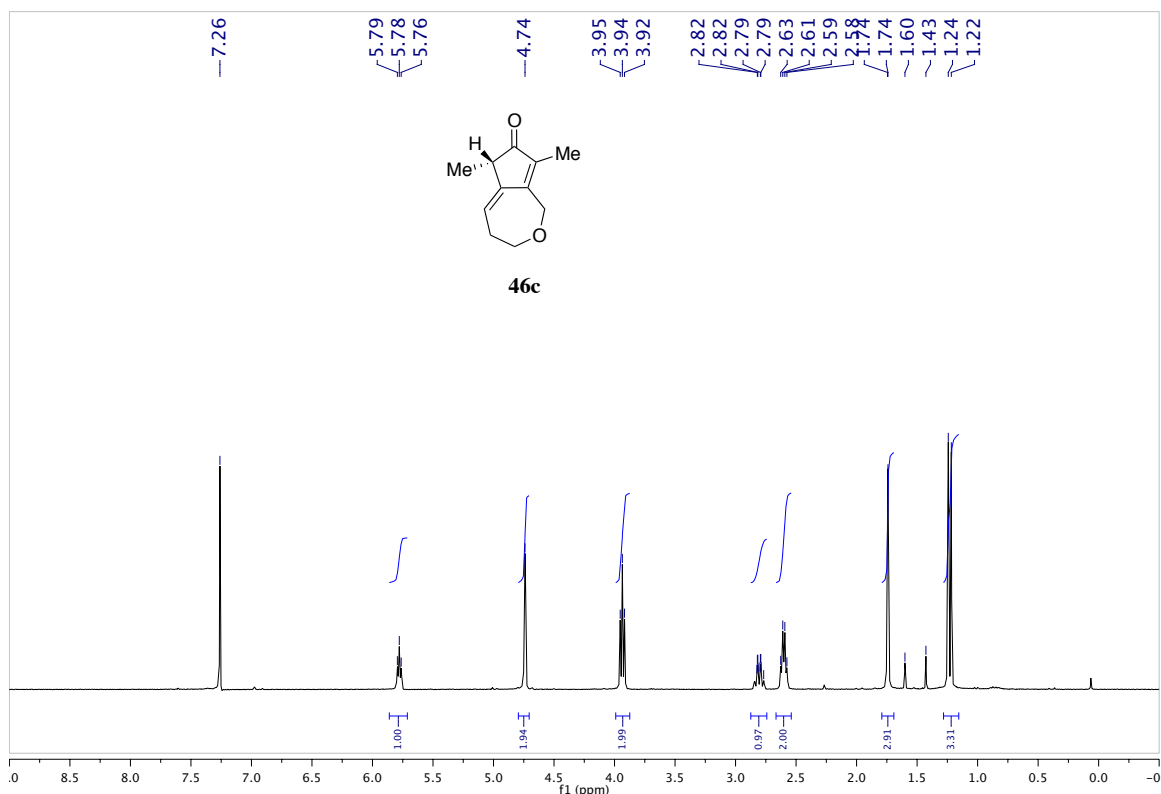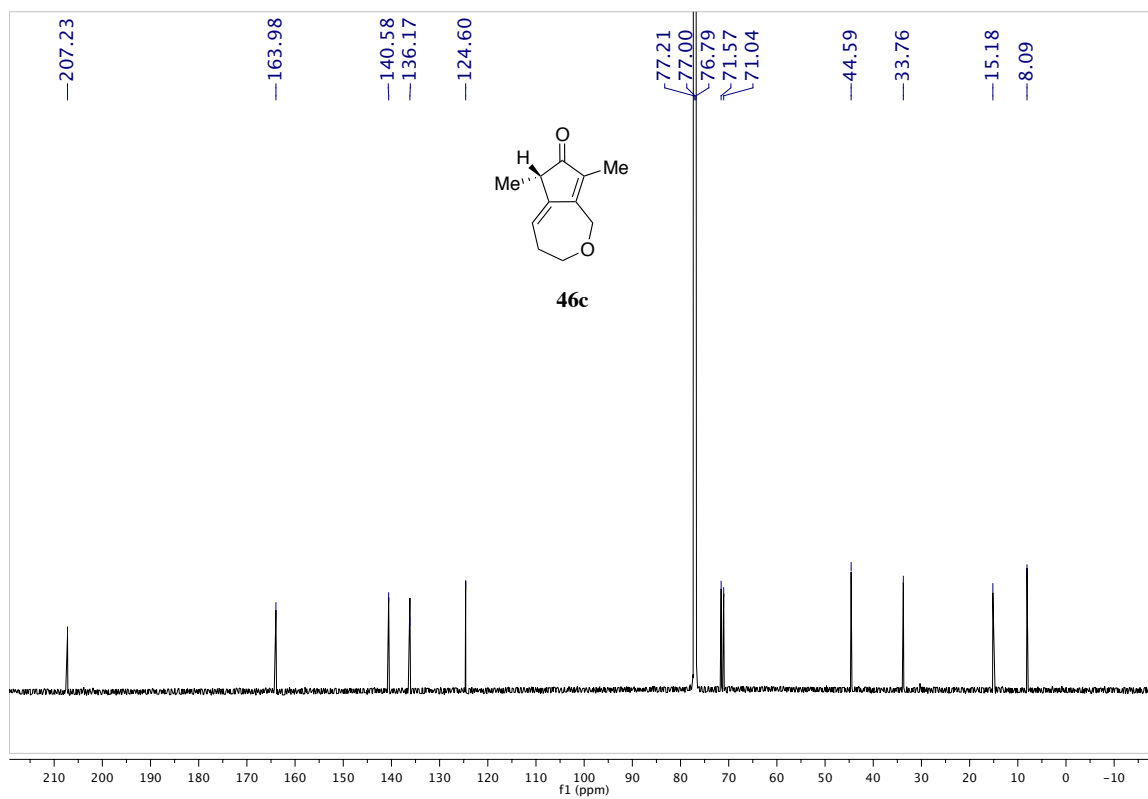

**(*R*<sub>a</sub>)-6-(prop-2-yn-1-yloxy)hexa-2,3-diene (18e):**

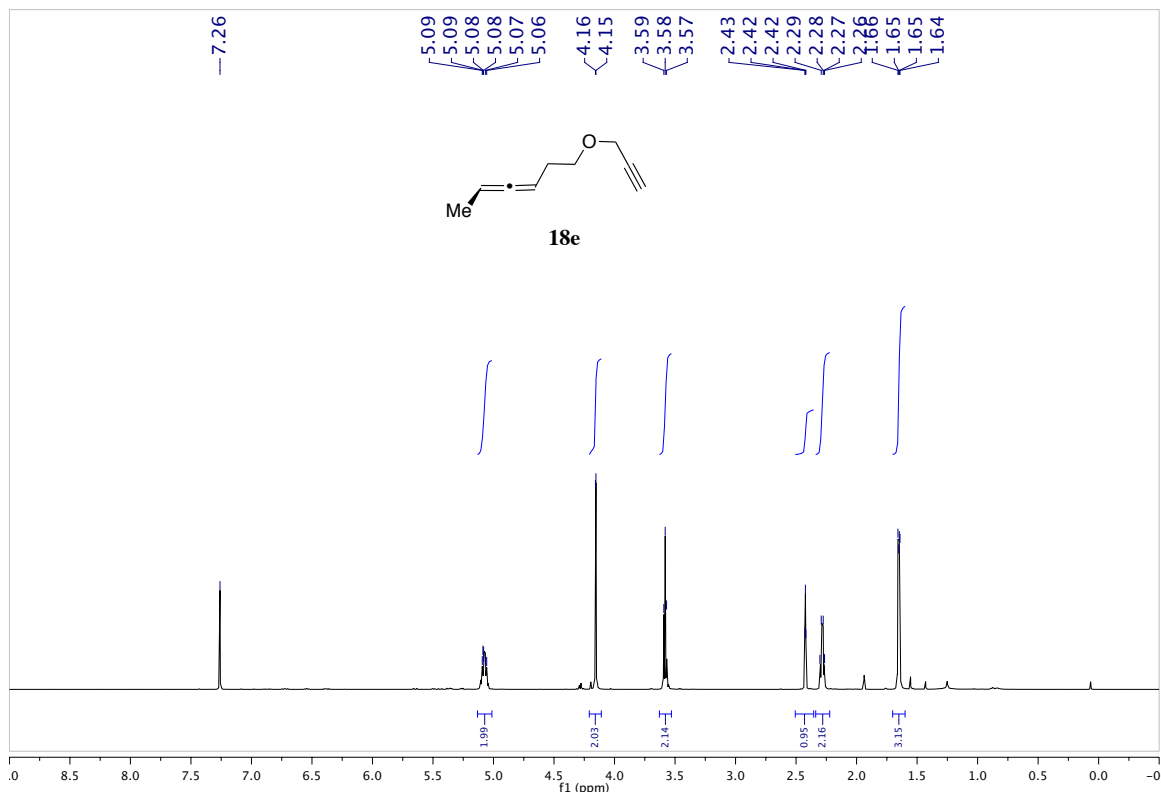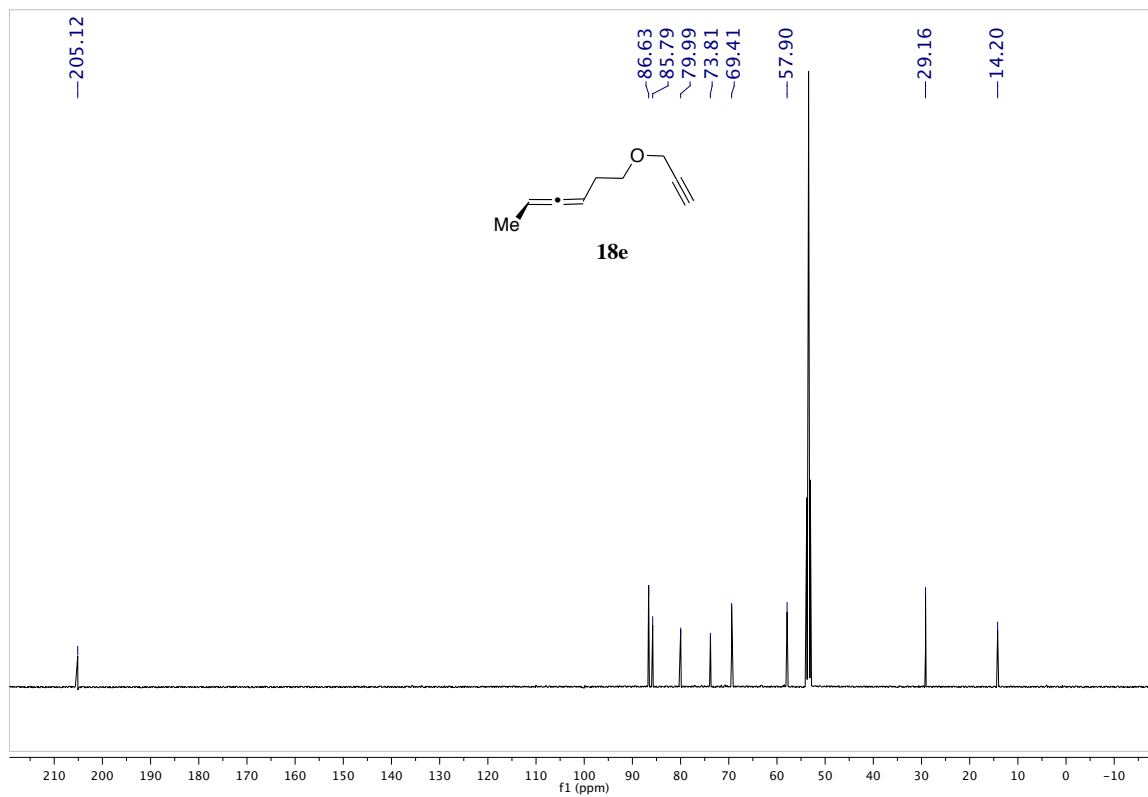

**(S)-6-methyl-3,4-dihydro-1H-cyclopenta[c]oxepin-7(6H)-one (46e):**

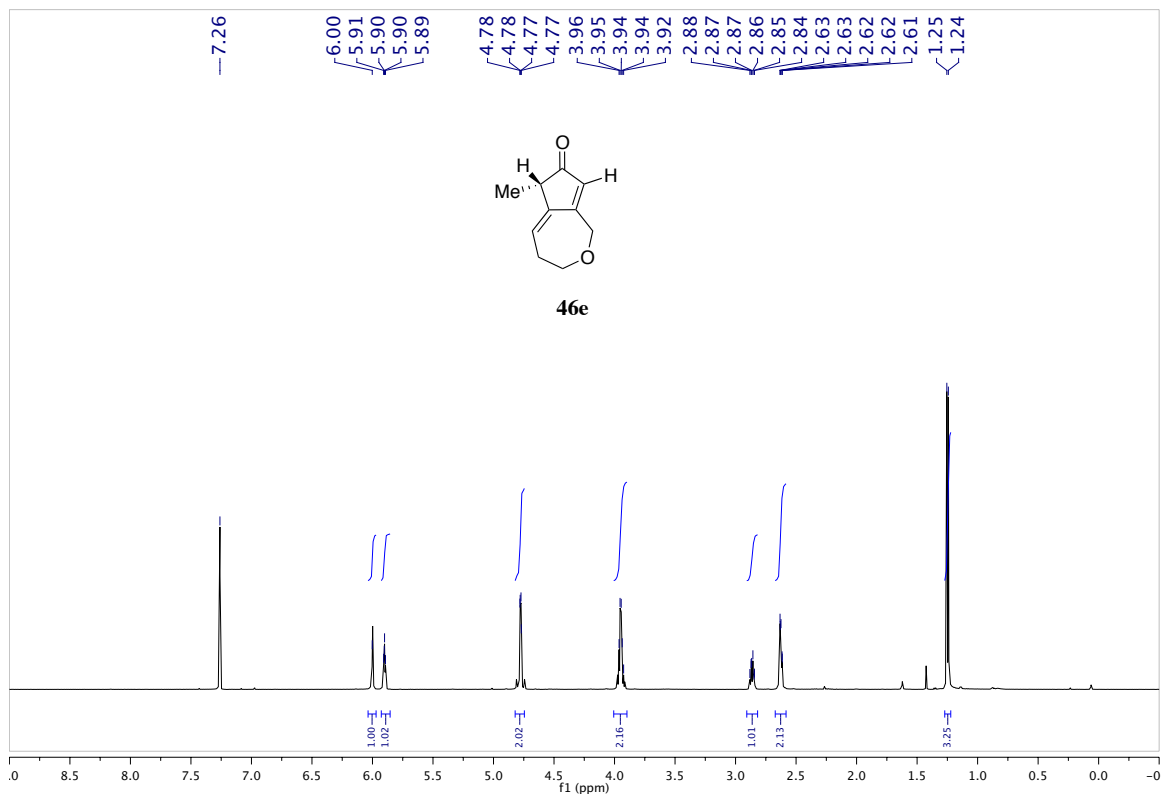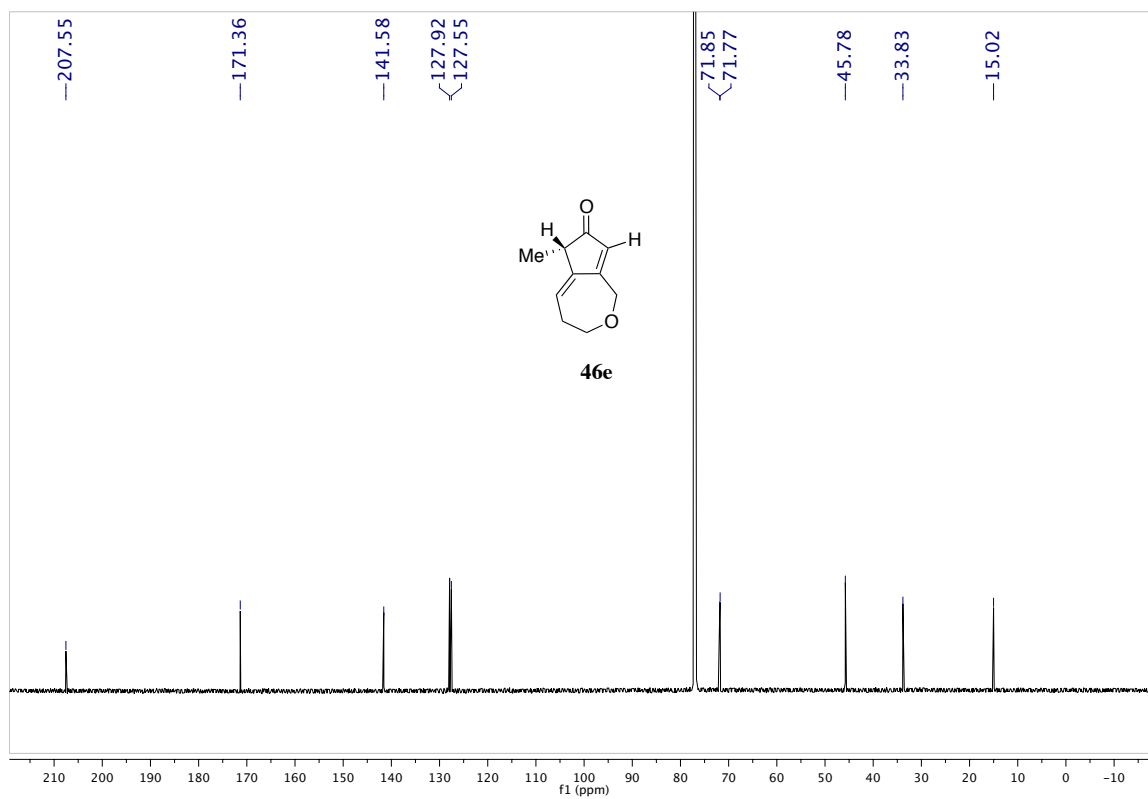

**(*R*<sub>a</sub>)-3-(hexa-3,4-dien-1-yloxy)prop-1-yn-1-yl)trimethylsilane (18f):**

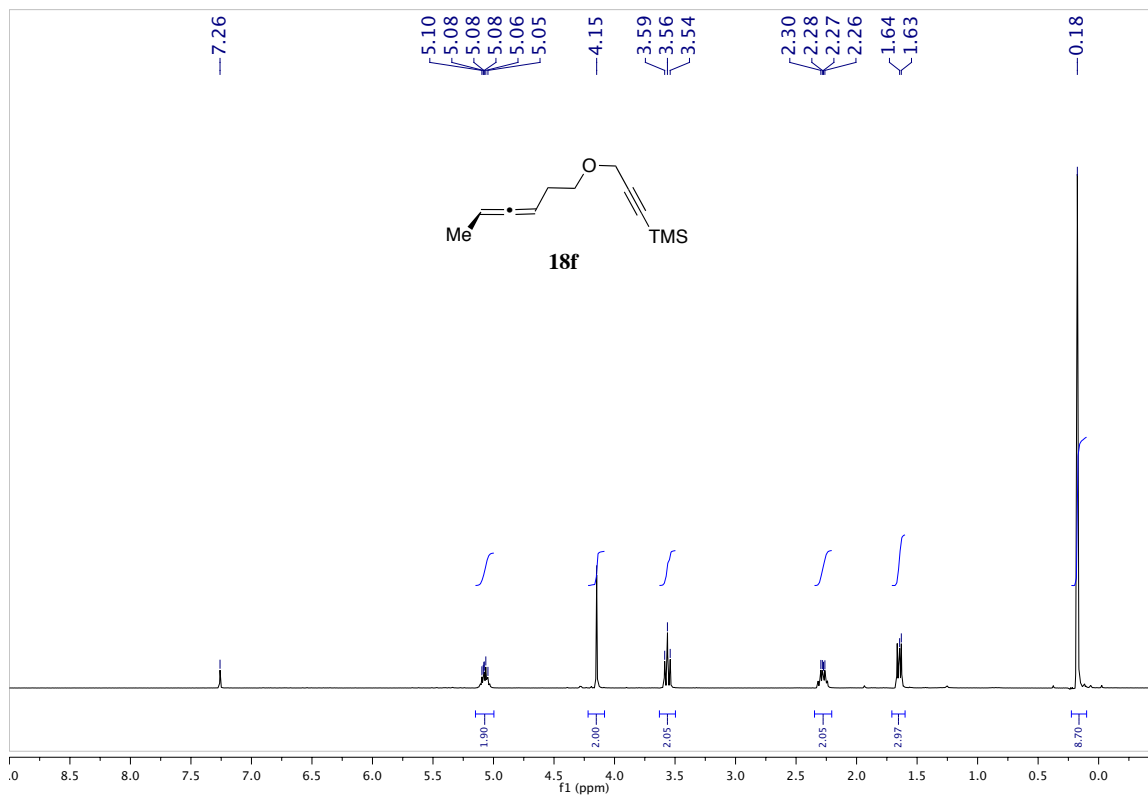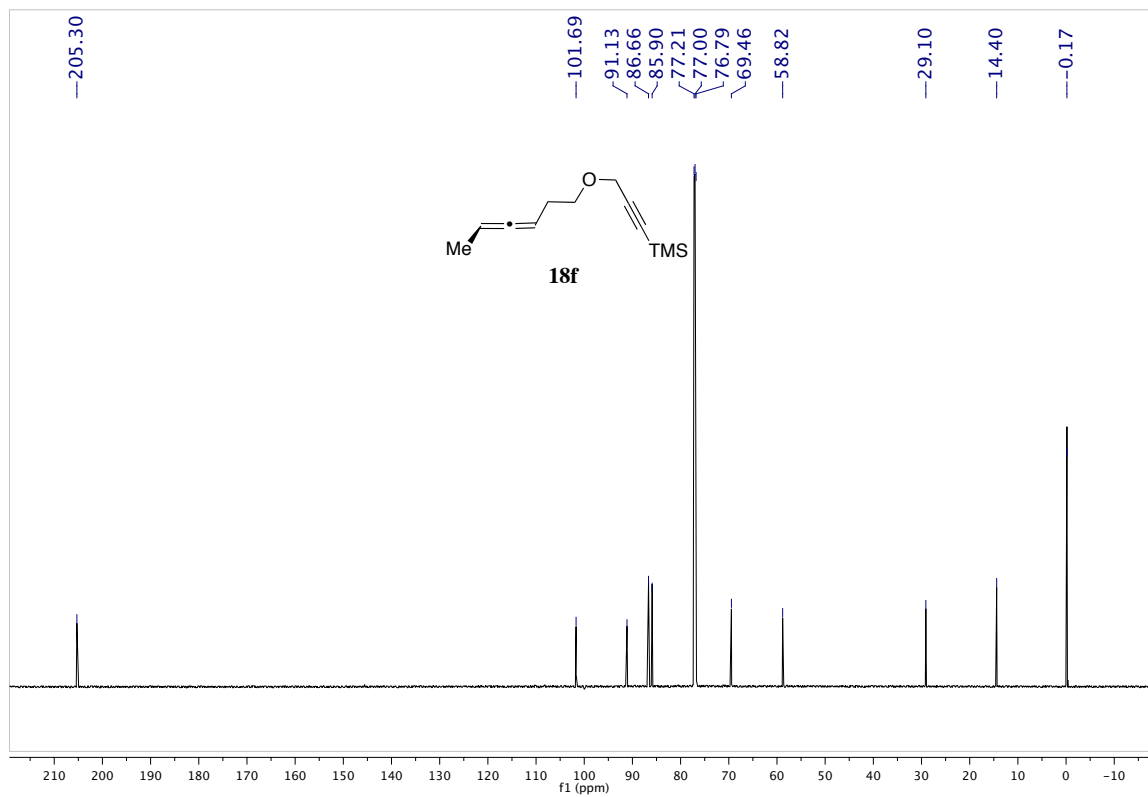

**(S)-6-methyl-8-(trimethylsilyl)-3,4-dihydro-1*H*-cyclopenta[*c*]oxepin-7(6*H*)-one (46f):**

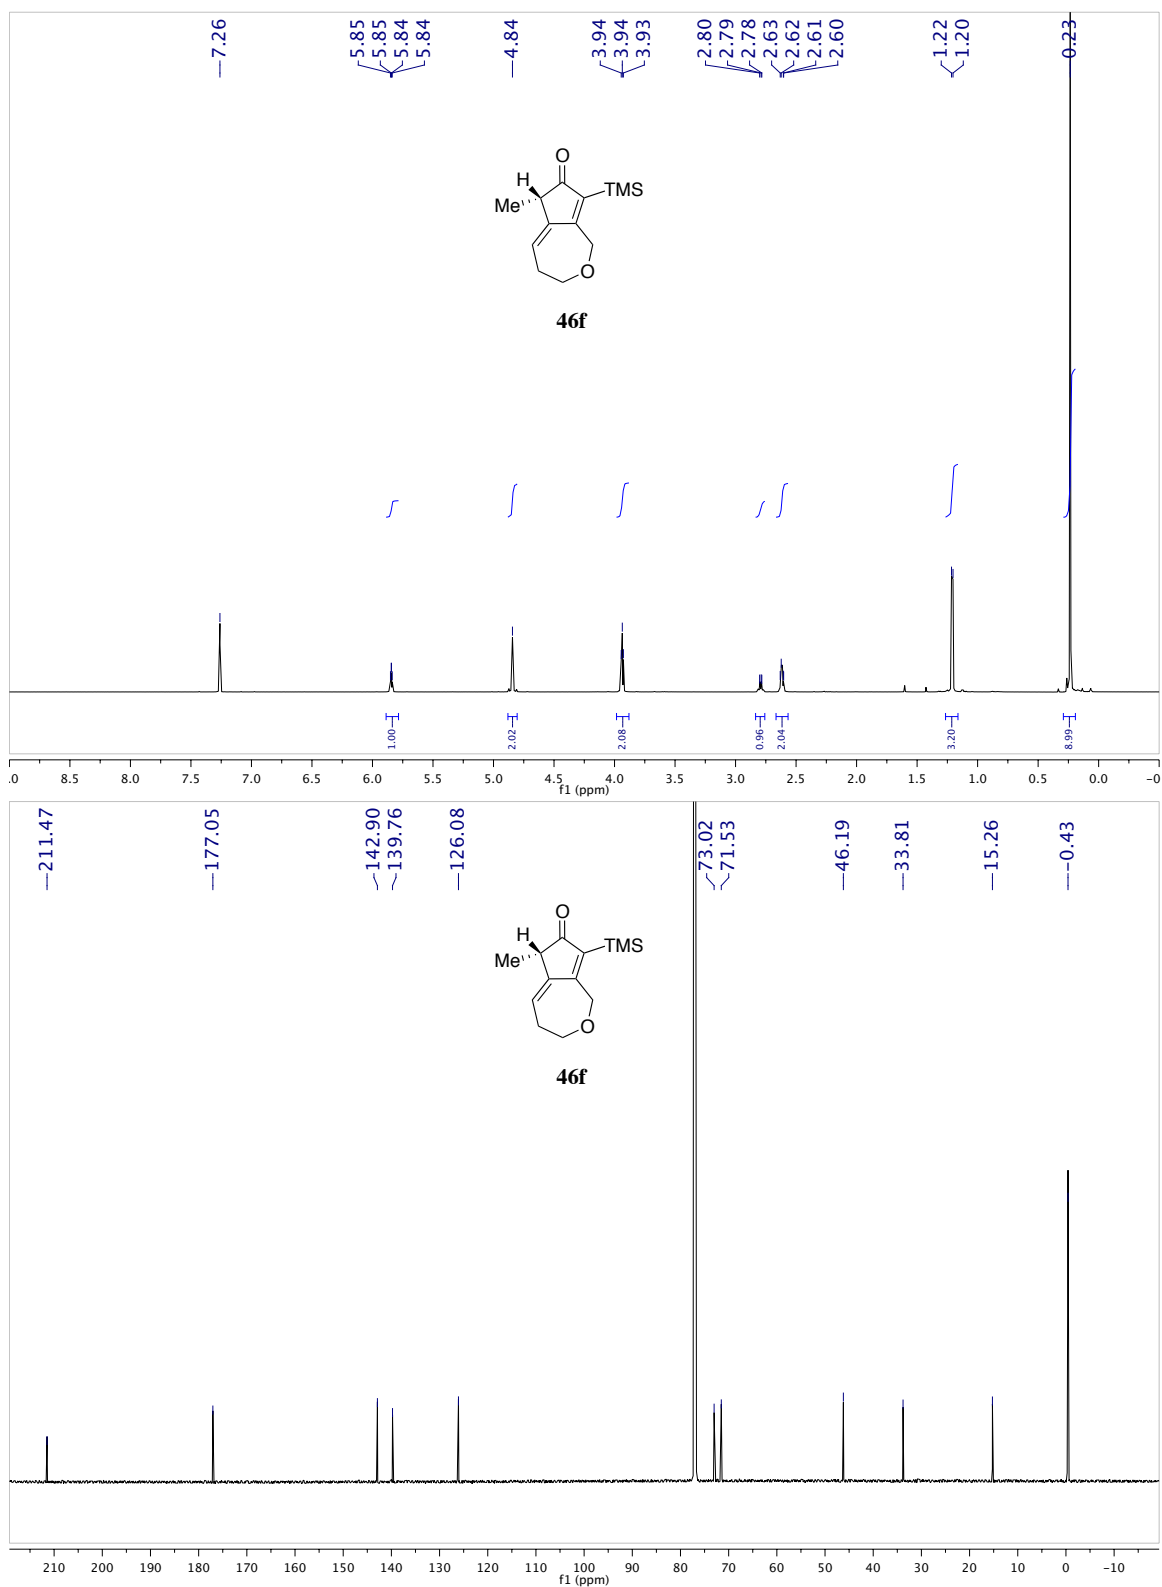

Chemical structure of **18d** is shown above the spectrum. The structure is a conjugated enyne system: CC=C/C=C/OCC#CC1=CC=CC=C1. The spectrum displays the following chemical shifts (ppm) and integrations:

| Chemical Shift (ppm)                     | Integration |
|------------------------------------------|-------------|
| 7.46, 7.45, 7.44, 7.32, 7.31, 7.30, 7.26 | 1.92, 2.85  |
| 5.12, 5.10, 5.09, 5.08                   | 2.00        |
| 4.38                                     | 2.11        |
| 3.67, 3.65, 3.64                         | 2.09        |
| 2.34, 2.33, 2.32, 2.31                   | 2.08        |
| 1.67, 1.66, 1.64                         | 3.07        |

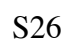

**(S)-6-methyl-8-phenyl-3,4-dihydro-1H-cyclopenta[c]oxepin-7(6H)-one (46d):**

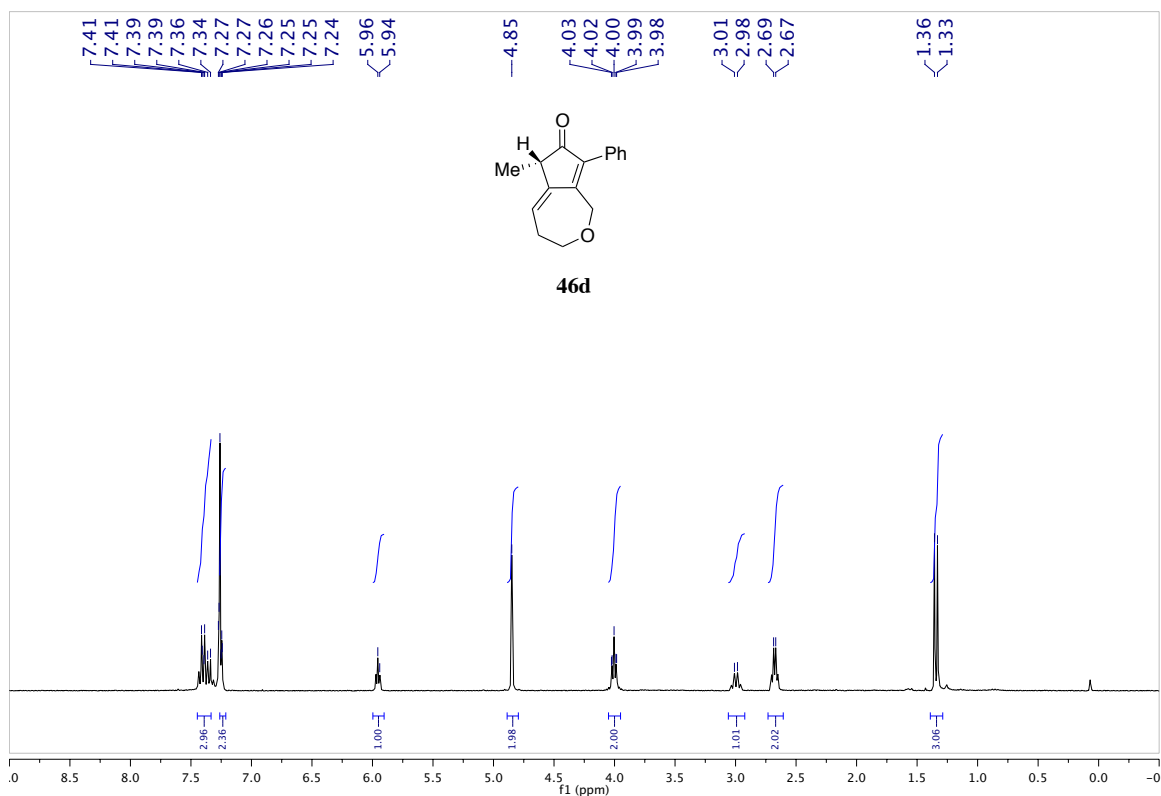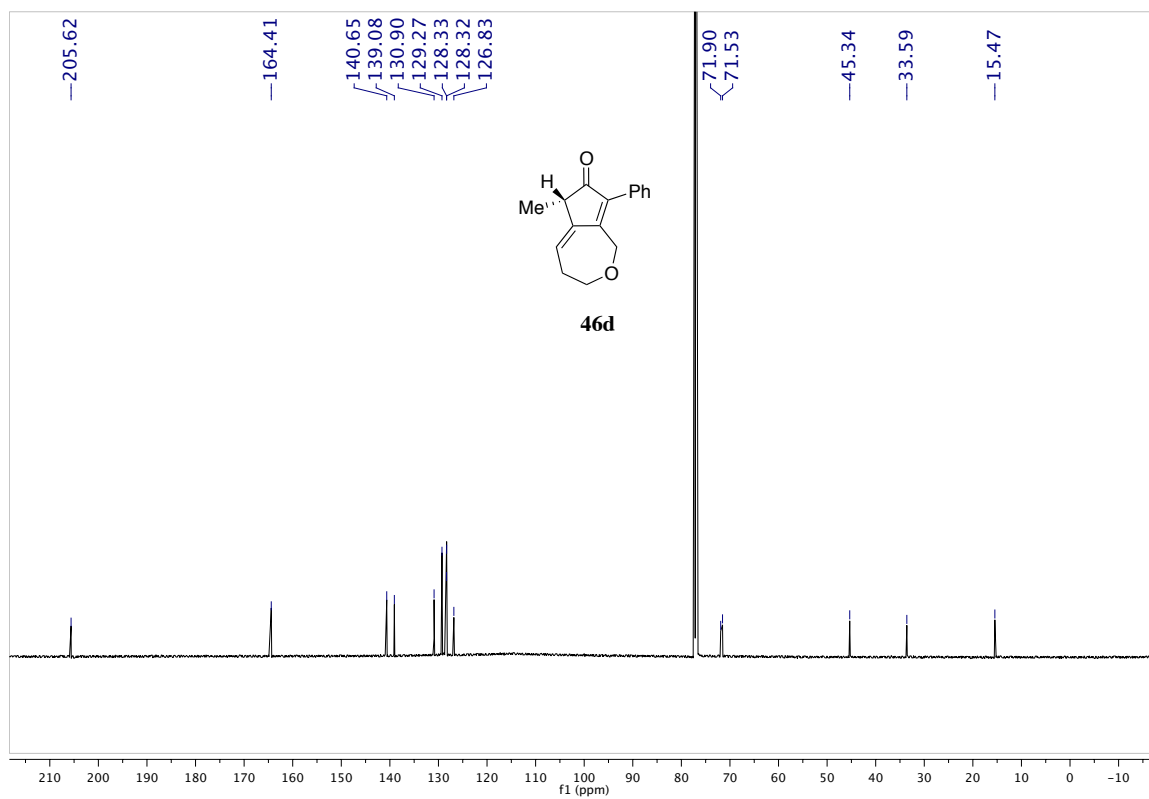

**(R<sub>a</sub>)-N-(but-2-yn-1-yl)-N-(3-(dimethyl(phenyl)silyl)hexa-3,4-dien-1-yl)-4-methylbenzenesulfonamide (13c):**

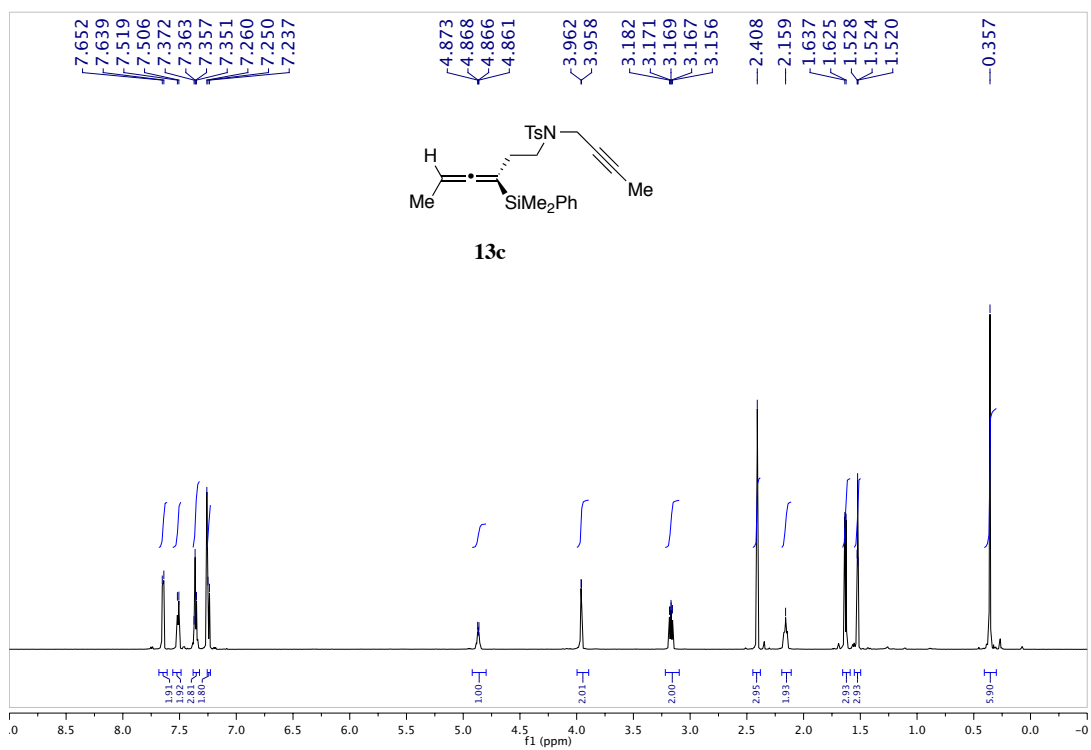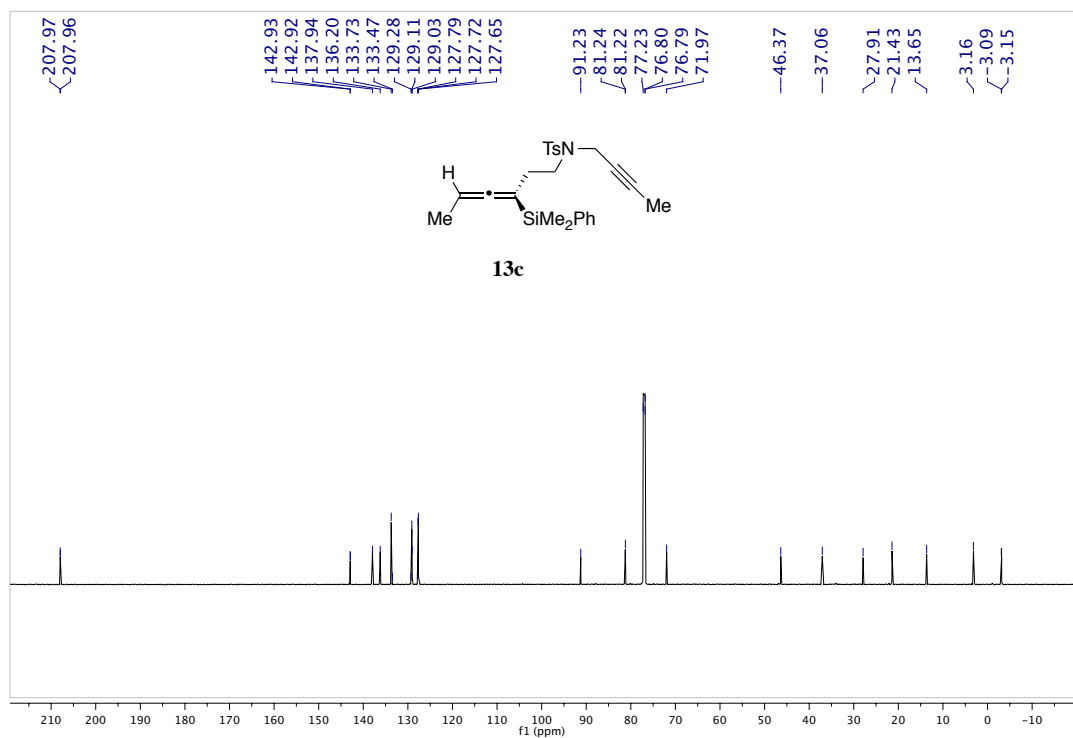



**(S)-5-(dimethyl(phenyl)silyl)-6,8-dimethyl-2-tosyl-1,2,3,4-tetrahydrocyclopenta[c]azepin-7(6H)-one (35c):**

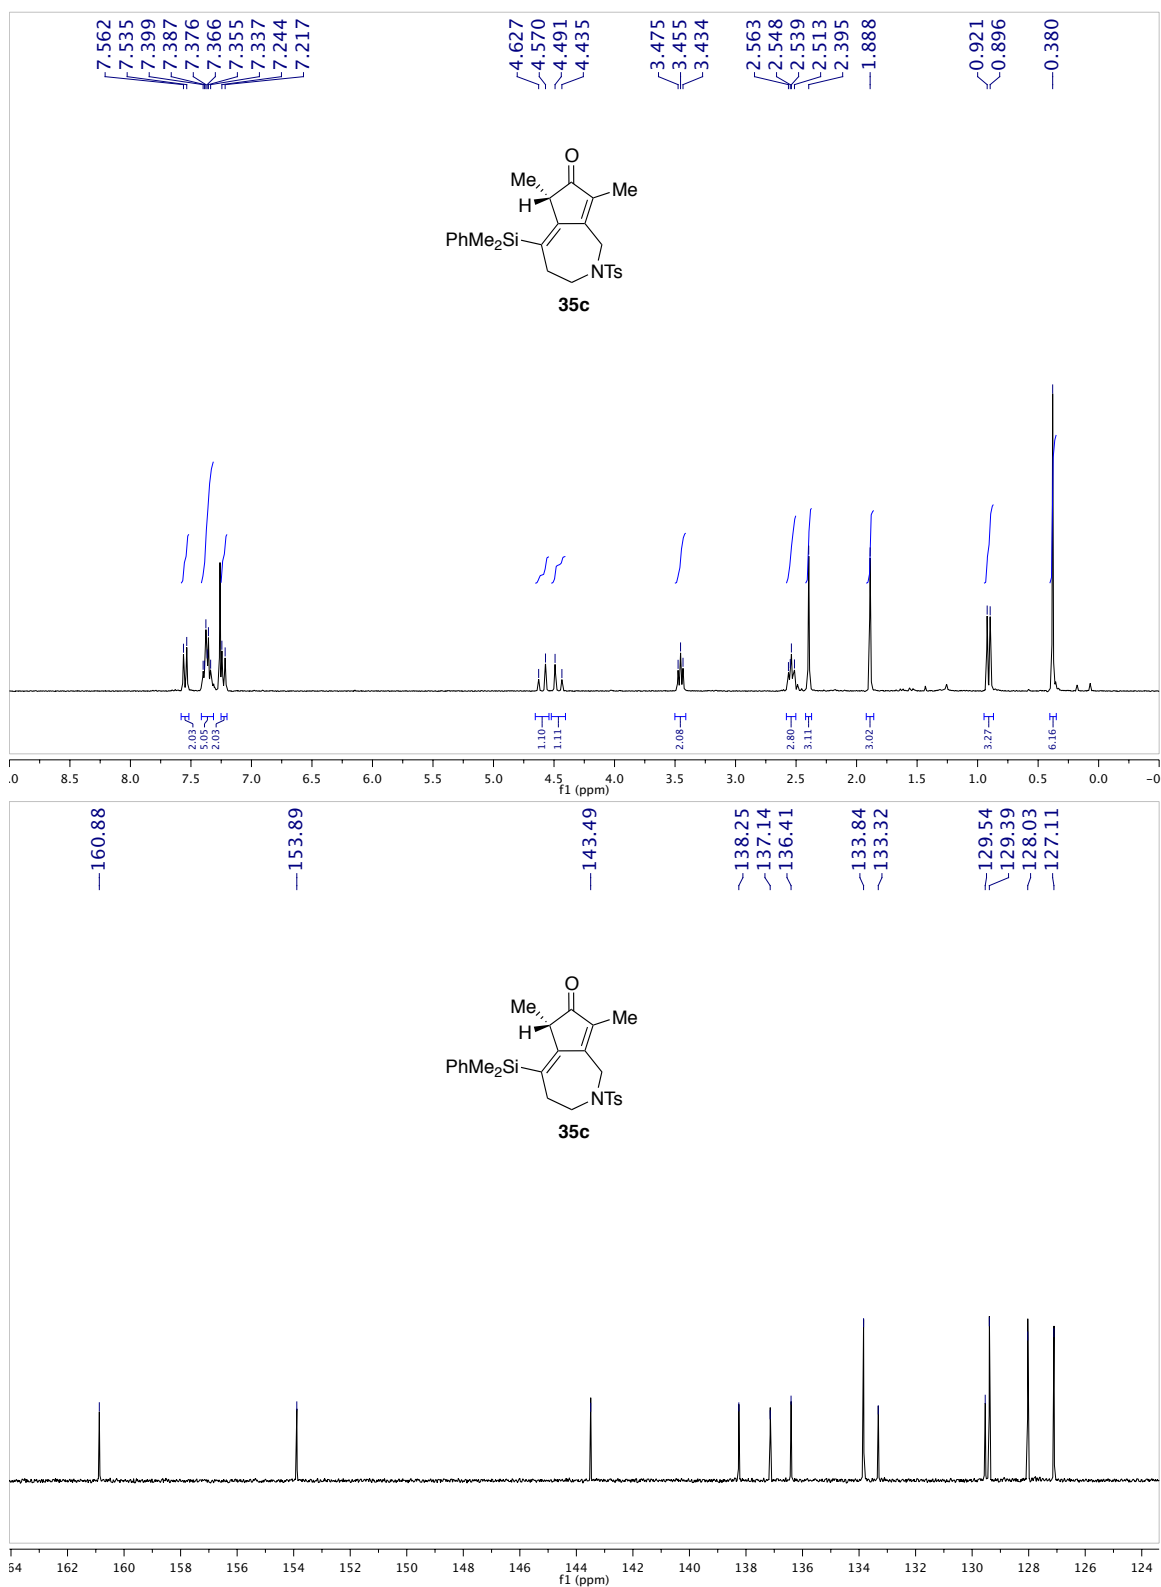

**(Z)-5-(dimethyl(phenyl)silyl)-3-ethylidene-1-tosyl-4-vinyl-2,3,6,7-tetrahydro-1H-azepine (36):**

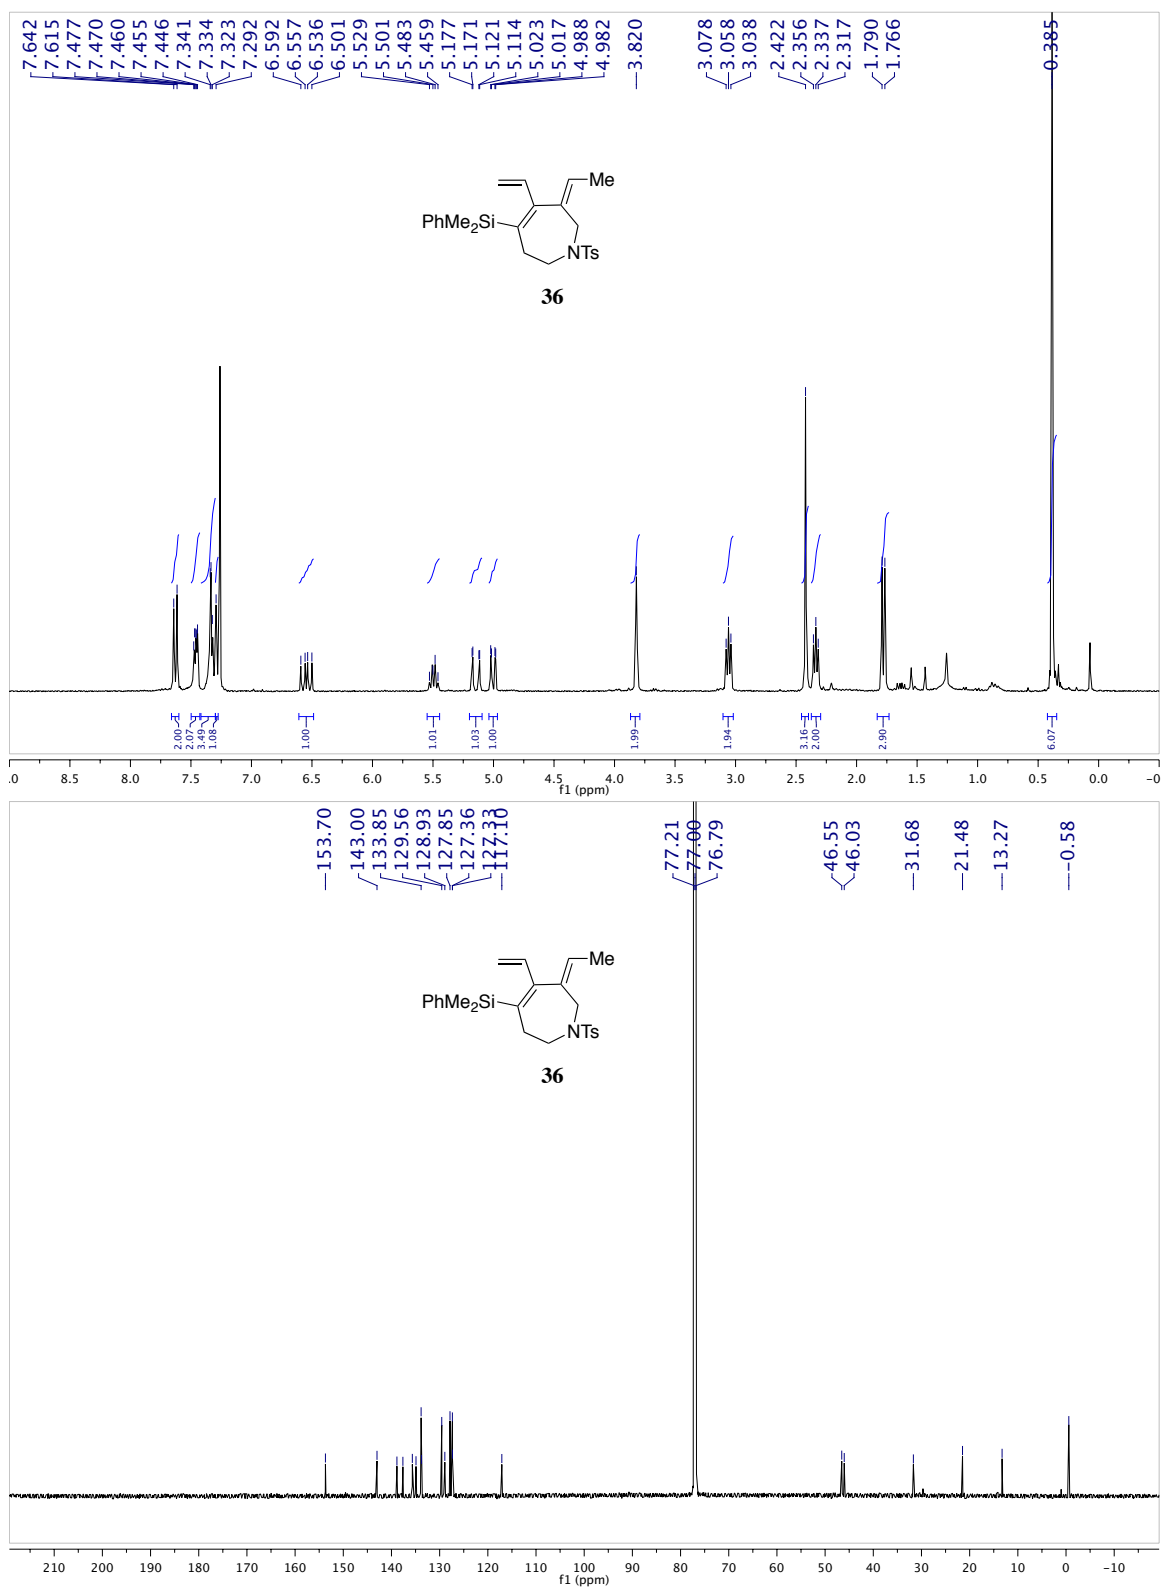

**(*R*<sub>a</sub>)-*N*-(3-(dimethyl(phenyl)silyl)hexa-3,4-dien-1-yl)-4-methyl-*N*-(prop-2-yn-1-yl)benzene sulfonamide (13e):**

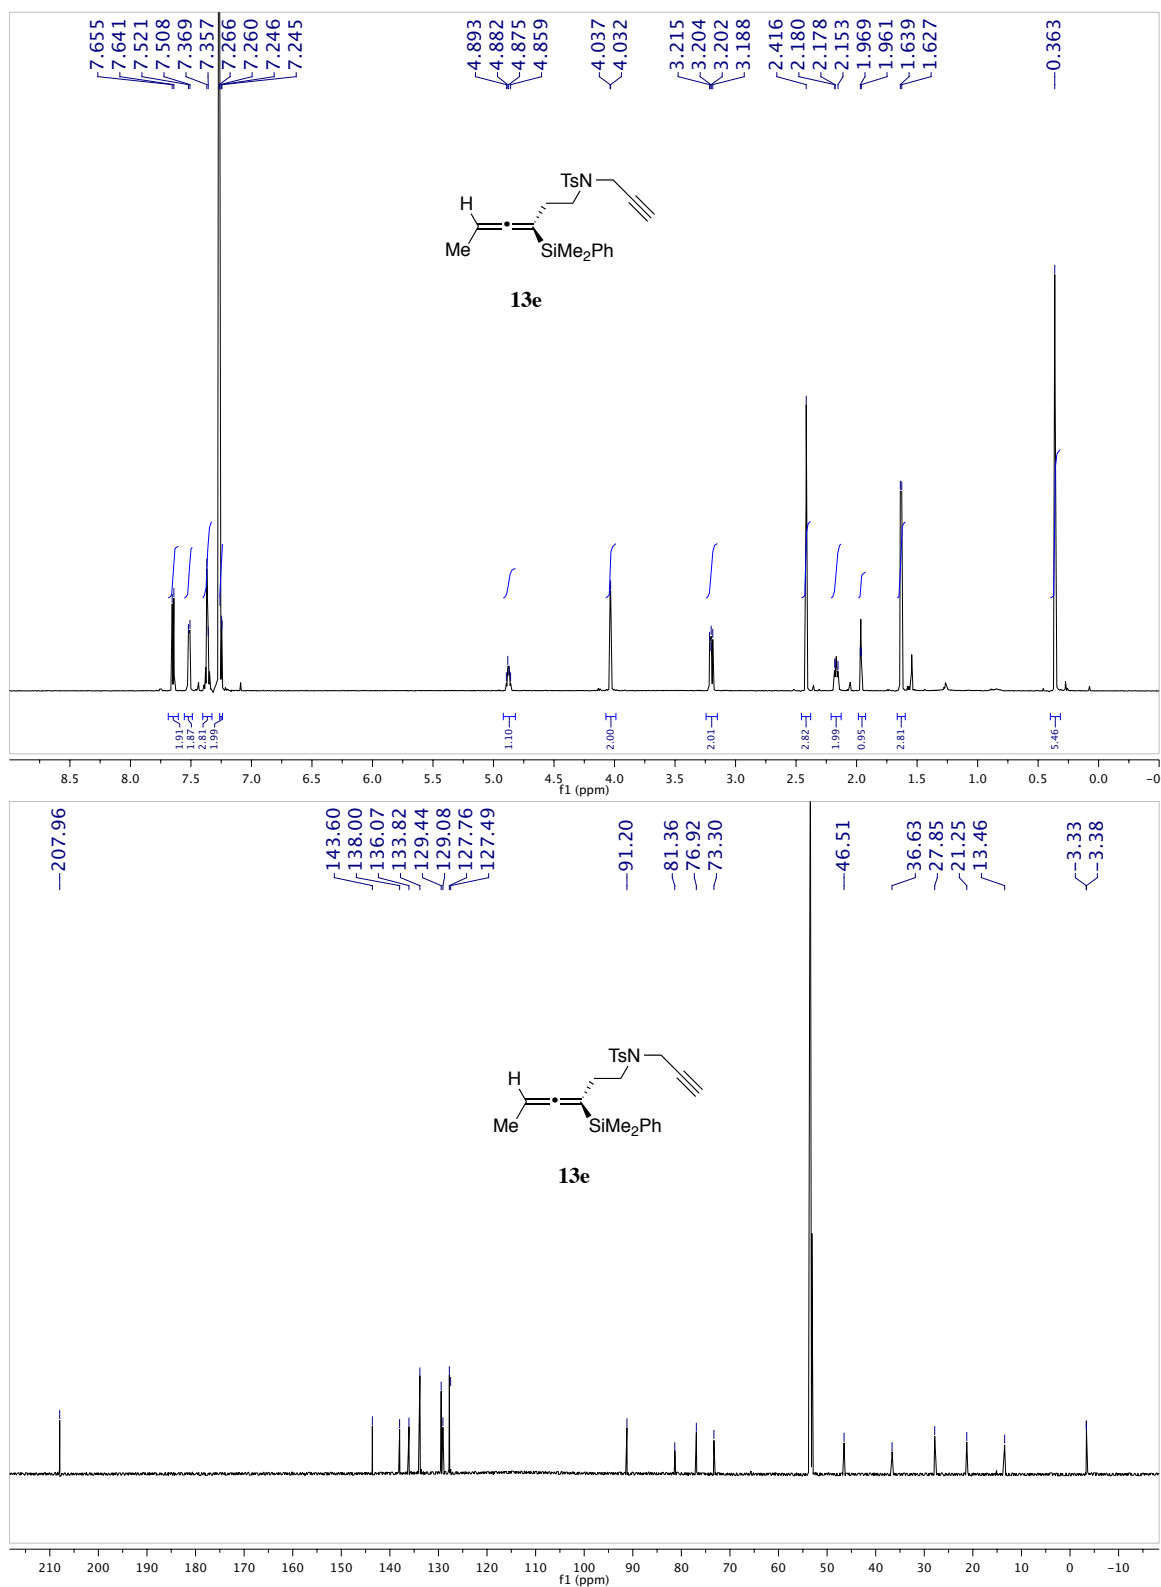

**(S)-5-(dimethyl(phenyl)silyl)-6-methyl-2-tosyl-1,2,3,4-tetrahydrocyclopenta**

**[c]azepin-7(6H)-one (35e):**

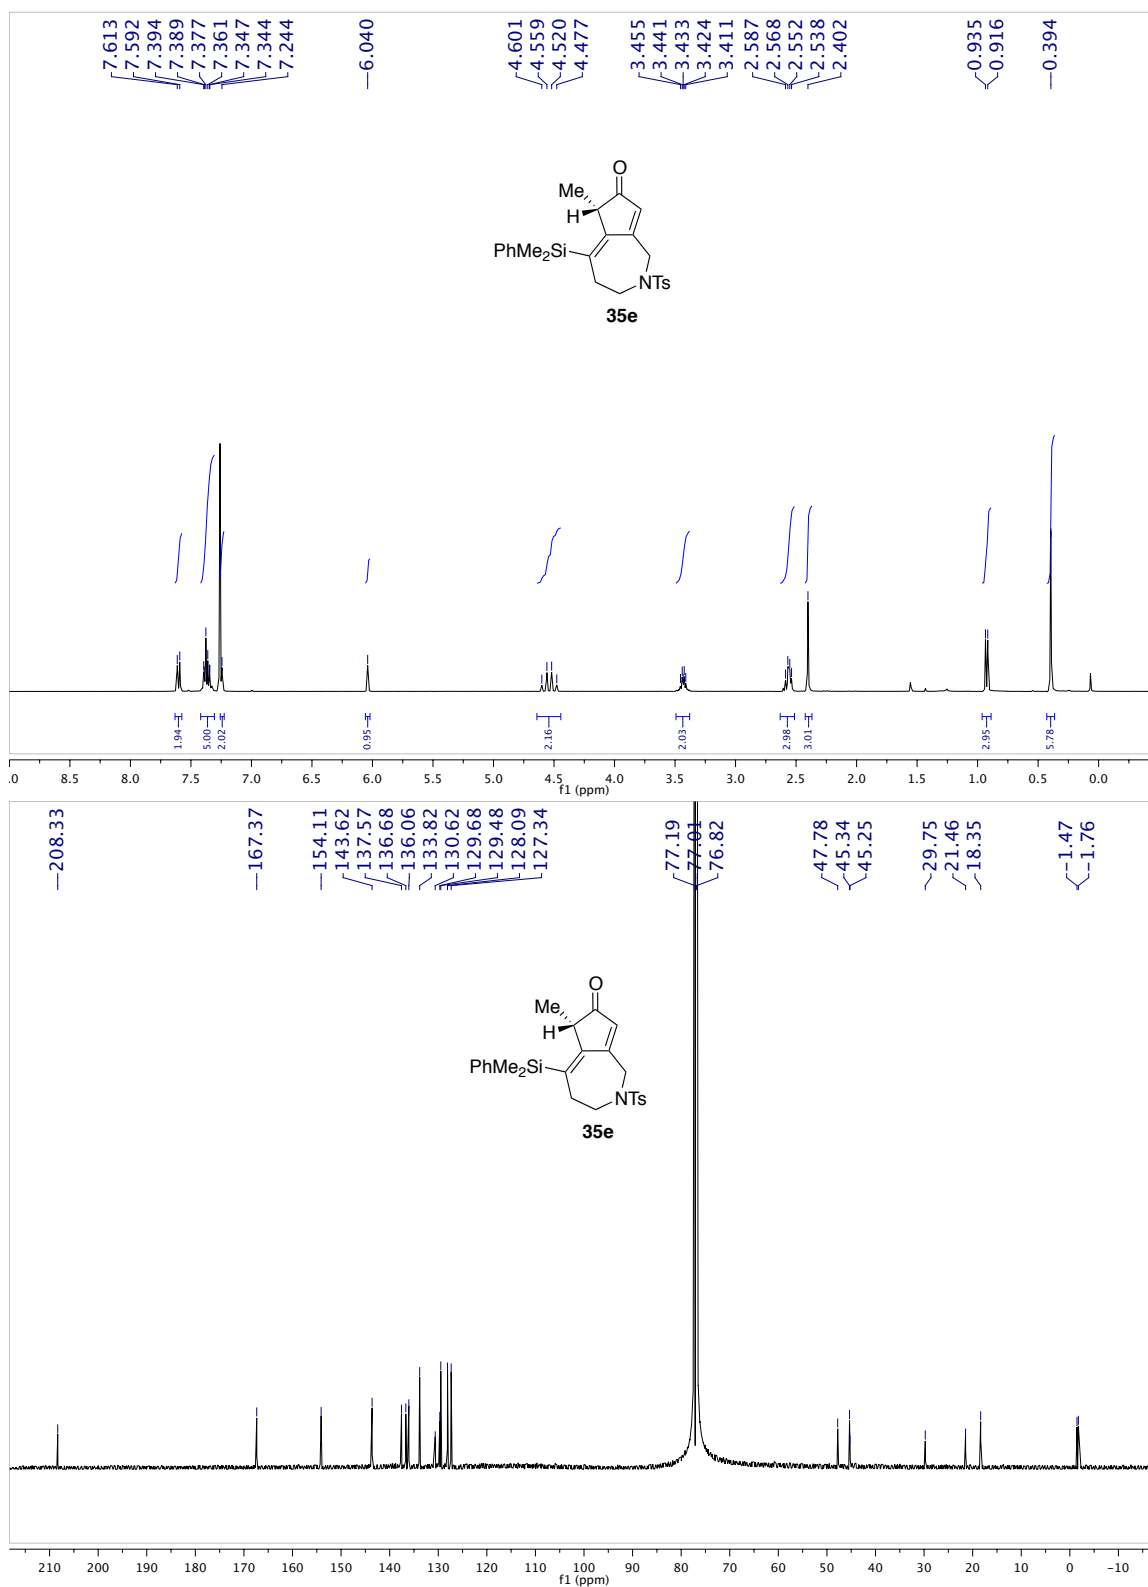

**5-(dimethyl(phenyl)silyl)-3-methylene-1-tosyl-4-vinyl-2,3,6,7-tetrahydro-1H-azepine (49):**

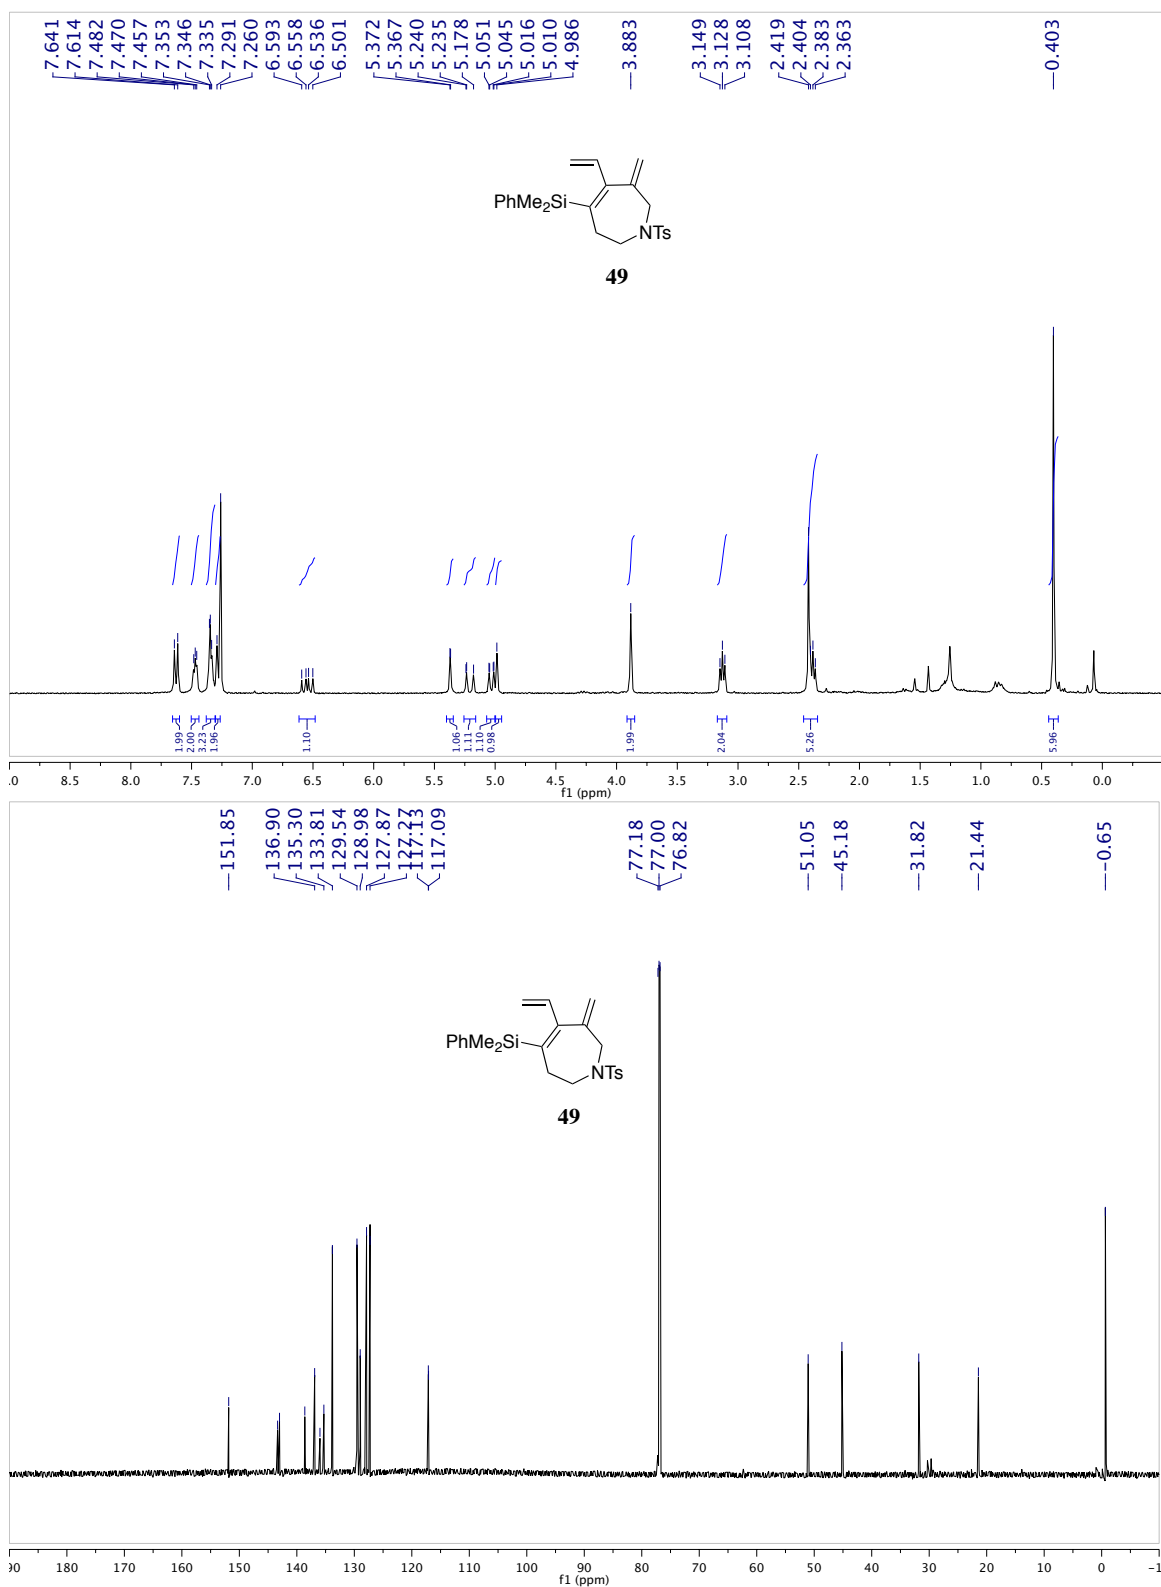

**(*R*)-*N*-(3-(dimethyl(phenyl)silyl)hexa-3,4-dien-1-yl)-4-methyl-*N*-(3-(trimethylsilyl)prop-2-yn-1-yl)benzenesulfonamide (13f):**

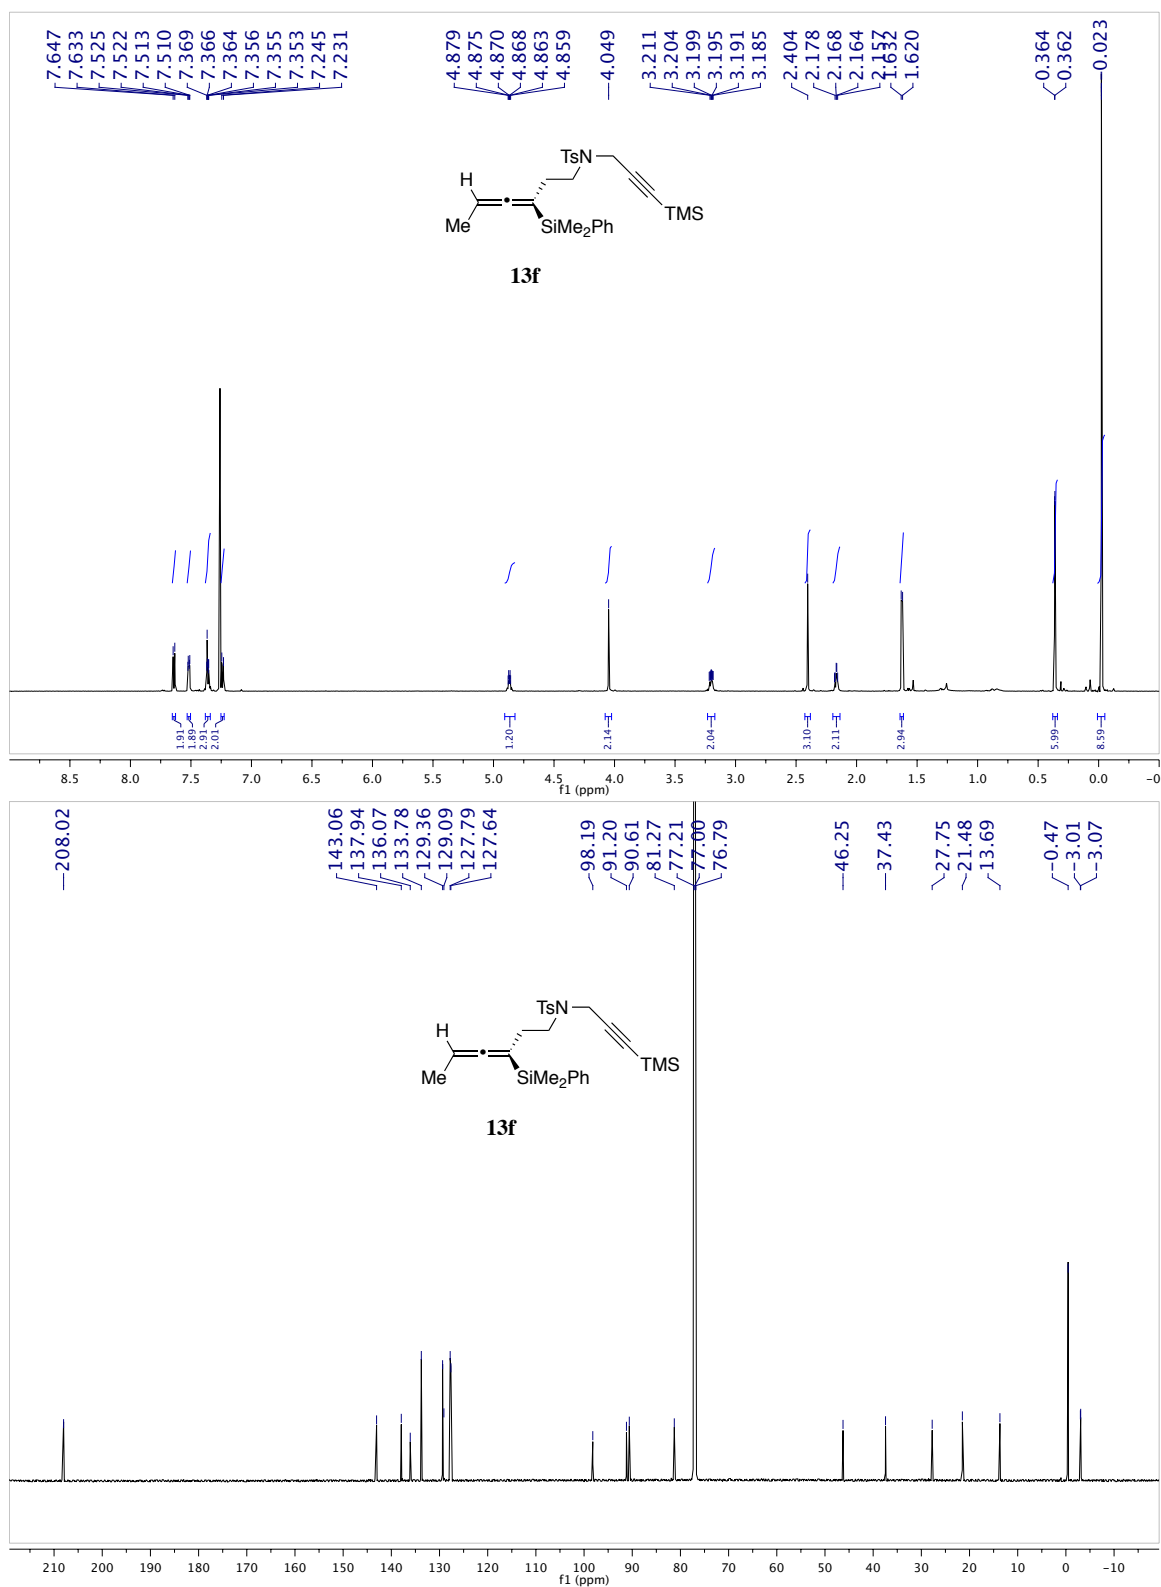

**(S)-5-(dimethyl(phenyl)silyl)-6-methyl-2-tosyl-8-(trimethylsilyl)-1,2,3,4-tetrahydrocyclopenta[c]azepin-7(6H)-one (35f):**

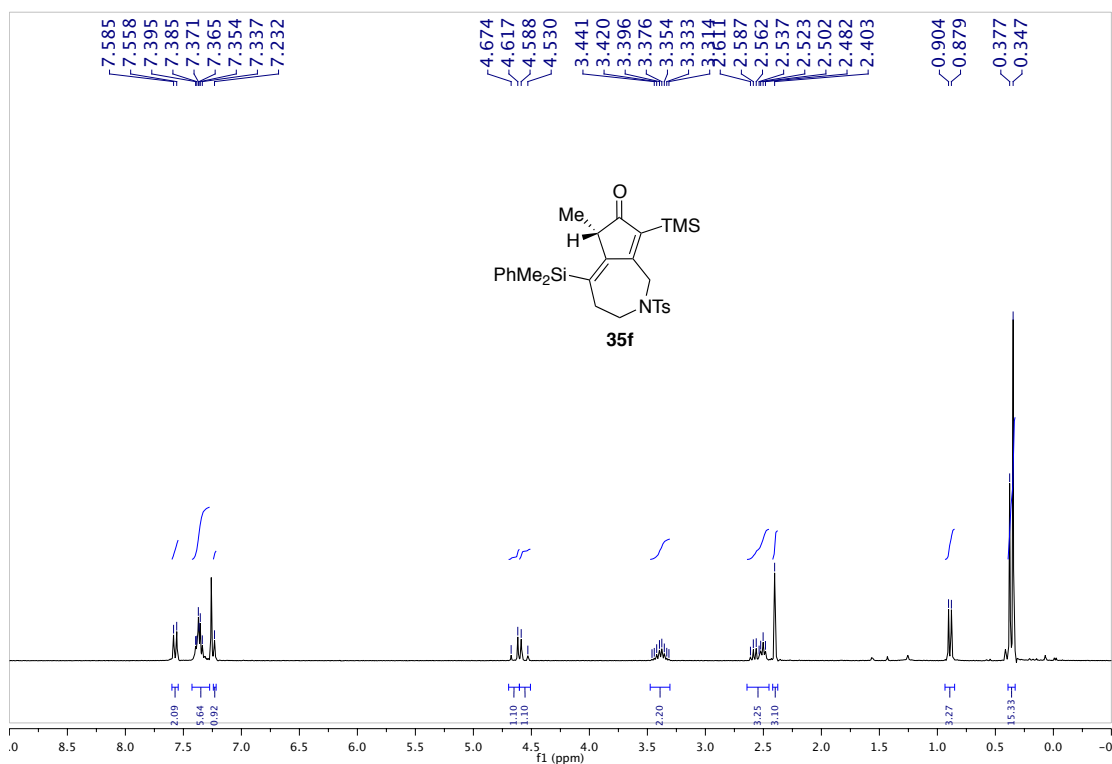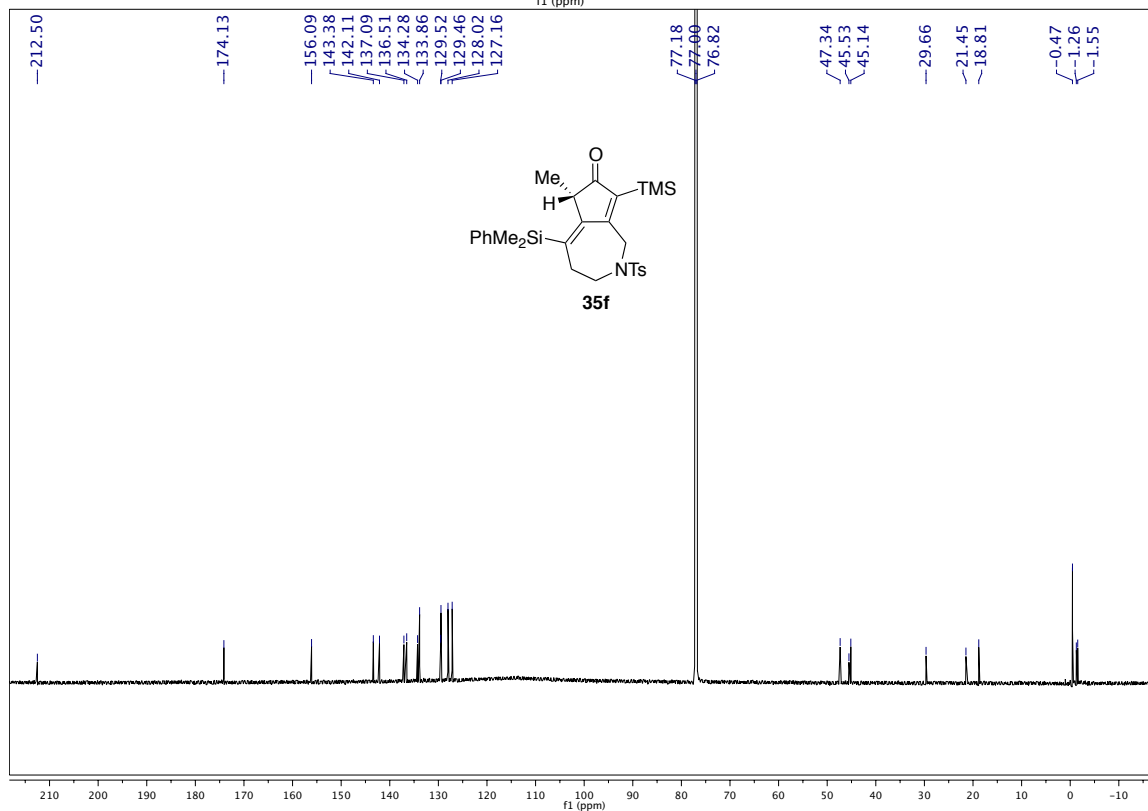

**(*R*)-*N*-(3-(dimethyl(phenyl)silyl)hexa-3,4-dien-1-yl)-4-methyl-*N*-(3-phenylprop-2-yn-1-yl) benzenesulfonamide (13d):**

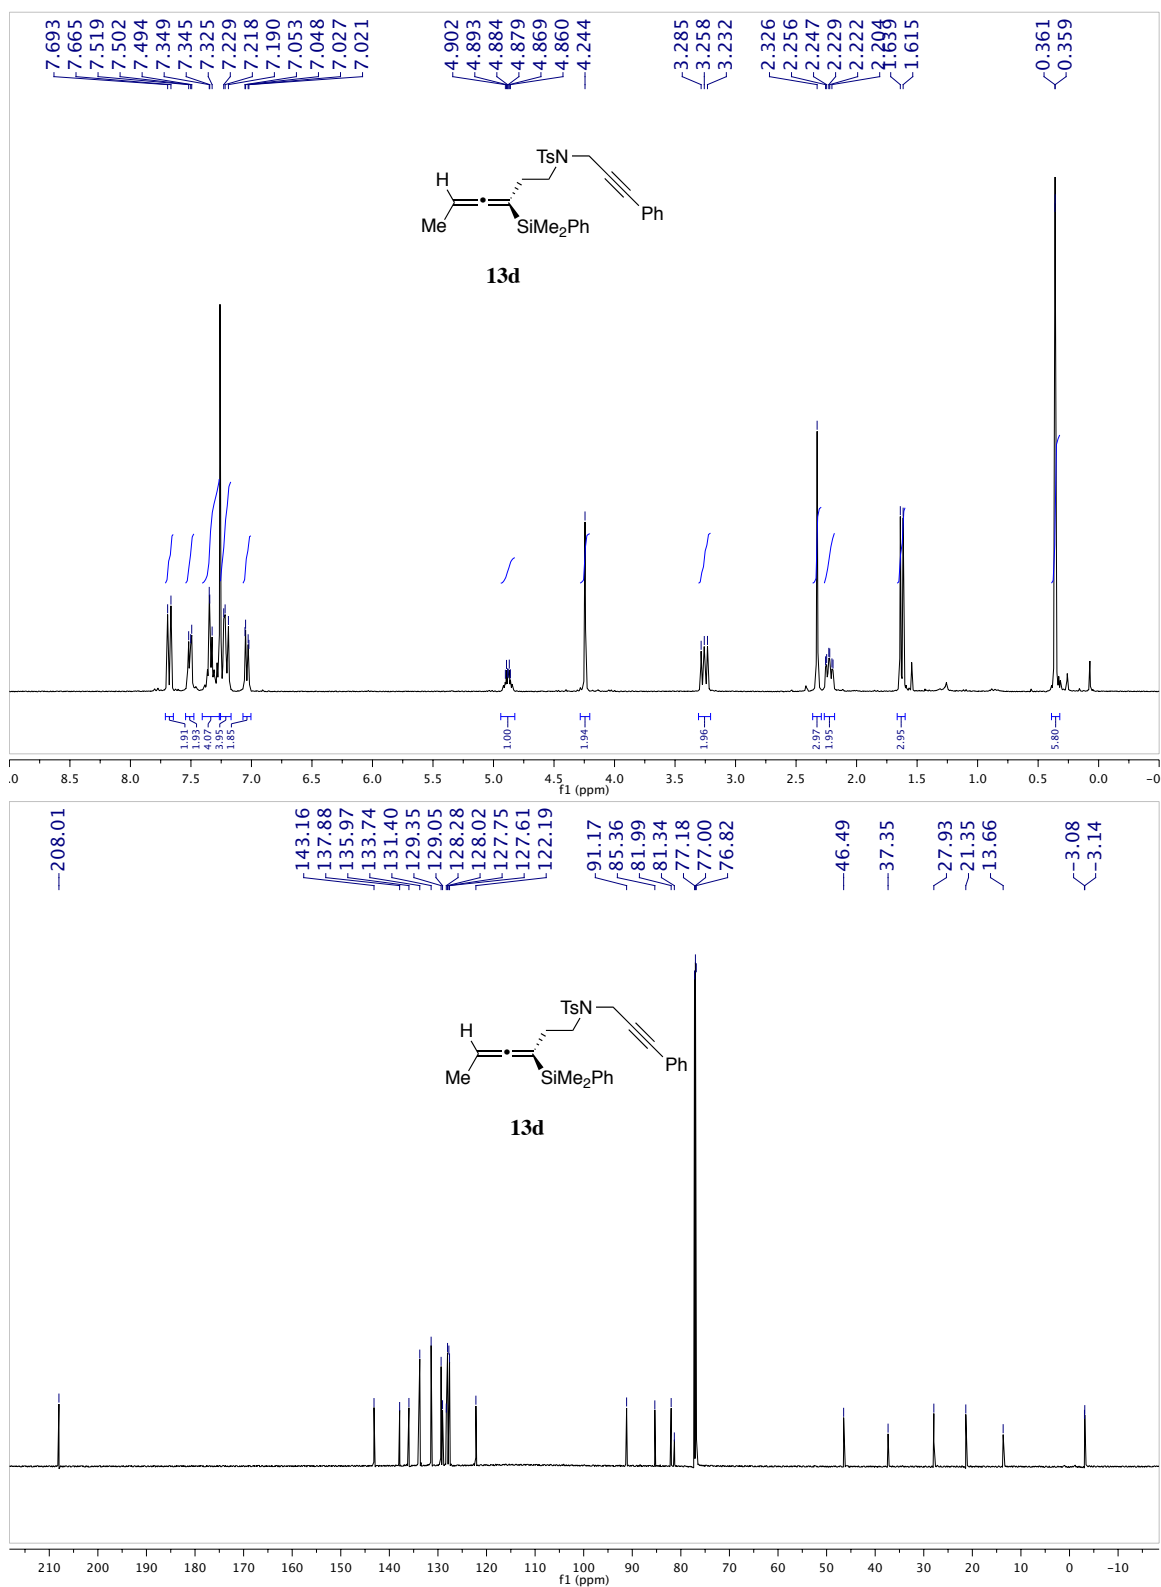



**(S)-5-(dimethyl(phenyl)silyl)-6-methyl-8-phenyl-2-tosyl-1,2,3,4-tetrahydro  
cyclopenta[c]azepin-7(6H)-one (35d):**

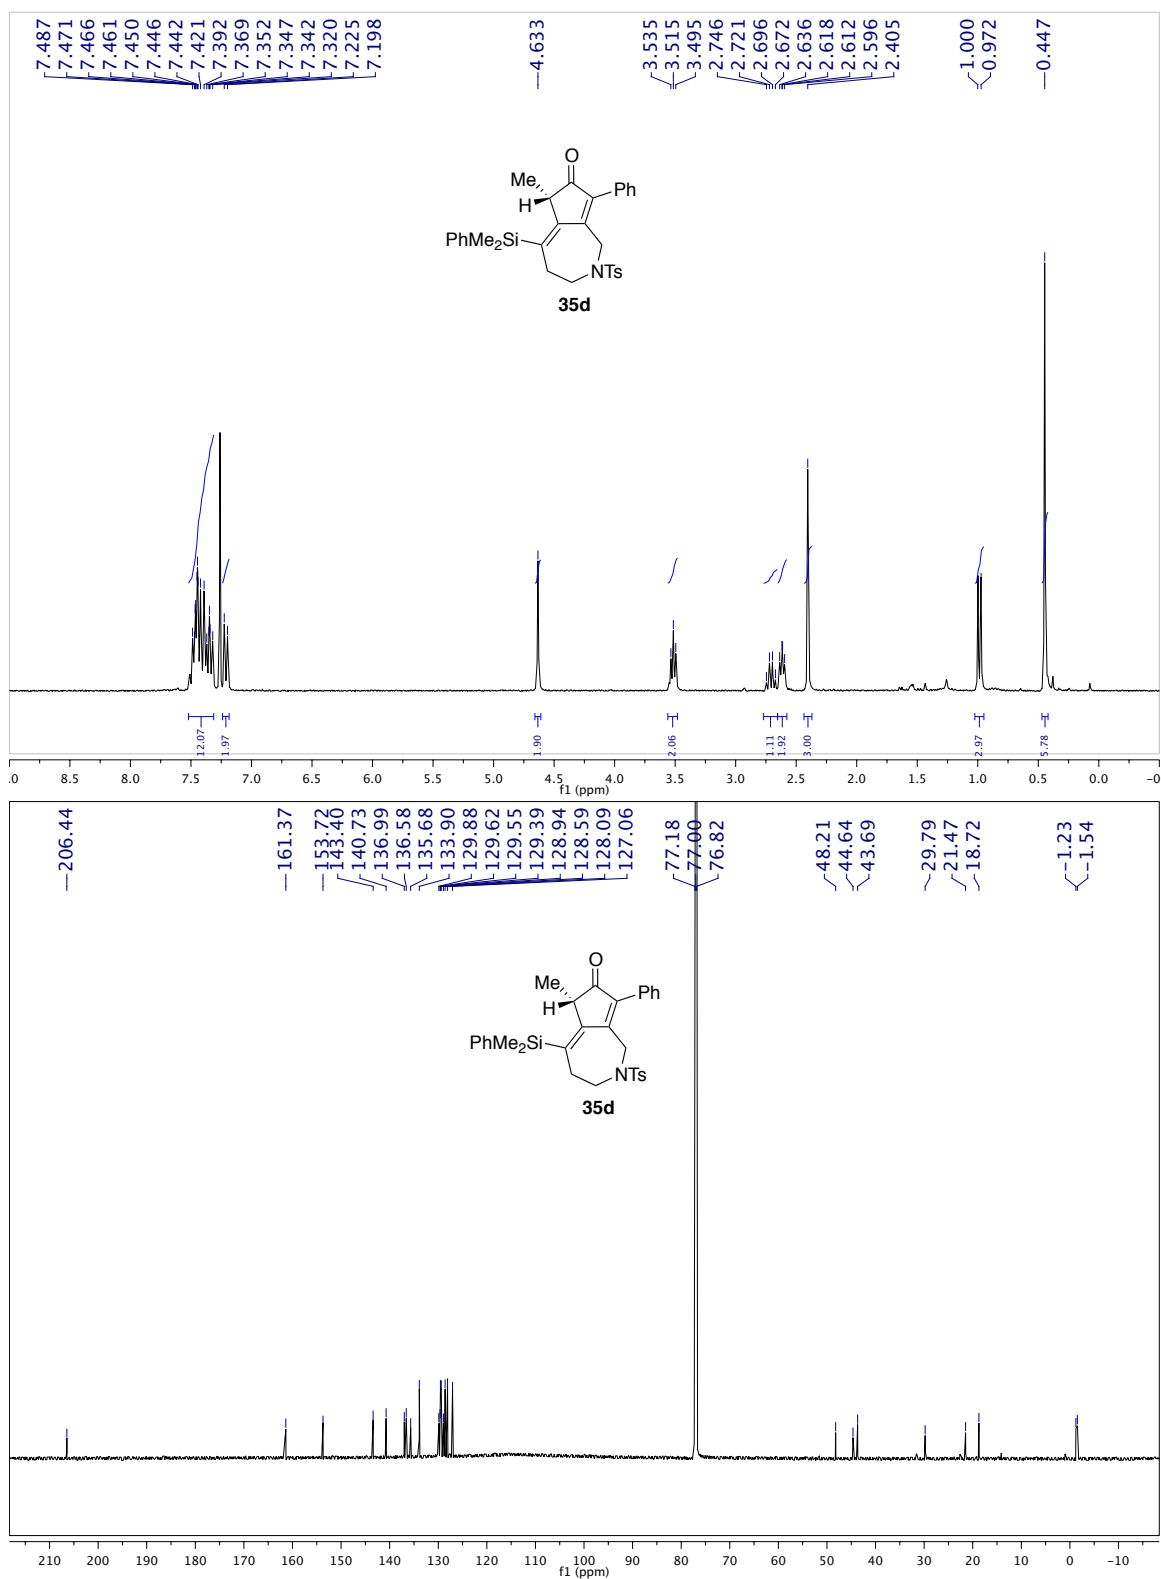

**4-methyl-N-(3-(thiophen-3-yl)prop-2-yn-1-yl)benzenesulfonamide (30a):**

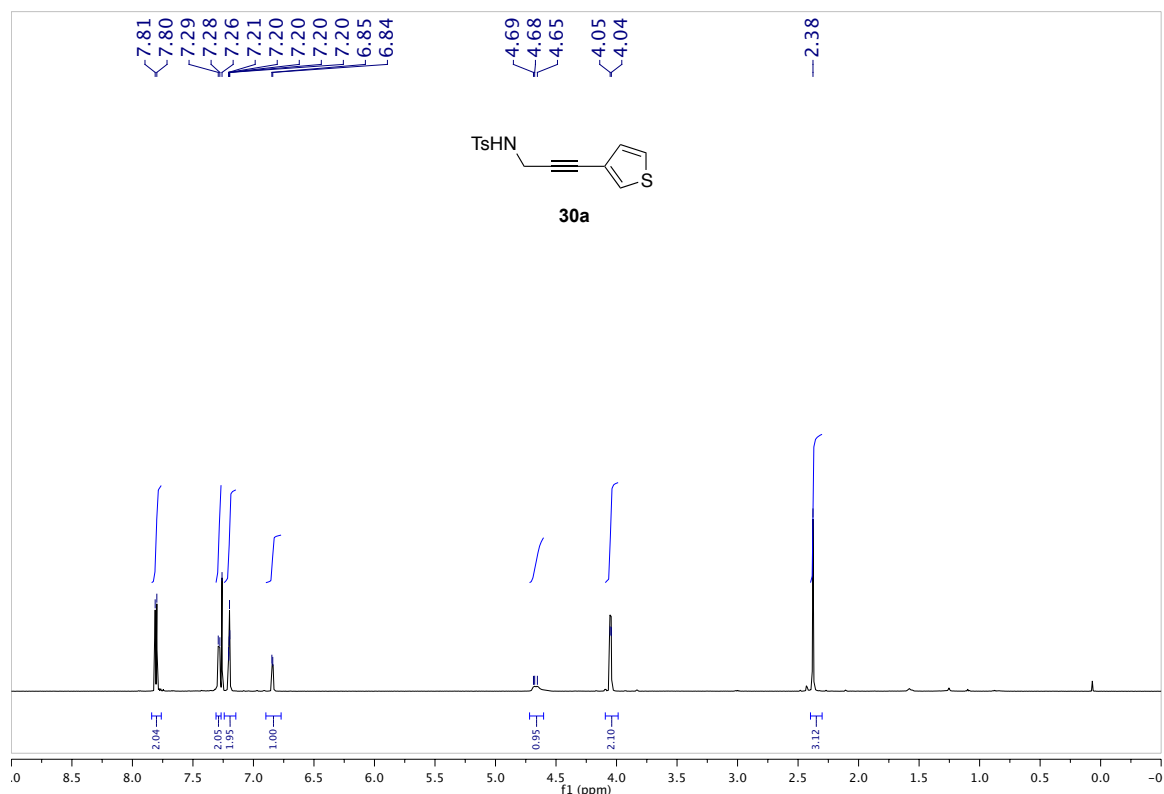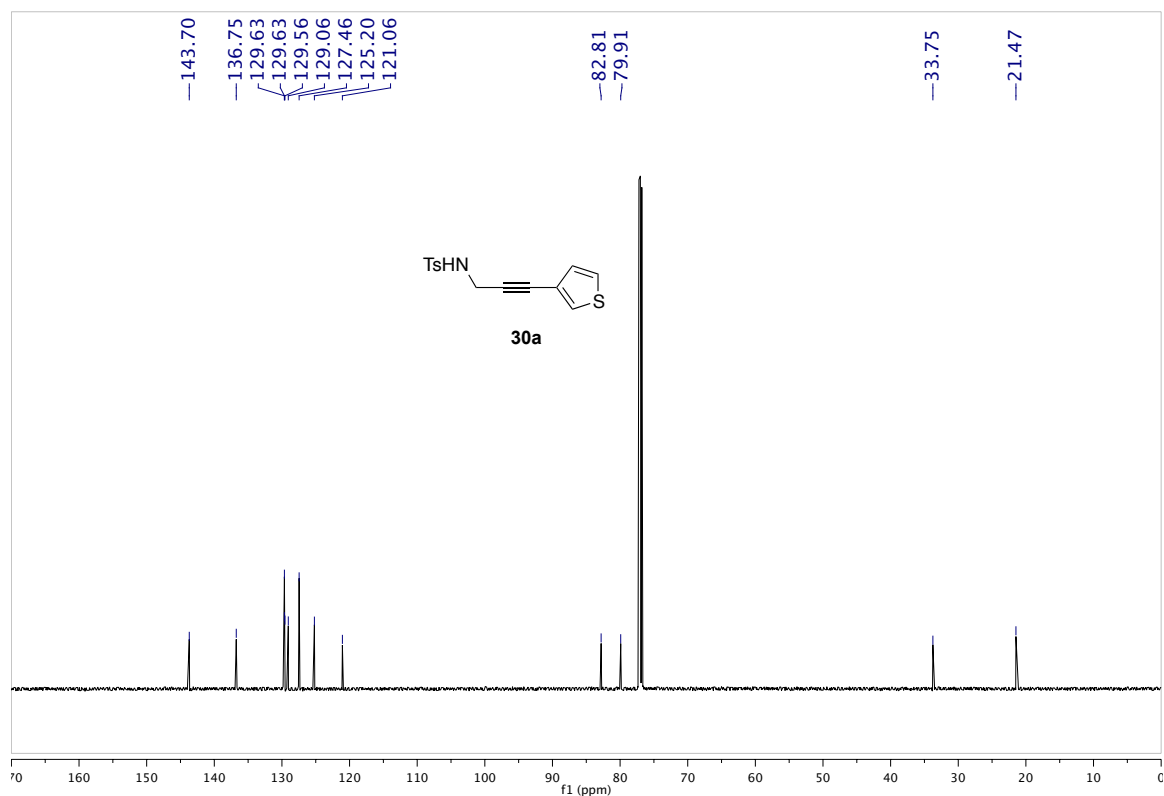

**(*R*)-*N*-(3-(dimethyl(phenyl)silyl)hexa-3,4-dien-1-yl)-4-methyl-*N*-(3-(thiophen-3-yl)prop-2-yn-1-yl)benzenesulfonamide (13a):**

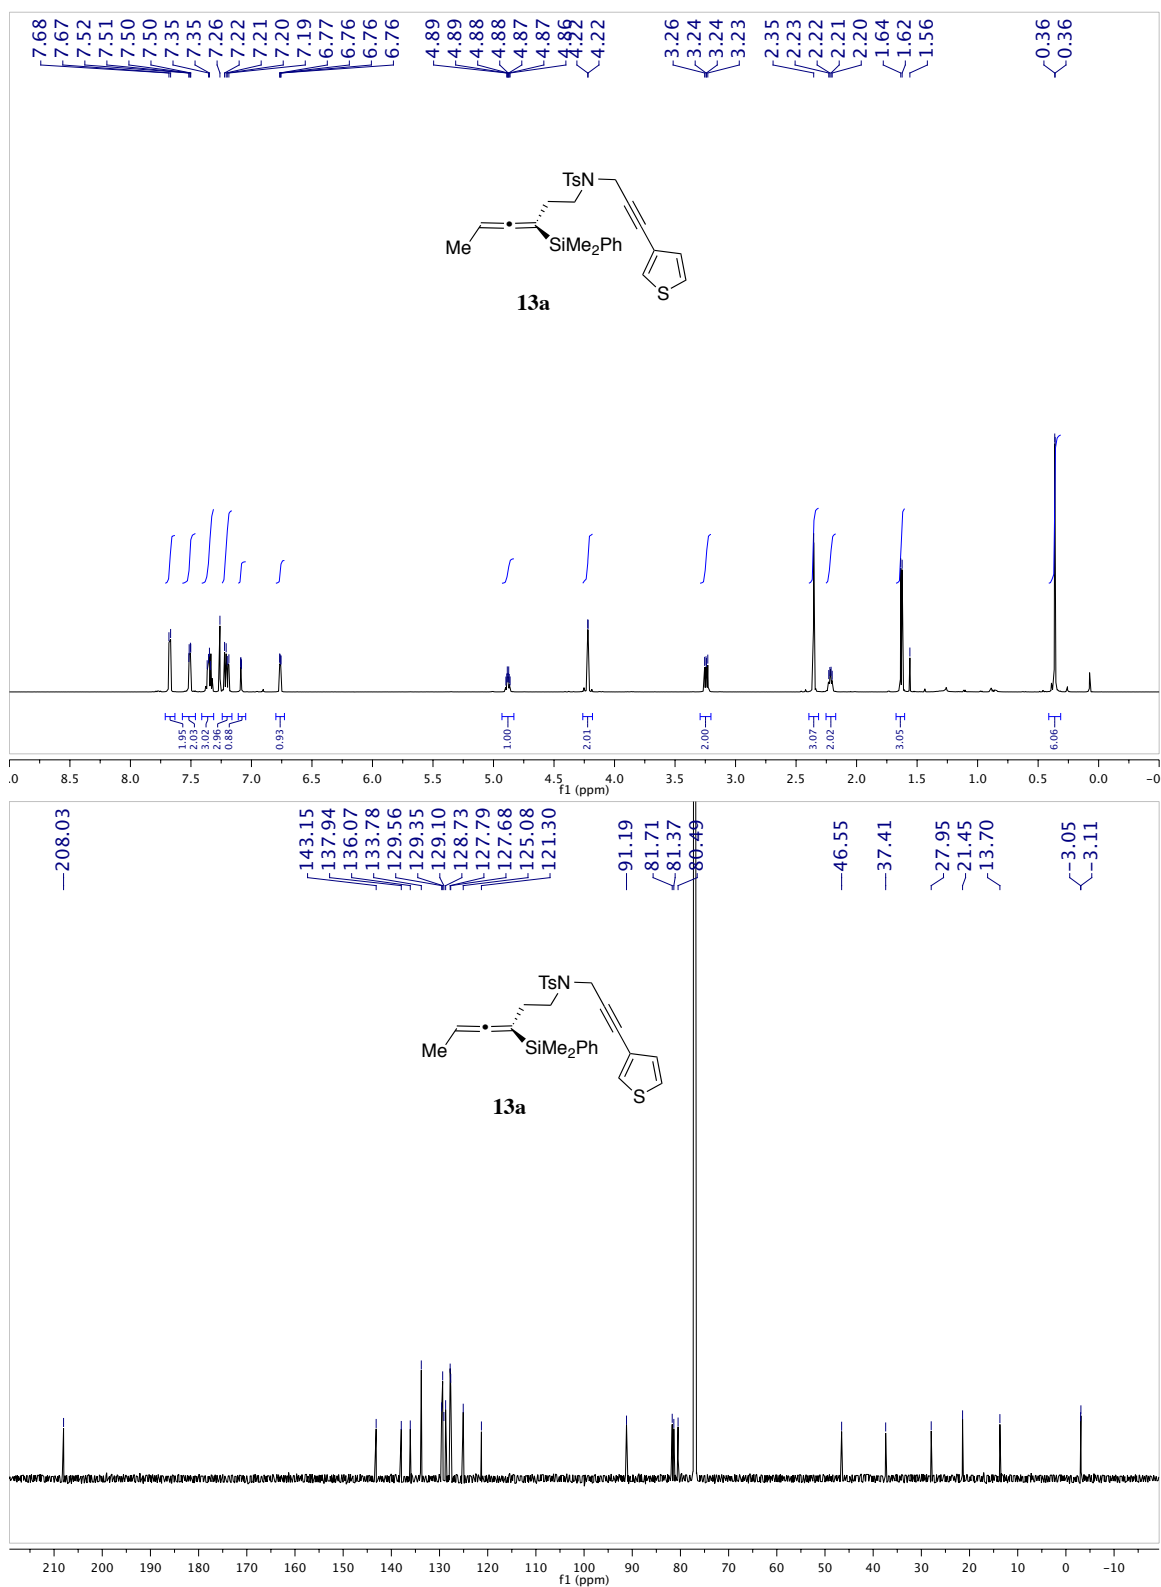

**(S)-5-(dimethyl(phenyl)silyl)-6-methyl-8-(thiophen-3-yl)-2-tosyl-1,2,3,4-tetrahydrocyclopenta[c]azepin-7(6H)-one (35a):**

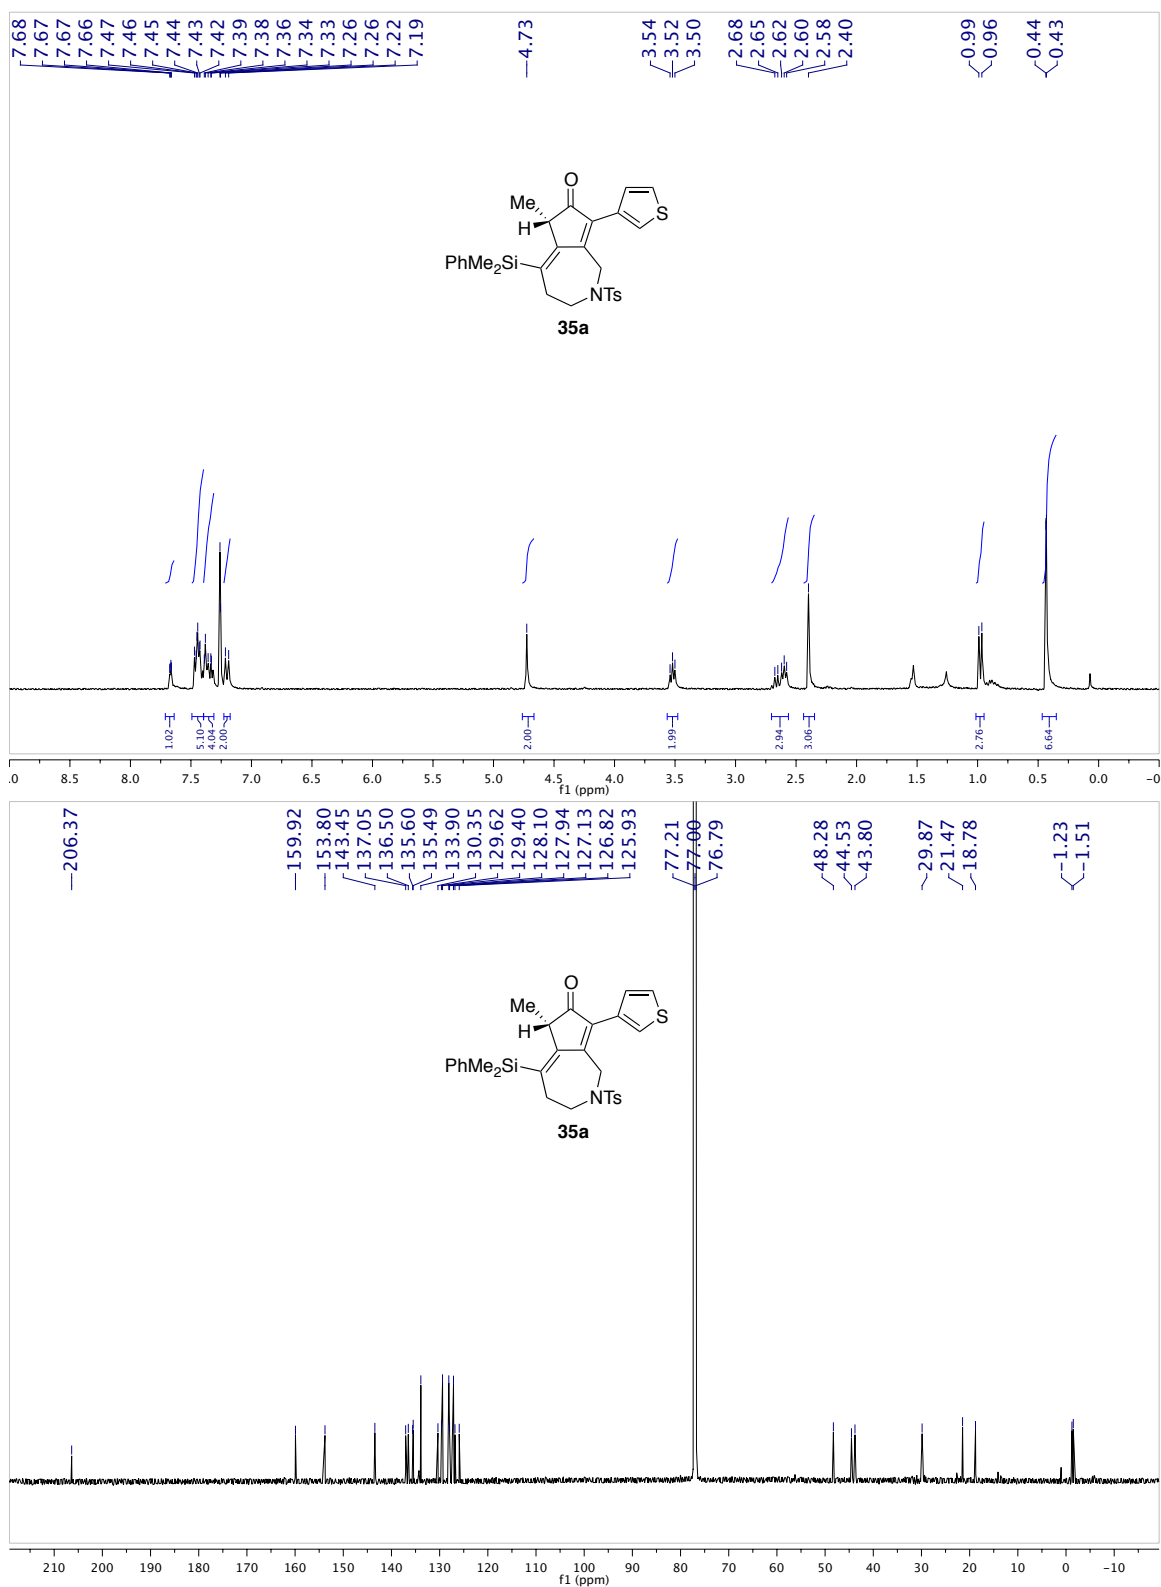

**4-methyl-N-(3-(thiophen-2-yl)prop-2-yn-1-yl)benzenesulfonamide (30b):**

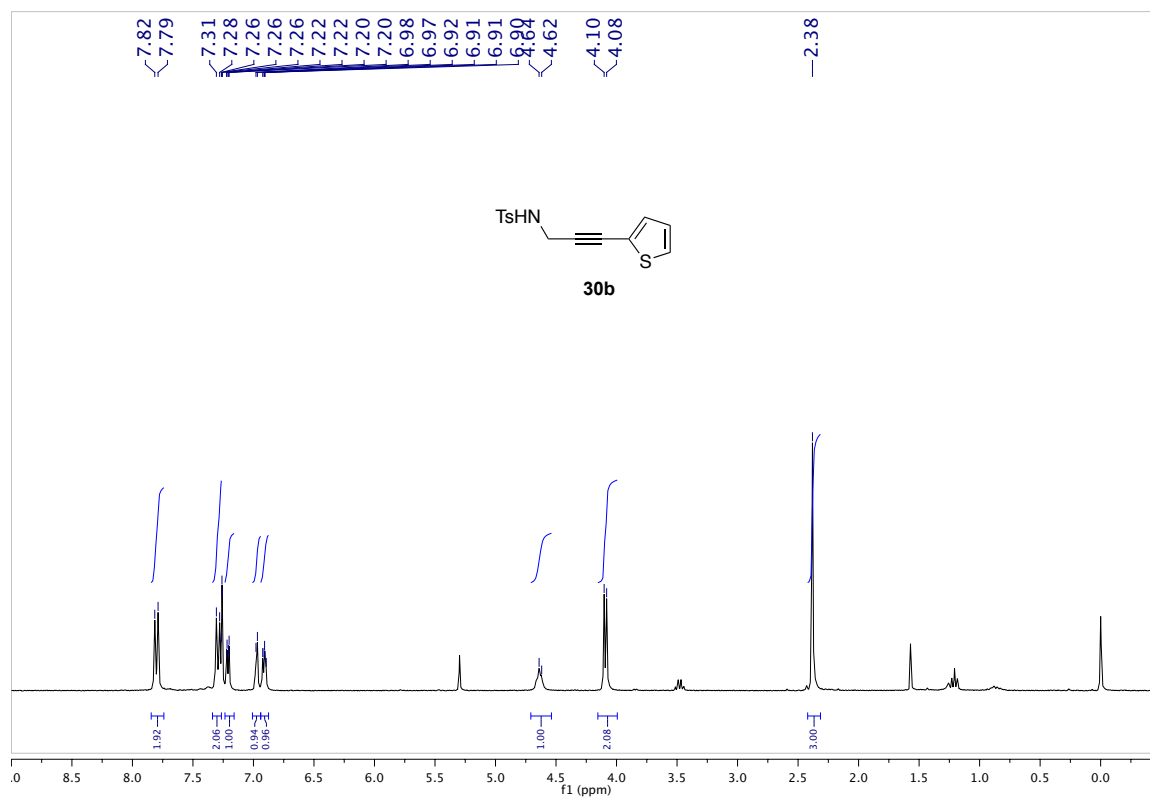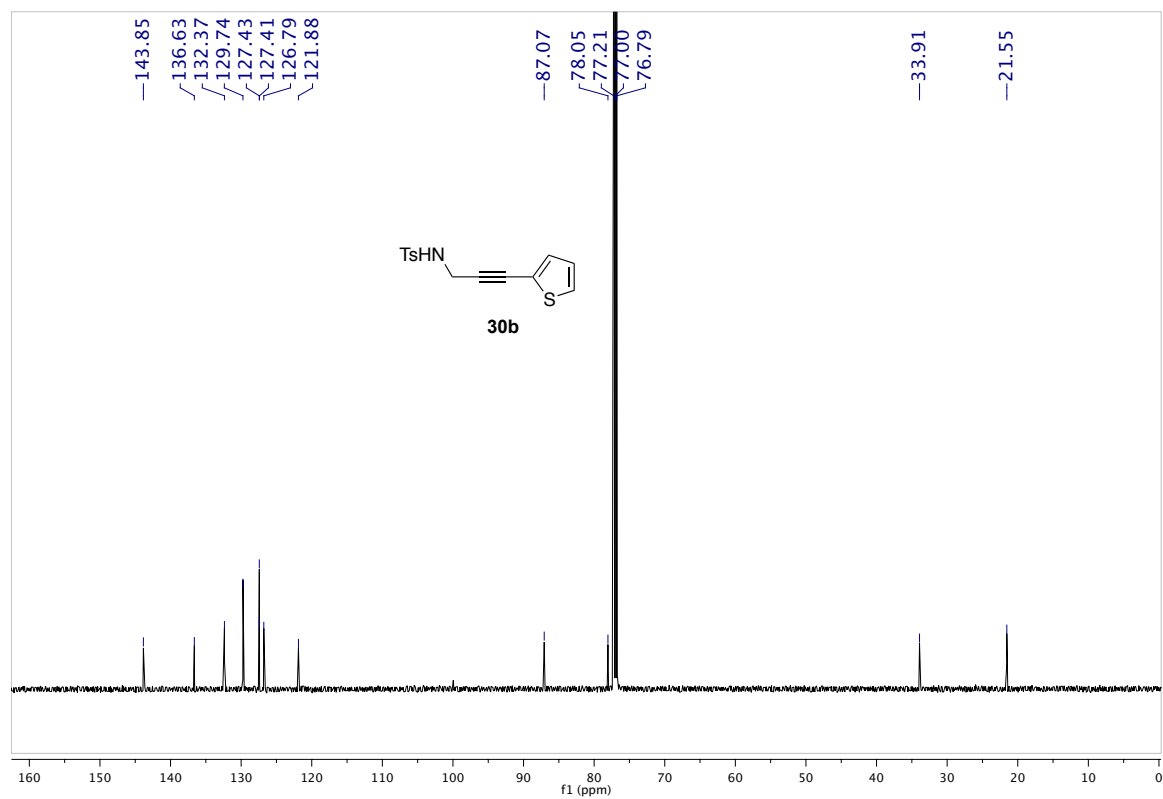

Chemical structure of **13b** is shown above the spectrum. The structure is a chiral molecule with a central carbon atom bonded to a methyl group (Me), a dimethylphenylsilyl group (SiMe<sub>2</sub>Ph), a 4-methylphenyl group (TsN), and a 2-(4-methylphenyl)ethyl group.

<sup>1</sup>H NMR spectrum (CDCl<sub>3</sub>) of **13b** is shown below. The x-axis represents the chemical shift in ppm, ranging from 0 to 10. The spectrum displays several peaks corresponding to the protons in the molecule, with integration values indicated below the peaks.

Peak list (ppm): 7.68, 7.65, 7.52, 7.51, 7.50, 7.36, 7.35, 7.34, 7.33, 7.26, 7.24, 7.22, 7.21, 7.20, 6.91, 6.90, 4.90, 4.89, 4.88, 4.87, 4.86, 4.25, 3.25, 3.23, 3.20, 2.36, 2.24, 2.23, 2.21, 2.19, 2.18, 1.64, 1.62, 0.36.

Integration values (from left to right): 1.97, 3.04, 2.94, 1.90, 1.00, 2.00, 1.97, 3.02, 1.99, 3.00, 5.91.

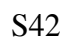

**(S)-5-(dimethyl(phenyl)silyl)-6-methyl-8-(thiophen-2-yl)-2-tosyl-1,2,3,4-tetrahydrocyclopenta[c]azepin-7(6H)-one (35b):**

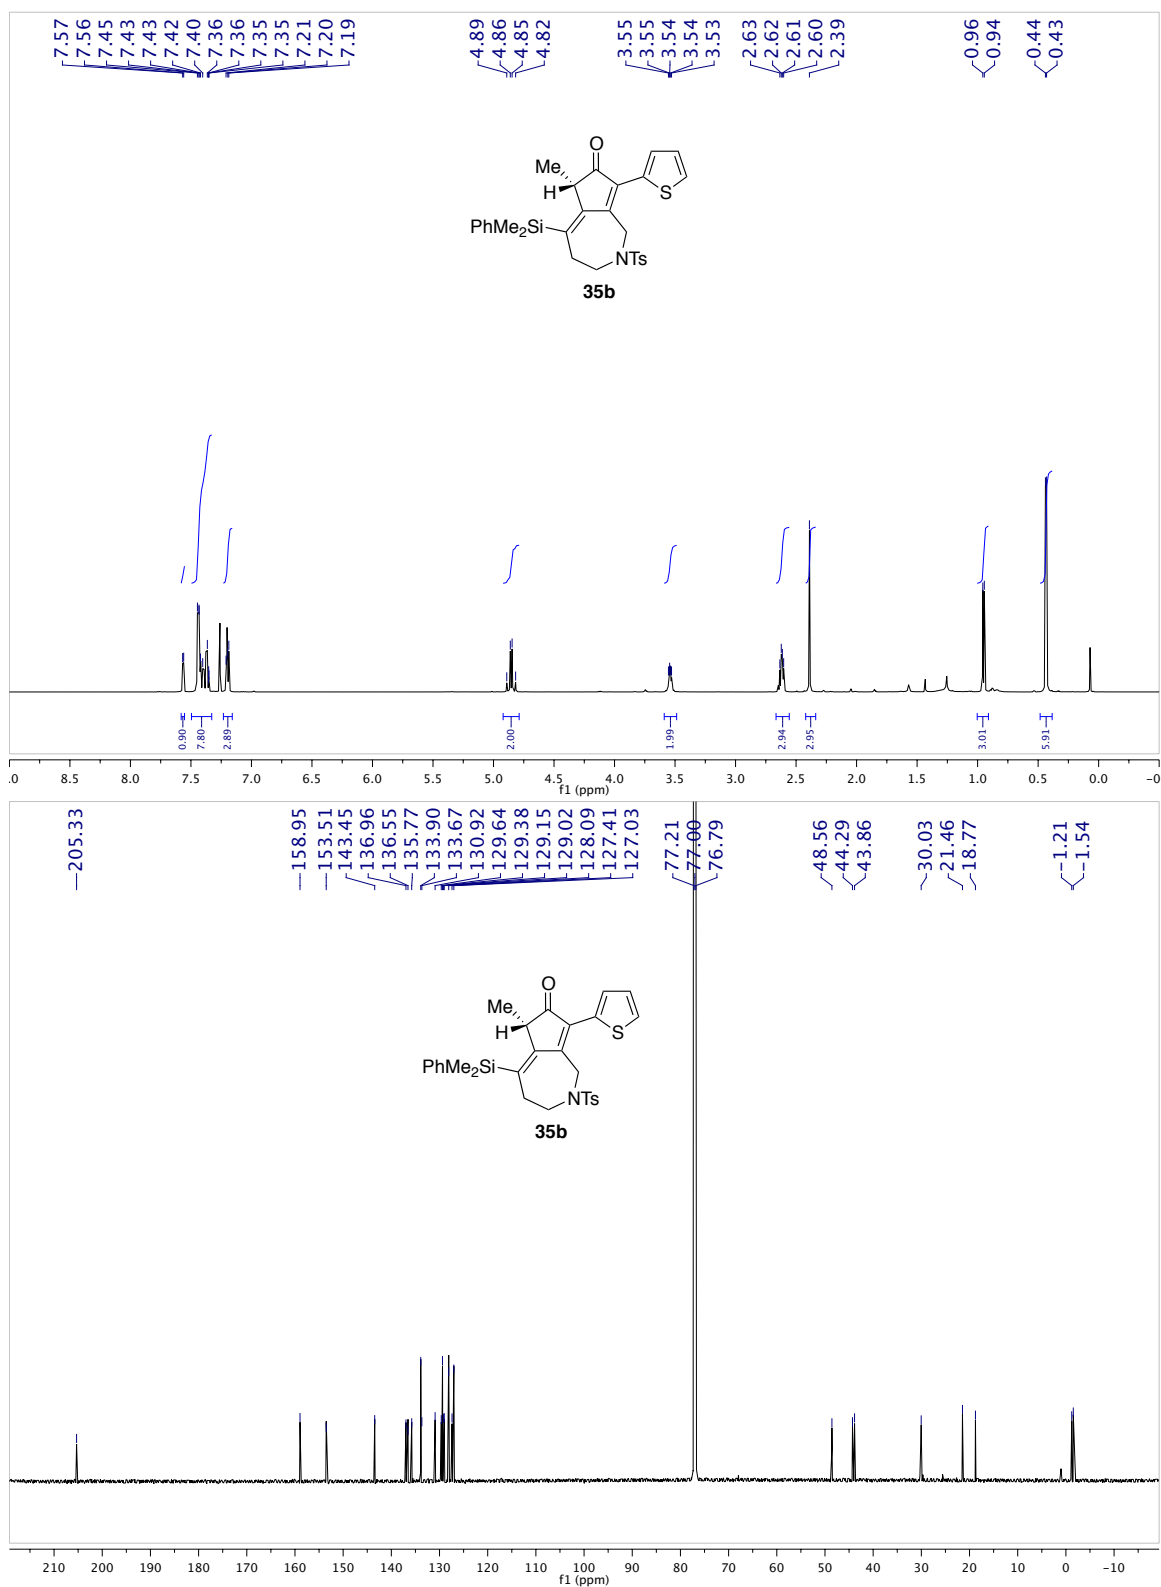

***tert*-butyl (3-cyclopropylprop-2-yn-1-yl)(tosyl)carbamate (50):**

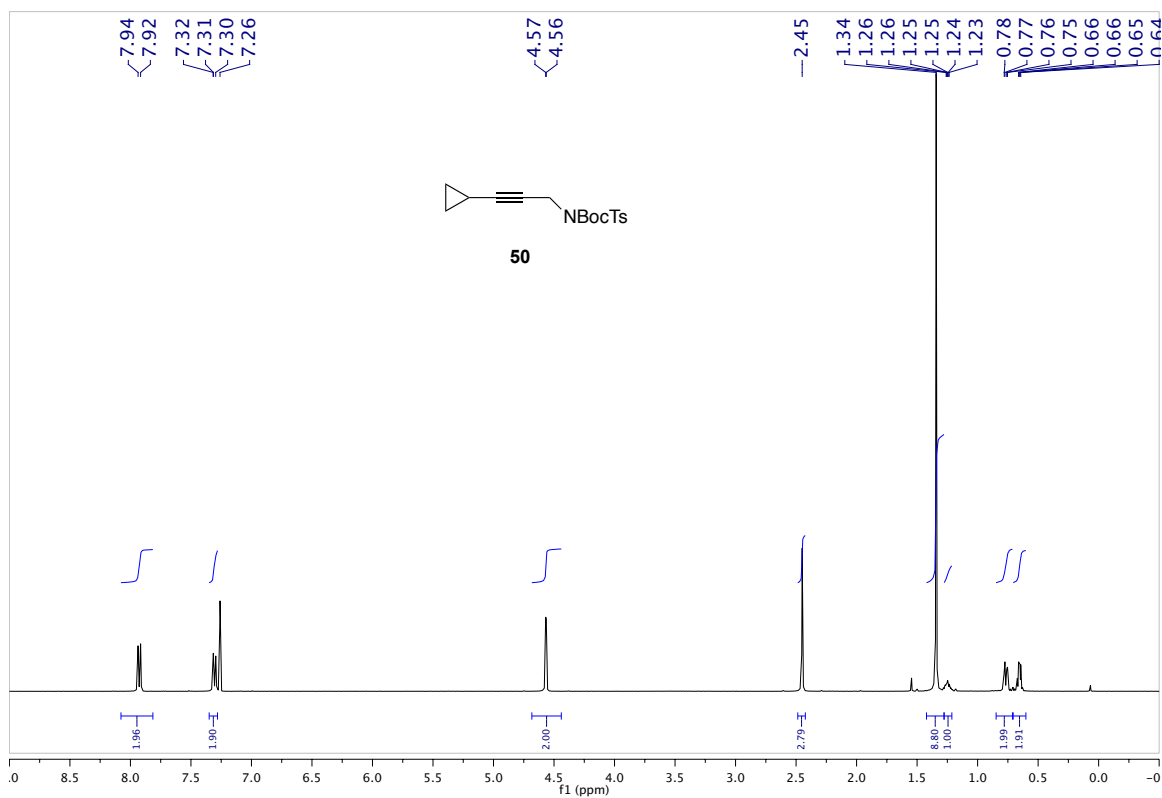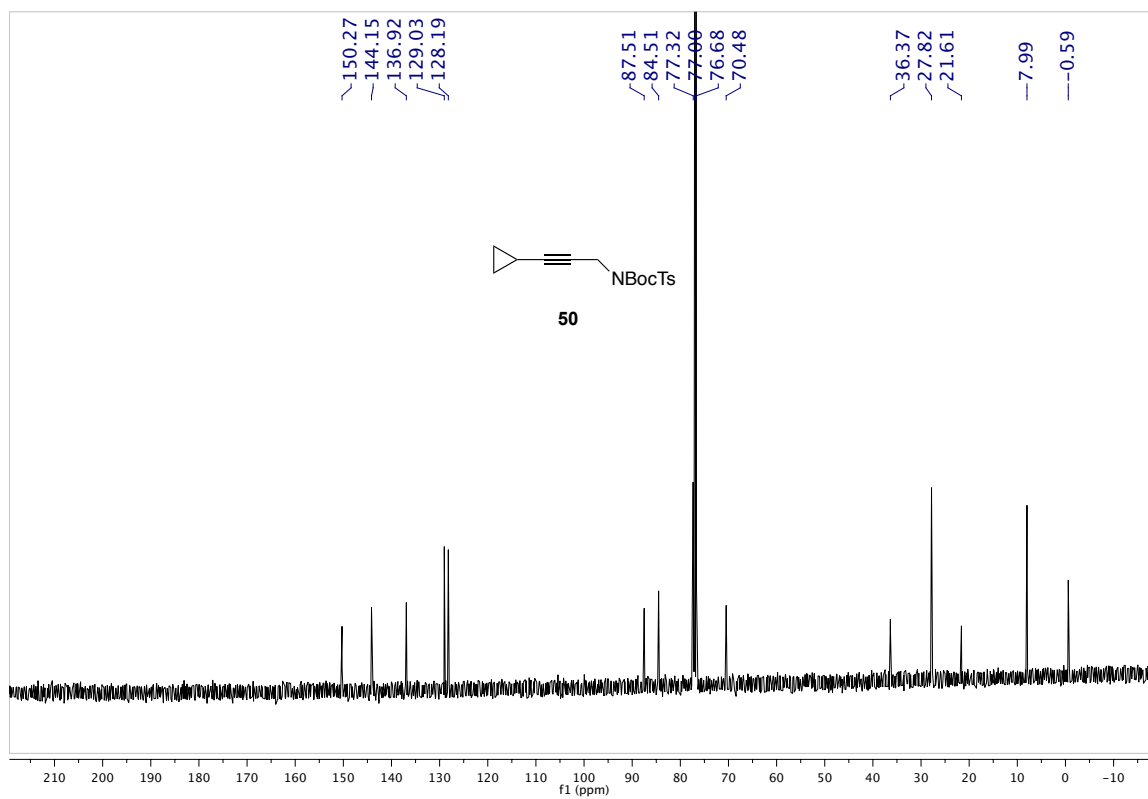



***N*-(3-cyclopropylprop-2-yn-1-yl)-4-methylbenzenesulfonamide (30g):**

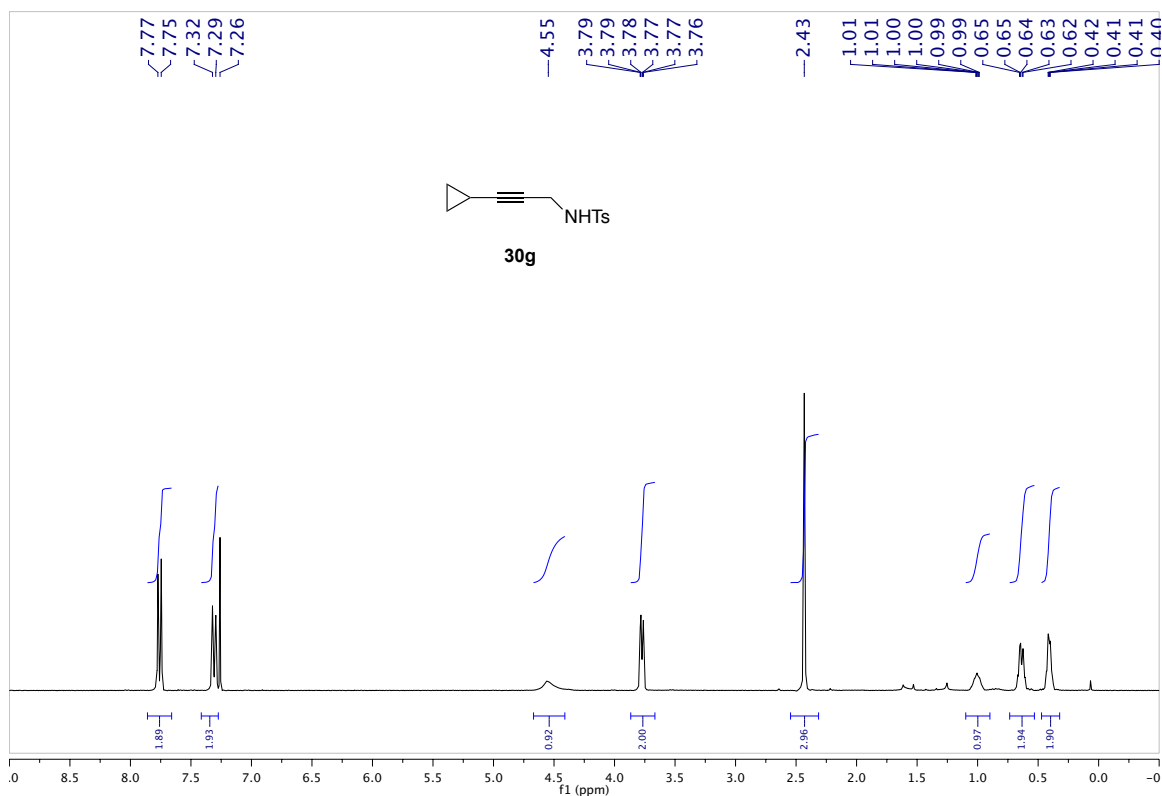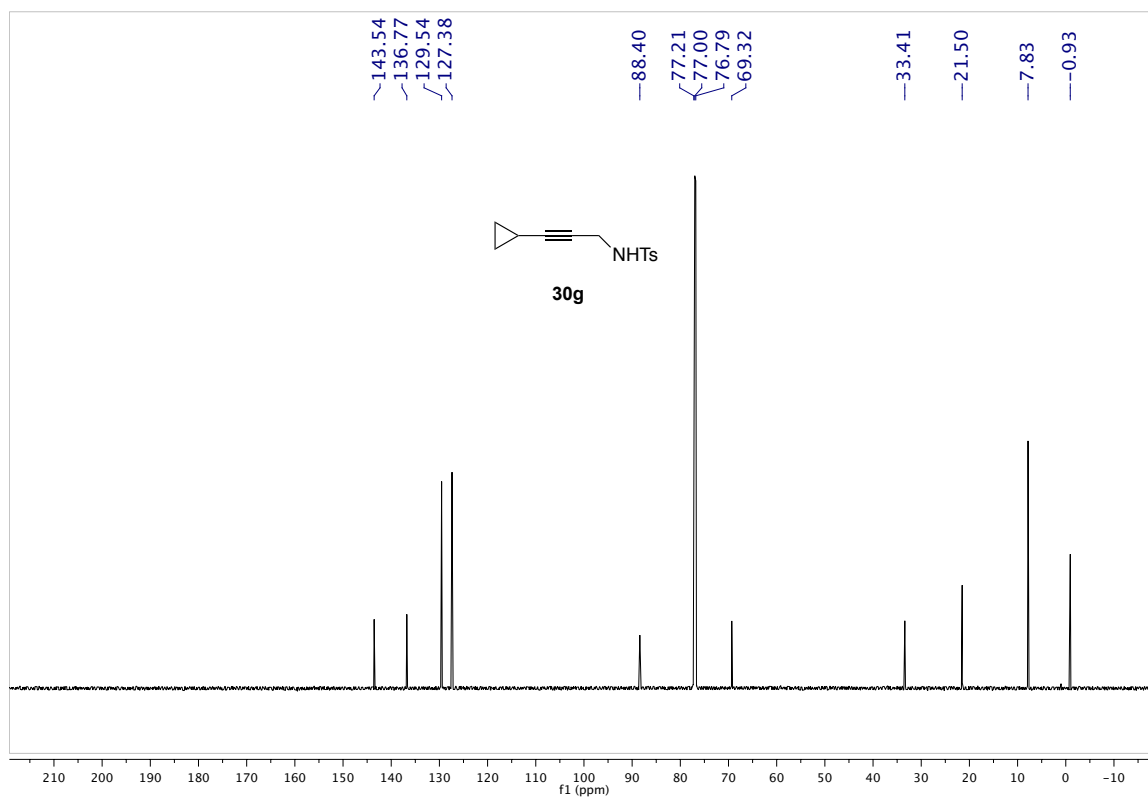

**(*R*<sub>a</sub>)-*N*-(3-cyclopropylprop-2-yn-1-yl)-*N*-(3-(dimethyl(phenyl)silyl)hexa-3,4-dien-1-yl)-4-methylbenzenesulfonamide (13g):**

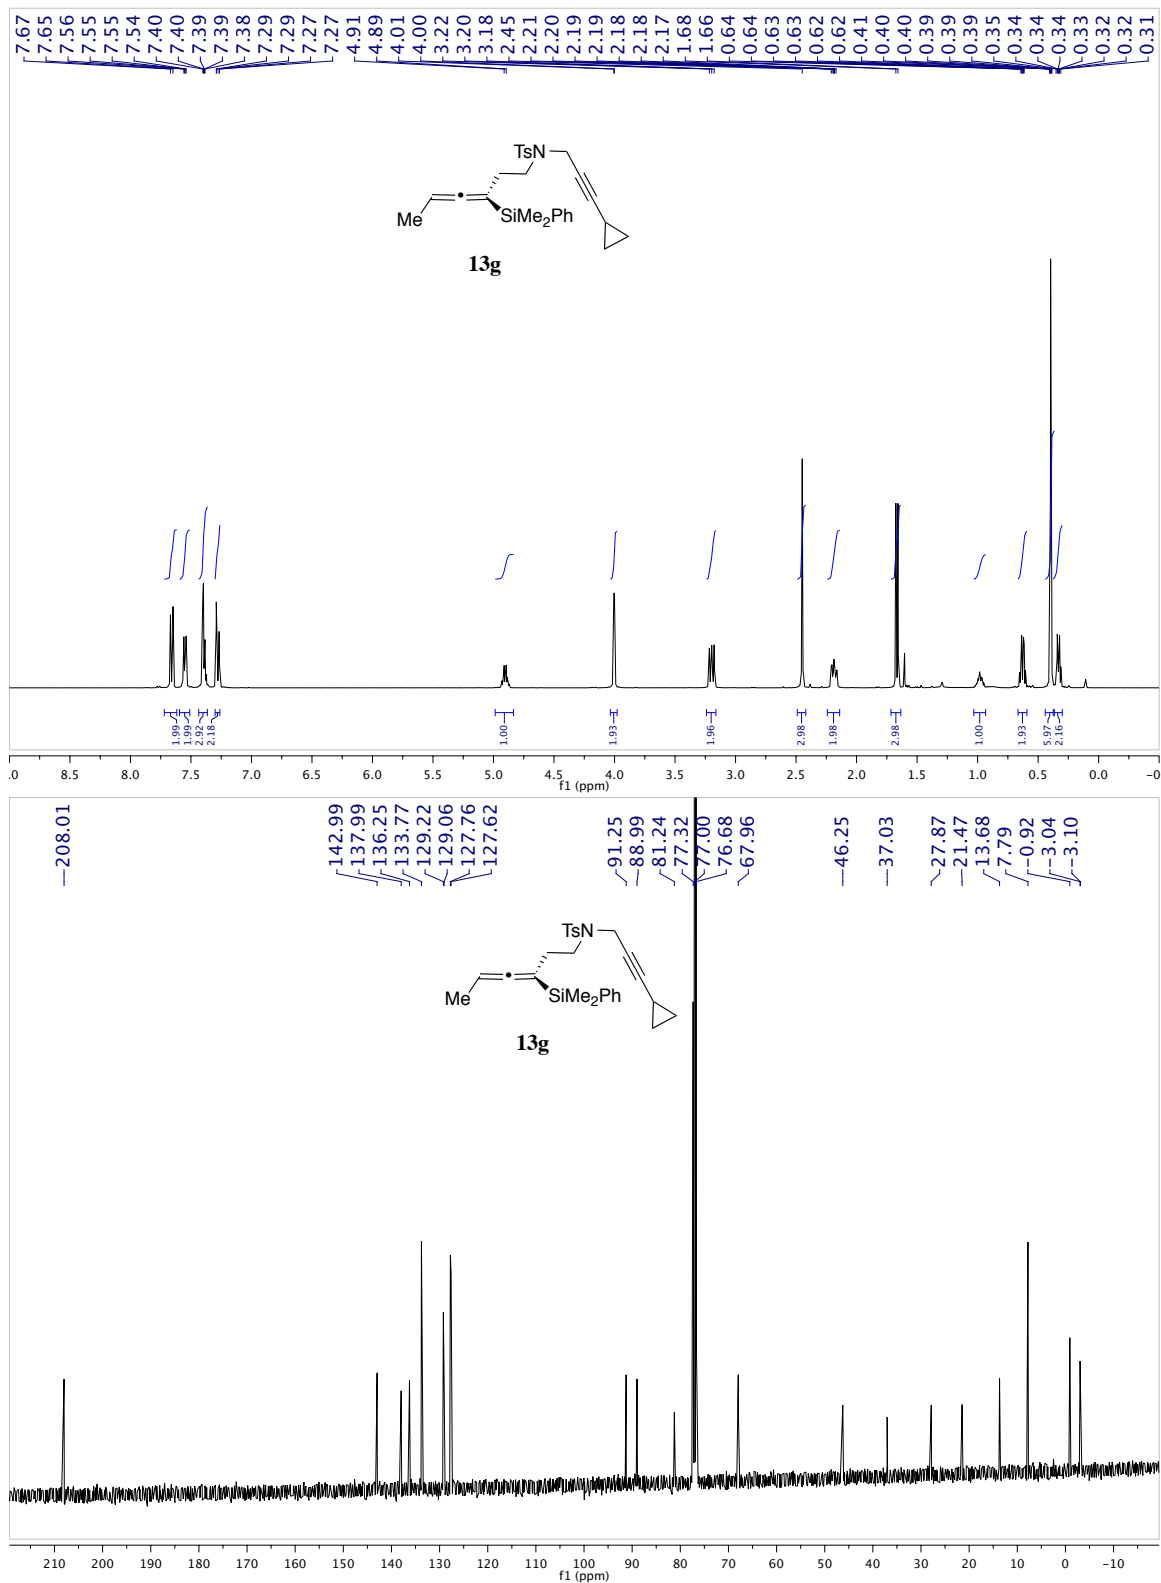

**(S)-8-cyclopropyl-5-(dimethyl(phenyl)silyl)-6-methyl-2-tosyl-1,2,3,4-tetrahydrocyclopenta[c]azepin-7(6H)-one (35g):**

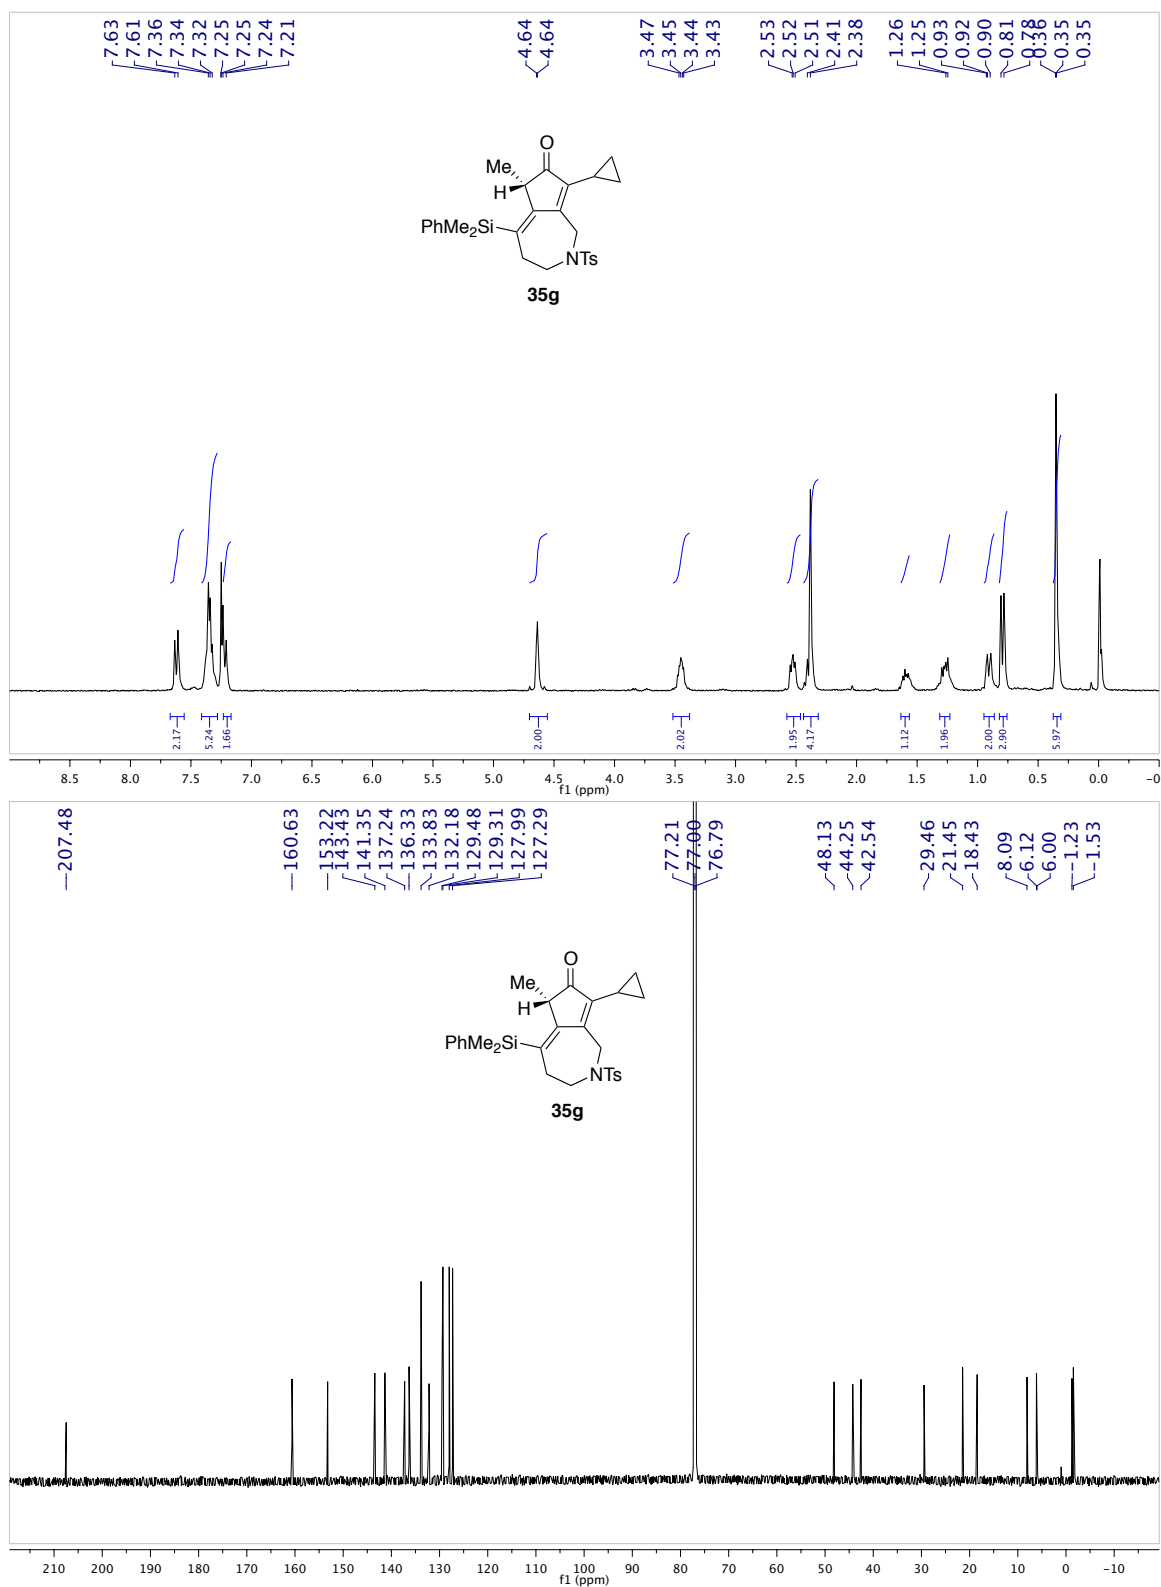

**(*R*<sub>a</sub>)-*N*-(hexa-3,4-dien-1-yl)-4-methyl-*N*-(3-phenylprop-2-yn-1-yl)benzene**

**sulfonamide (14d):**

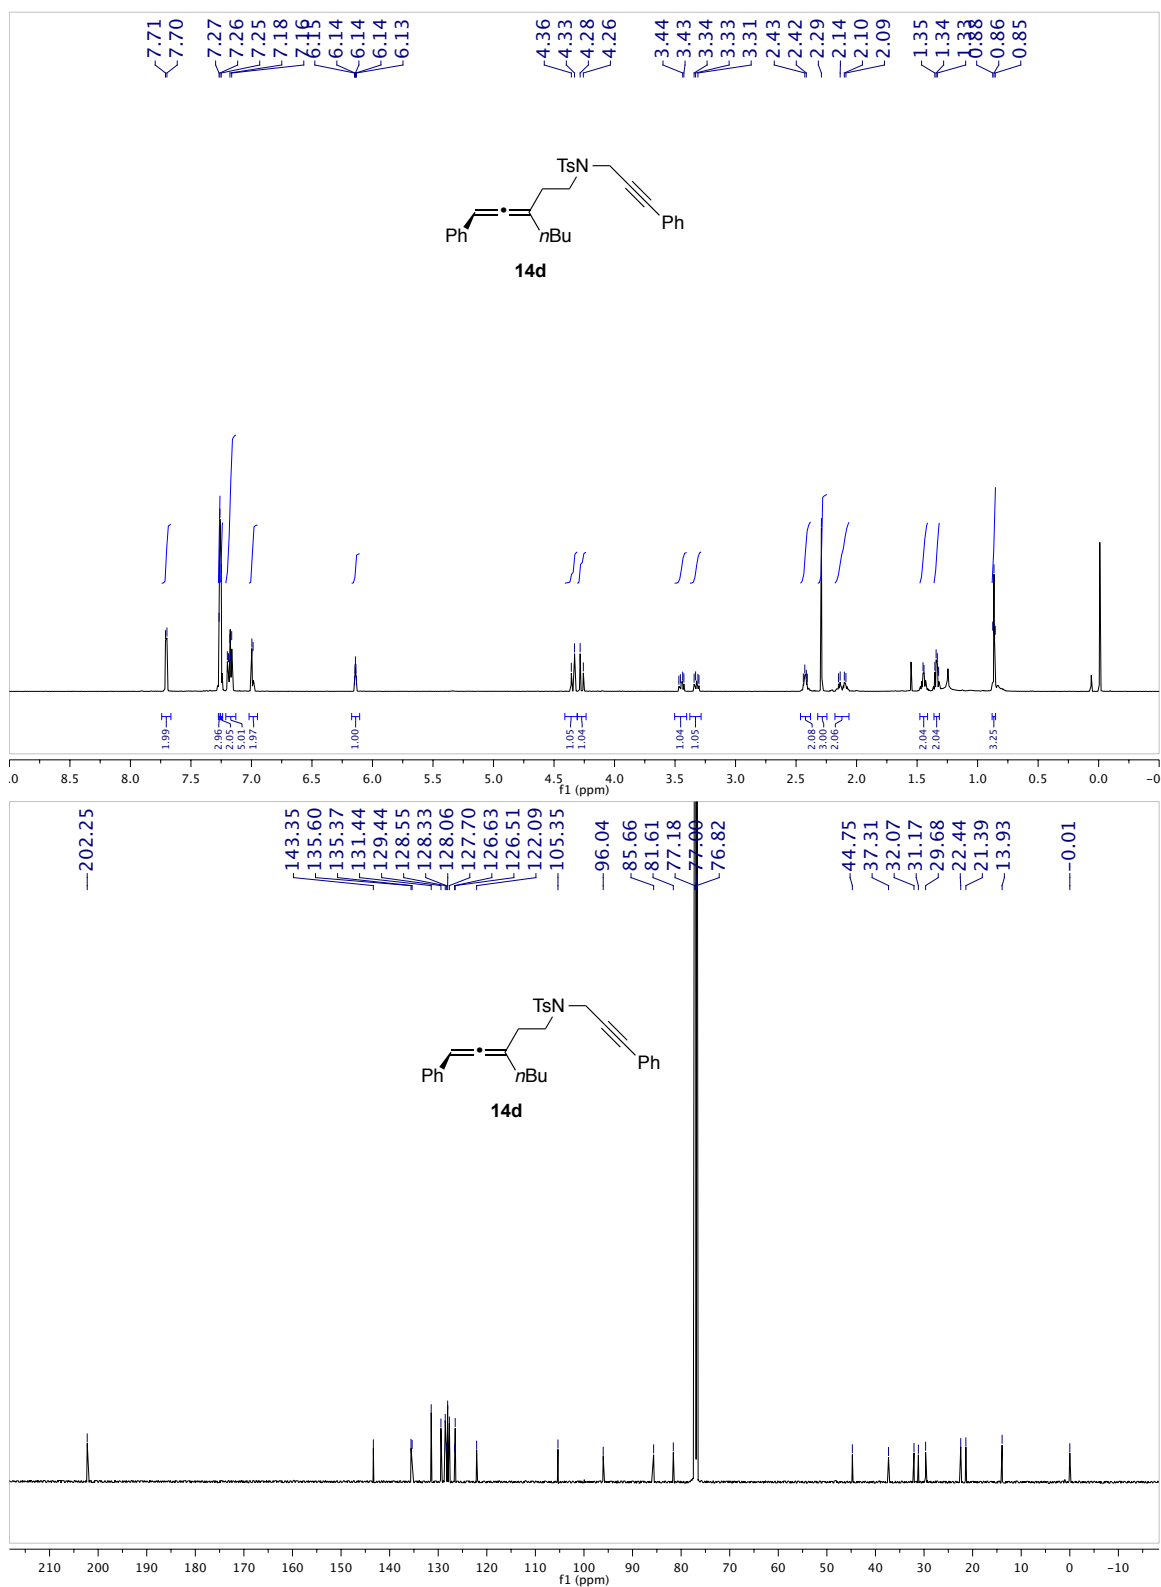

Chemical structure of **42d** is shown above the spectrum. The structure is a bicyclic compound with a phenyl group (Ph), a hydrogen atom (H), a n-butyl group (nBu), and a tosyl group (NTs).

<sup>1</sup>H NMR spectrum (CDCl<sub>3</sub>) of compound **42d**. The x-axis represents the chemical shift in ppm (δ), ranging from 0.0 to 10.0. The spectrum shows several multiplets and singlets, with integration values provided below the baseline.

Chemical shift values (ppm): 7.50, 7.48, 7.47, 7.45, 7.41, 7.38, 7.32, 7.24, 7.22, 7.21, 7.20, 6.96, 6.94, 6.93, 4.86, 4.80, 4.64, 4.58, 3.91, 3.72, 3.70, 3.65, 2.72, 2.71, 2.69, 2.68, 2.59, 2.41, 1.92, 1.88, 1.87, 1.84, 1.02, 1.00, 0.98, 0.88, 0.86, 0.86, 0.72, 0.69, 0.67.

Integration values (from left to right): 6.94, 4.80, 1.95, 1.00, 1.00, 1.02, 1.91, 0.97, 0.99, 2.75, 1.81, 2.04, 1.90, 2.73.

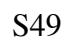

**(*R<sub>a</sub>*)-*N*-(hexa-3,4-dien-1-yl)-4-methyl-*N*-(3-phenylprop-2-yn-1-yl)benzene**

**sulfonamide (14c):**

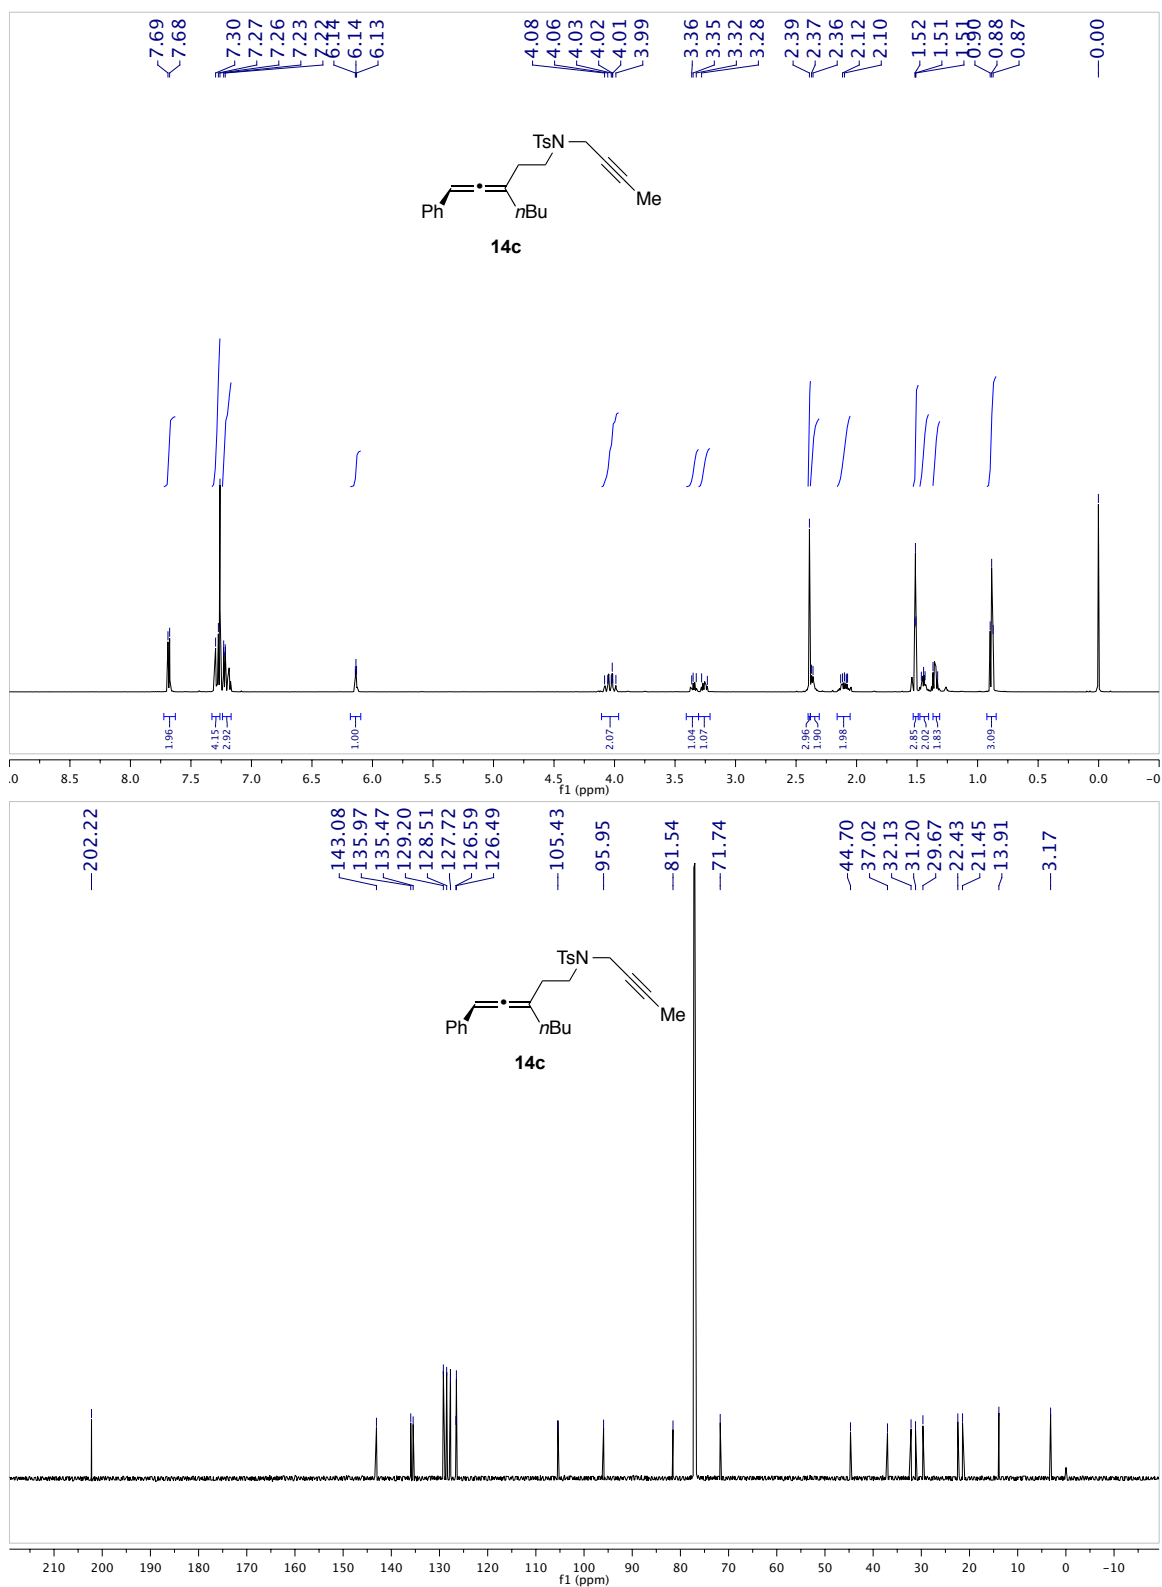

**(S)-5-butyl-8-methyl-6-phenyl-2-tosyl-1,2,3,4-tetrahydrocyclopenta[c]azepin  
-7(6H)-one (42c):**

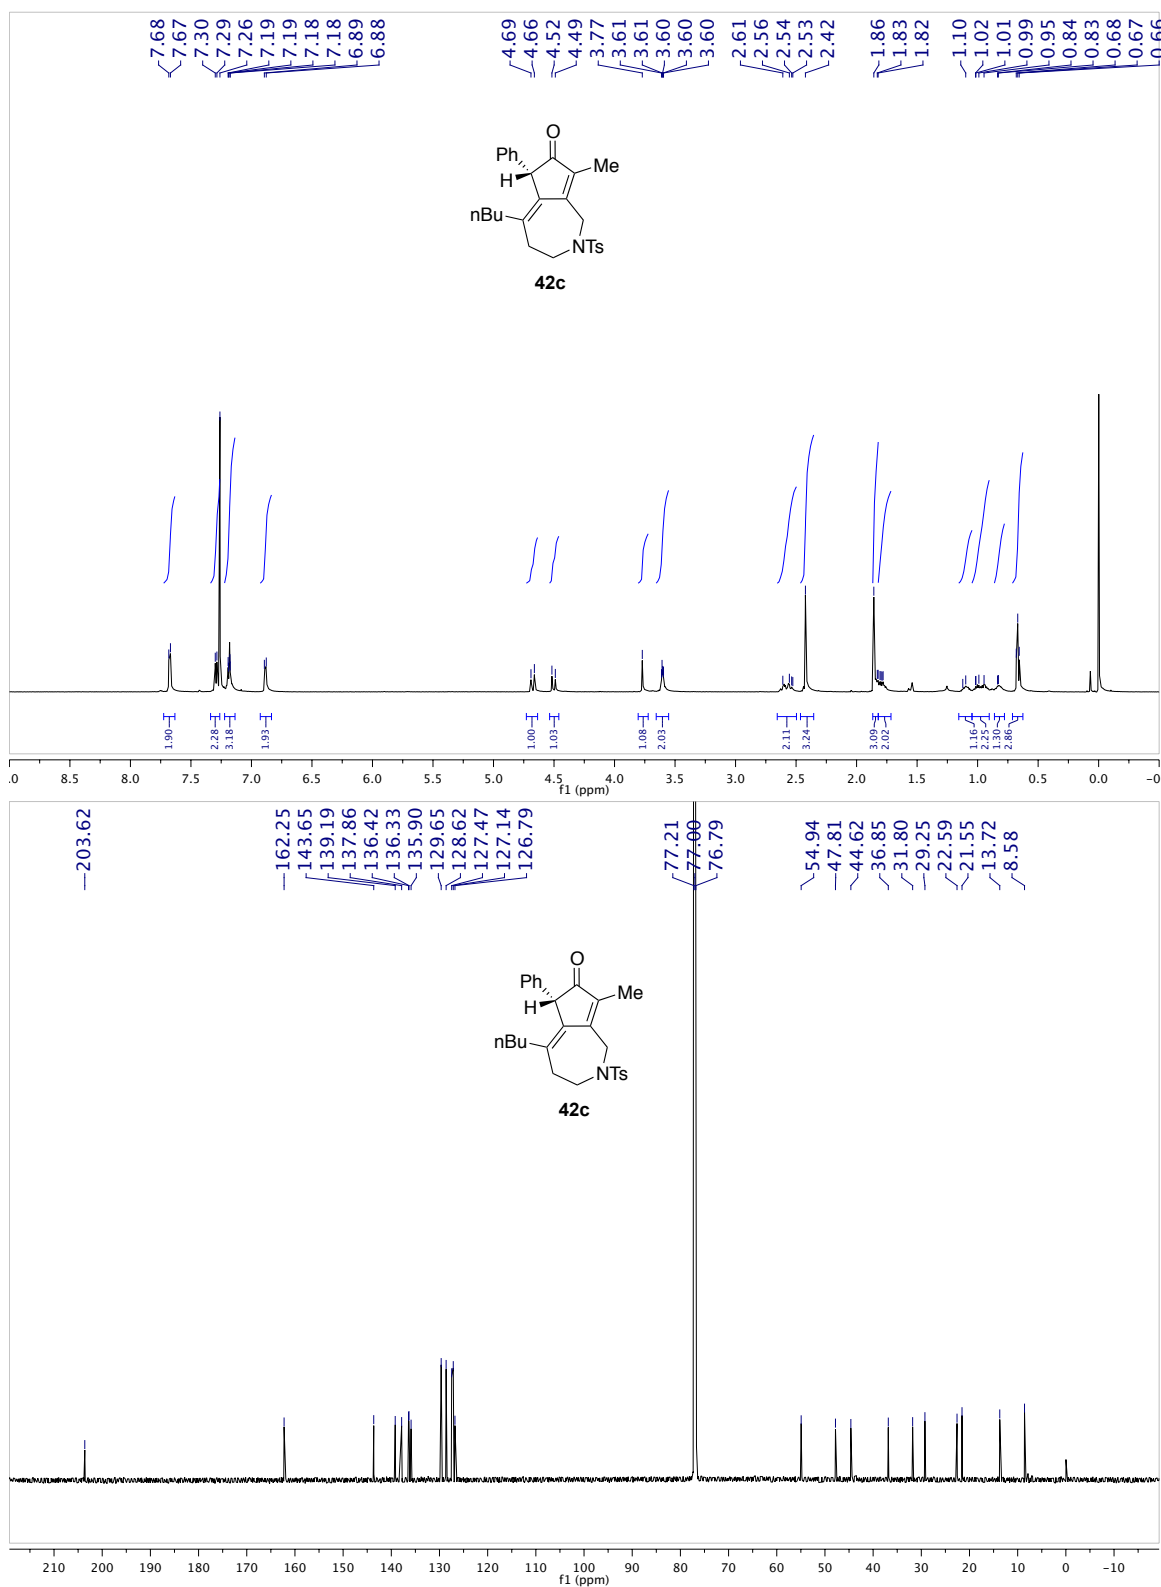

**(*R*<sub>a</sub>)-4-methyl-*N*-(3-(2-phenylvinylidene)heptyl)-*N*-(prop-2-yn-1-yl)benzene  
sulfonamide (**14e**):**

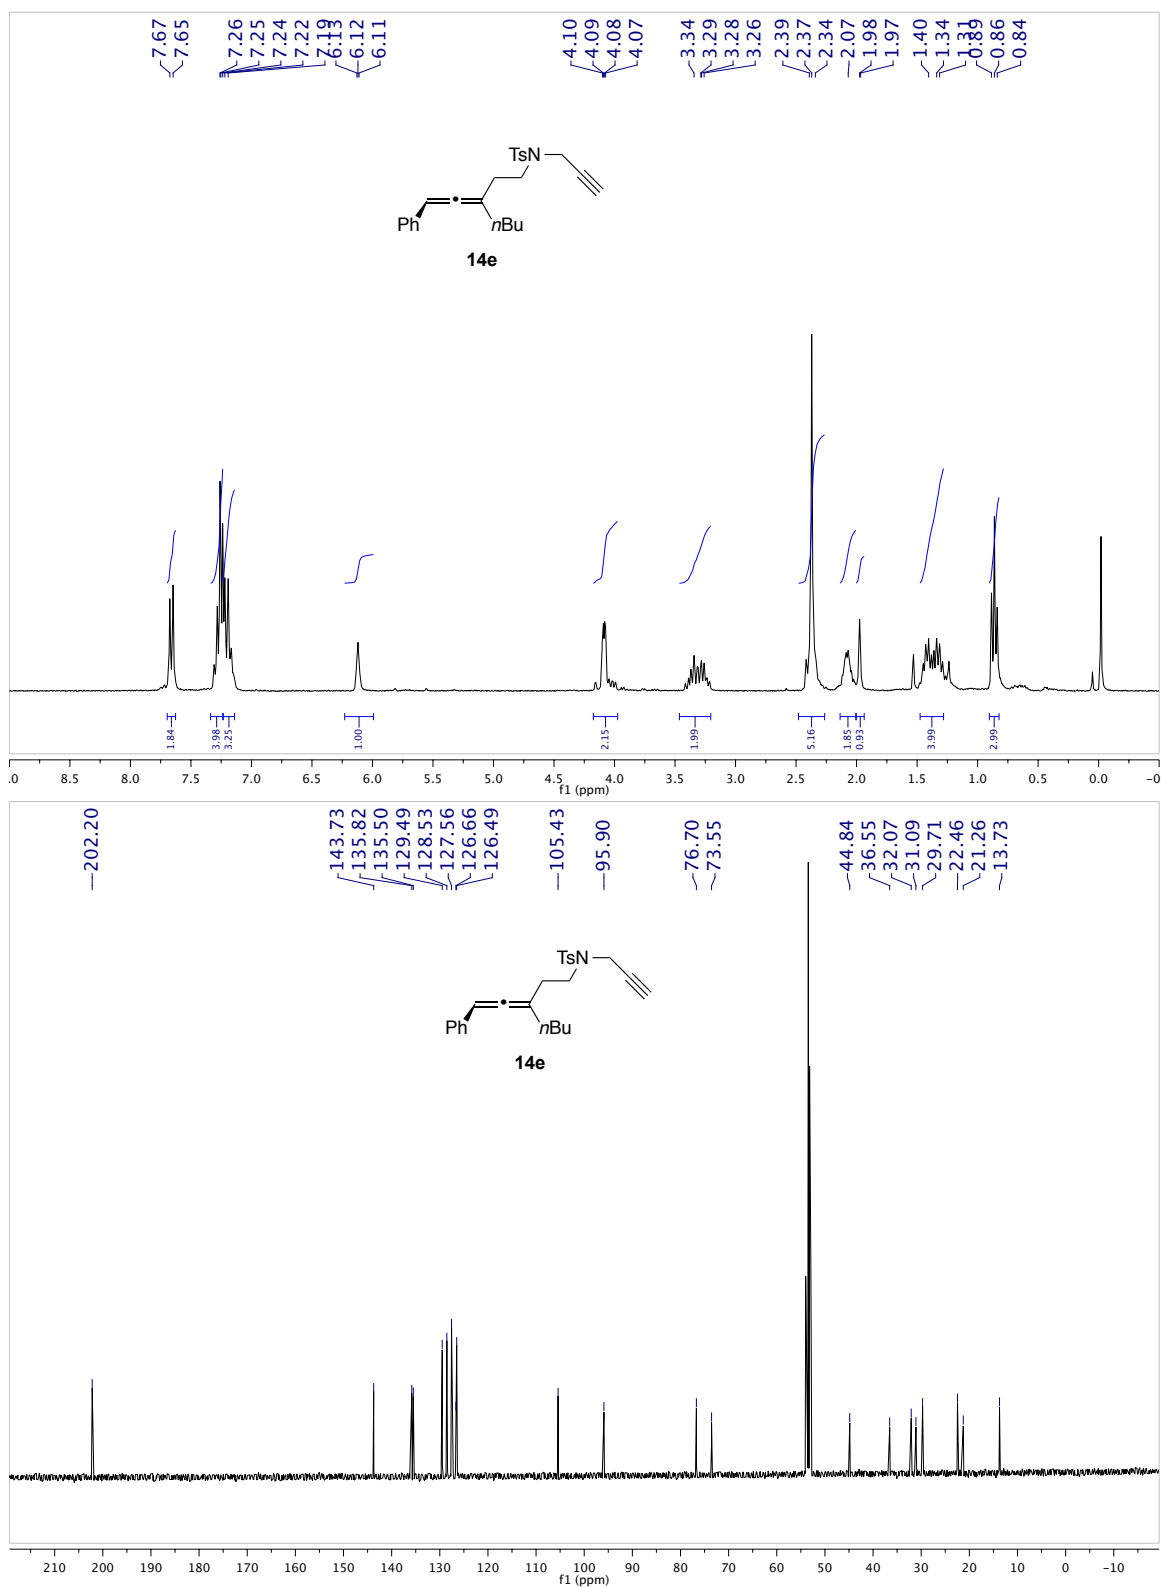



**(*R<sub>a</sub>*)-4-methyl-*N*-(3-(2-phenylvinylidene)heptyl)-*N*-(3-(trimethylsilyl)prop-2-yn-1-yl)benzenesulfonamide(**14f**):**

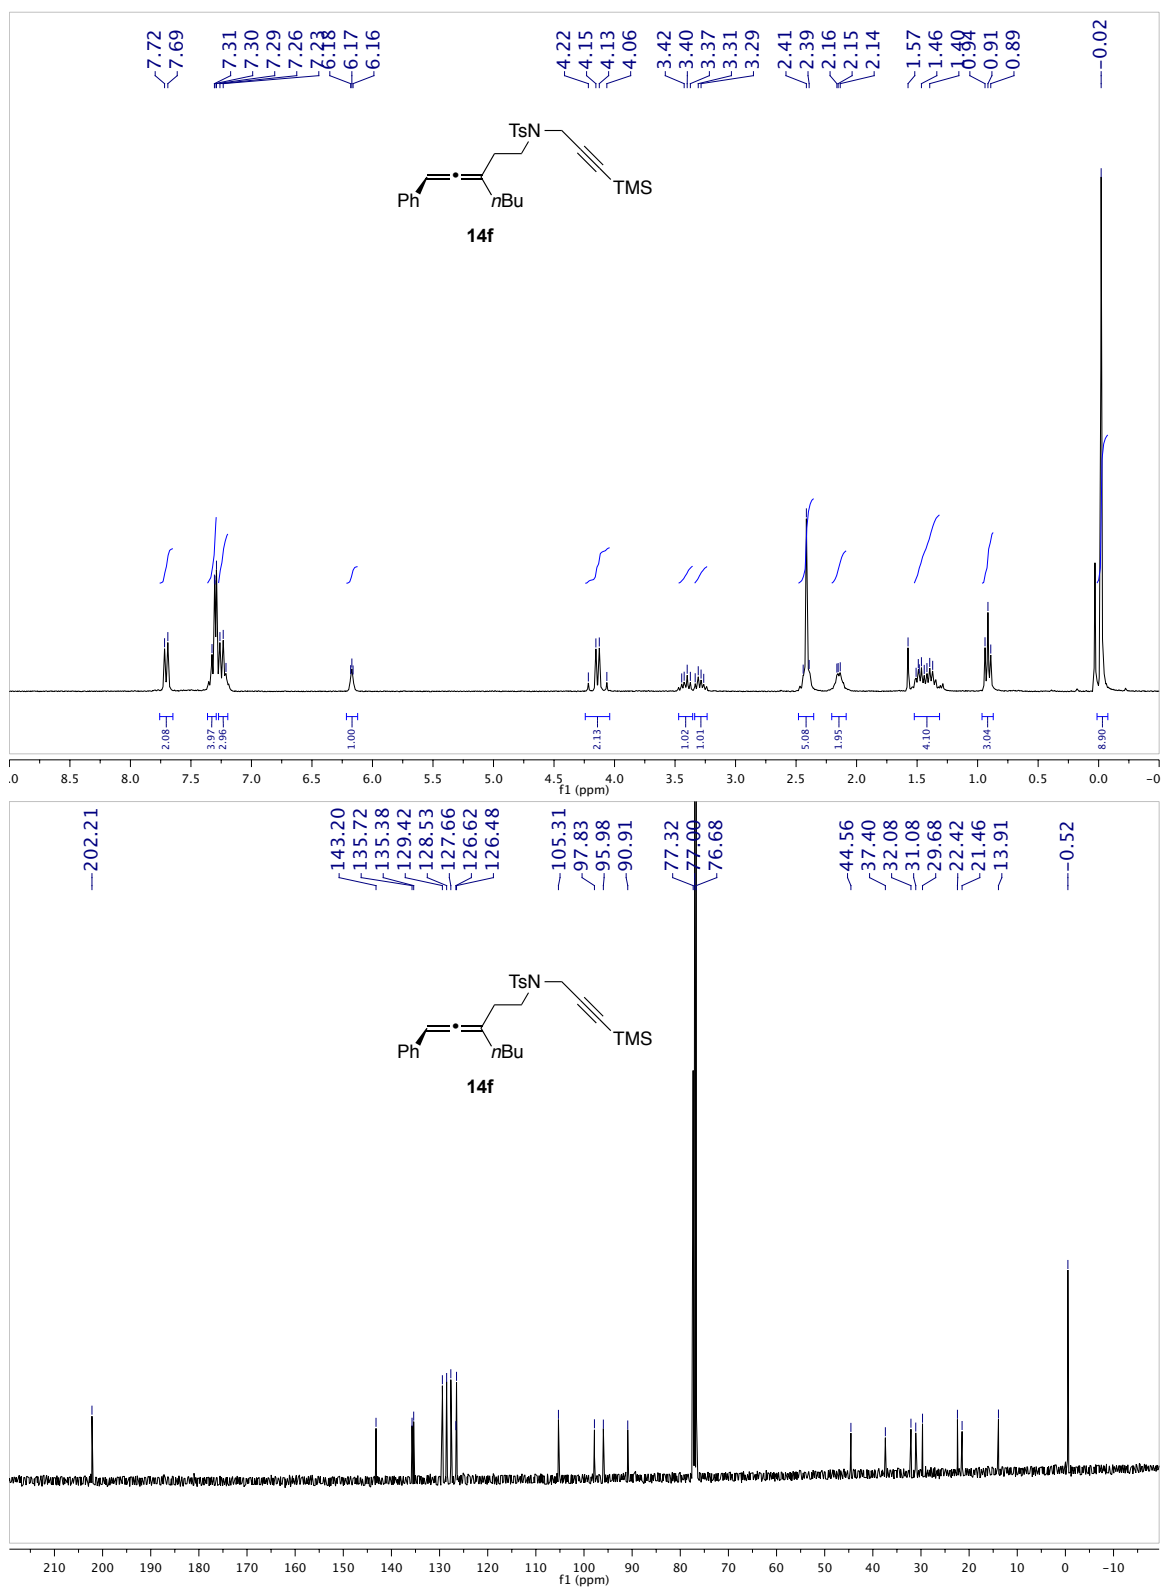

**[c]azepin-7(6*H*)-one (42f):**

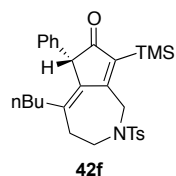

**(*R*<sub>a</sub>)-3-(2-phenylvinylidene)heptyl methanesulfonate (33):**

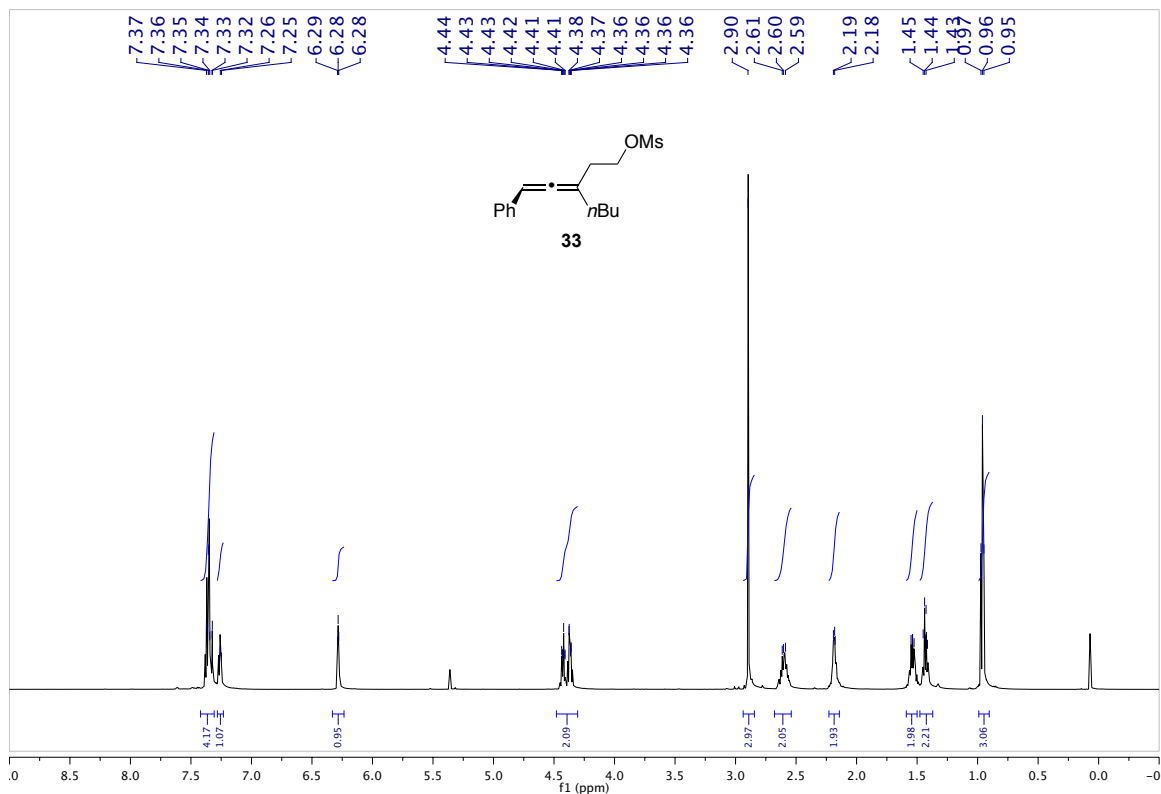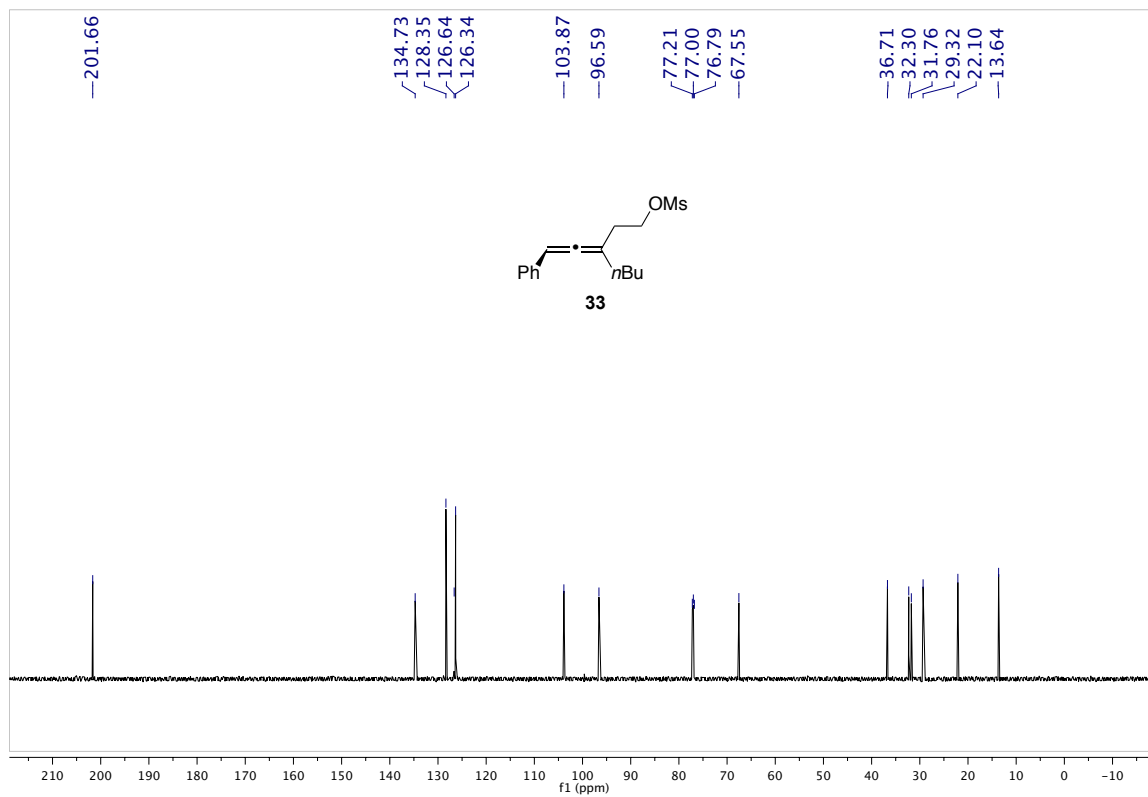

**(*R*<sub>a</sub>)-diethyl 2-(3-phenylprop-2-yn-1-yl)-2-(3-(2-phenylvinylidene)heptyl)**

**malonate (16d):**

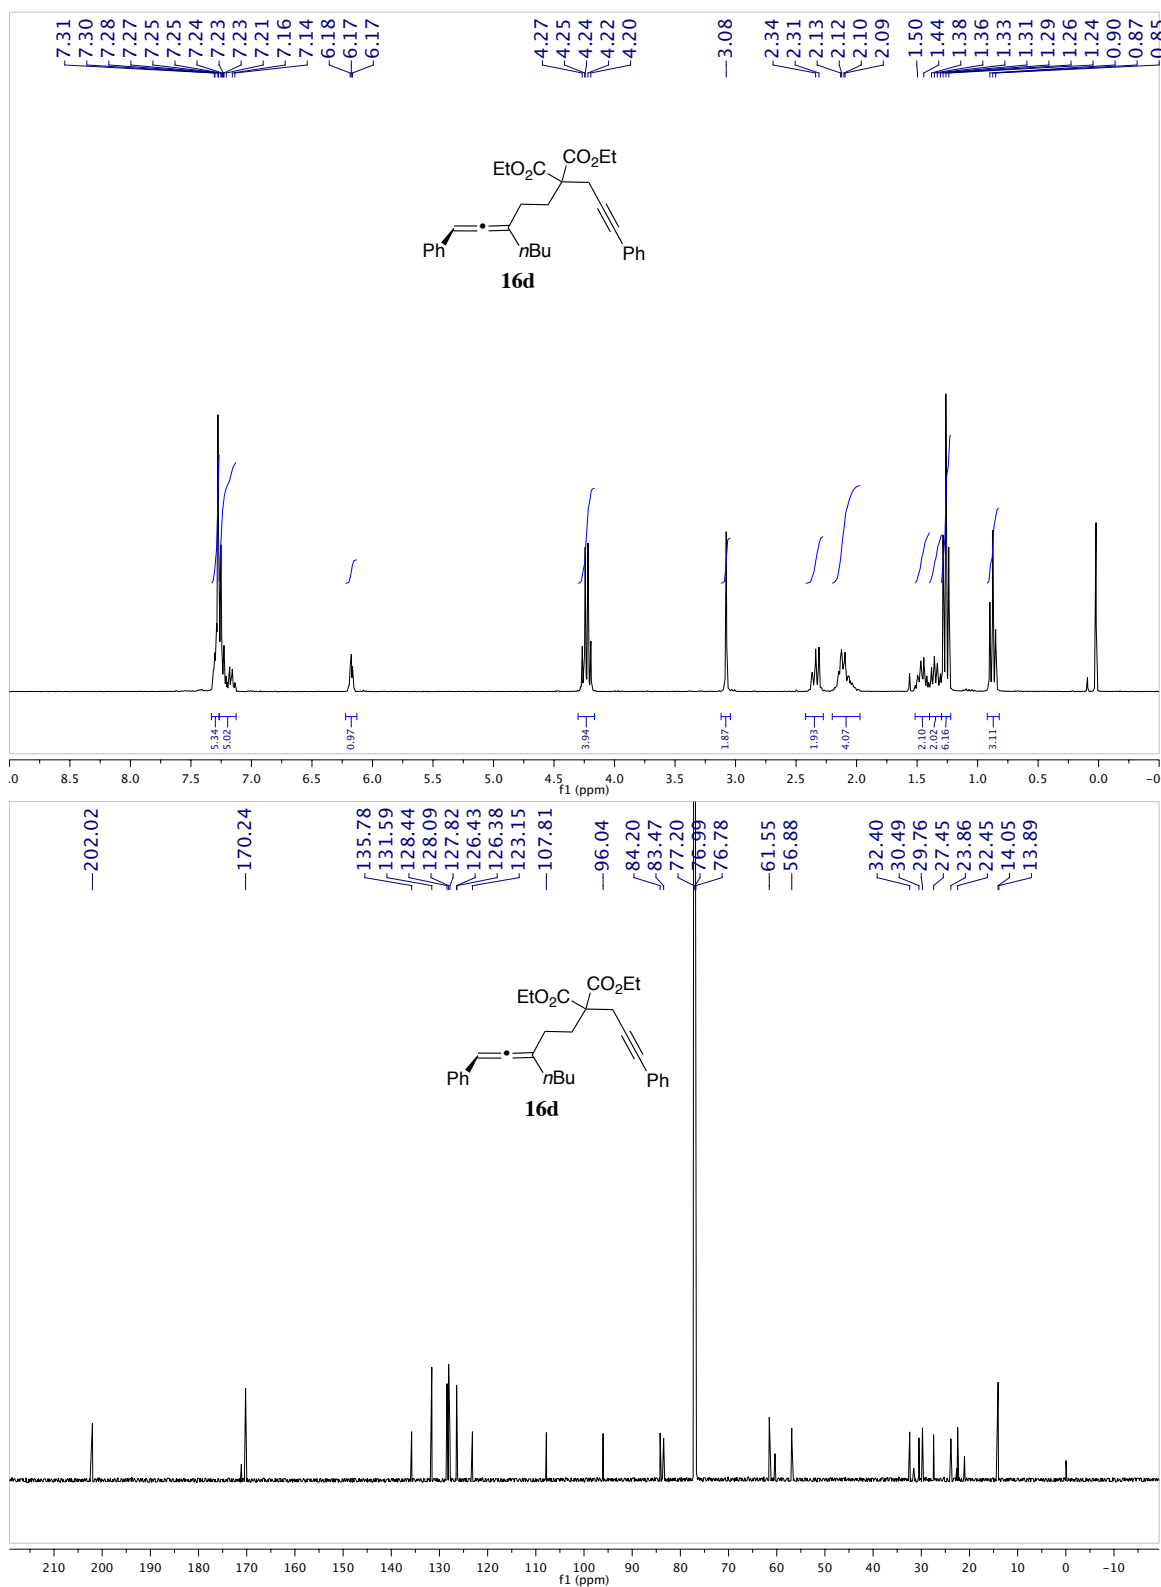

**(S)-diethyl 8-butyl-2-oxo-1,3-diphenyl-1,2,6,7-tetrahydroazulene-5,5(4*H*)-dicarboxylate (44d):**

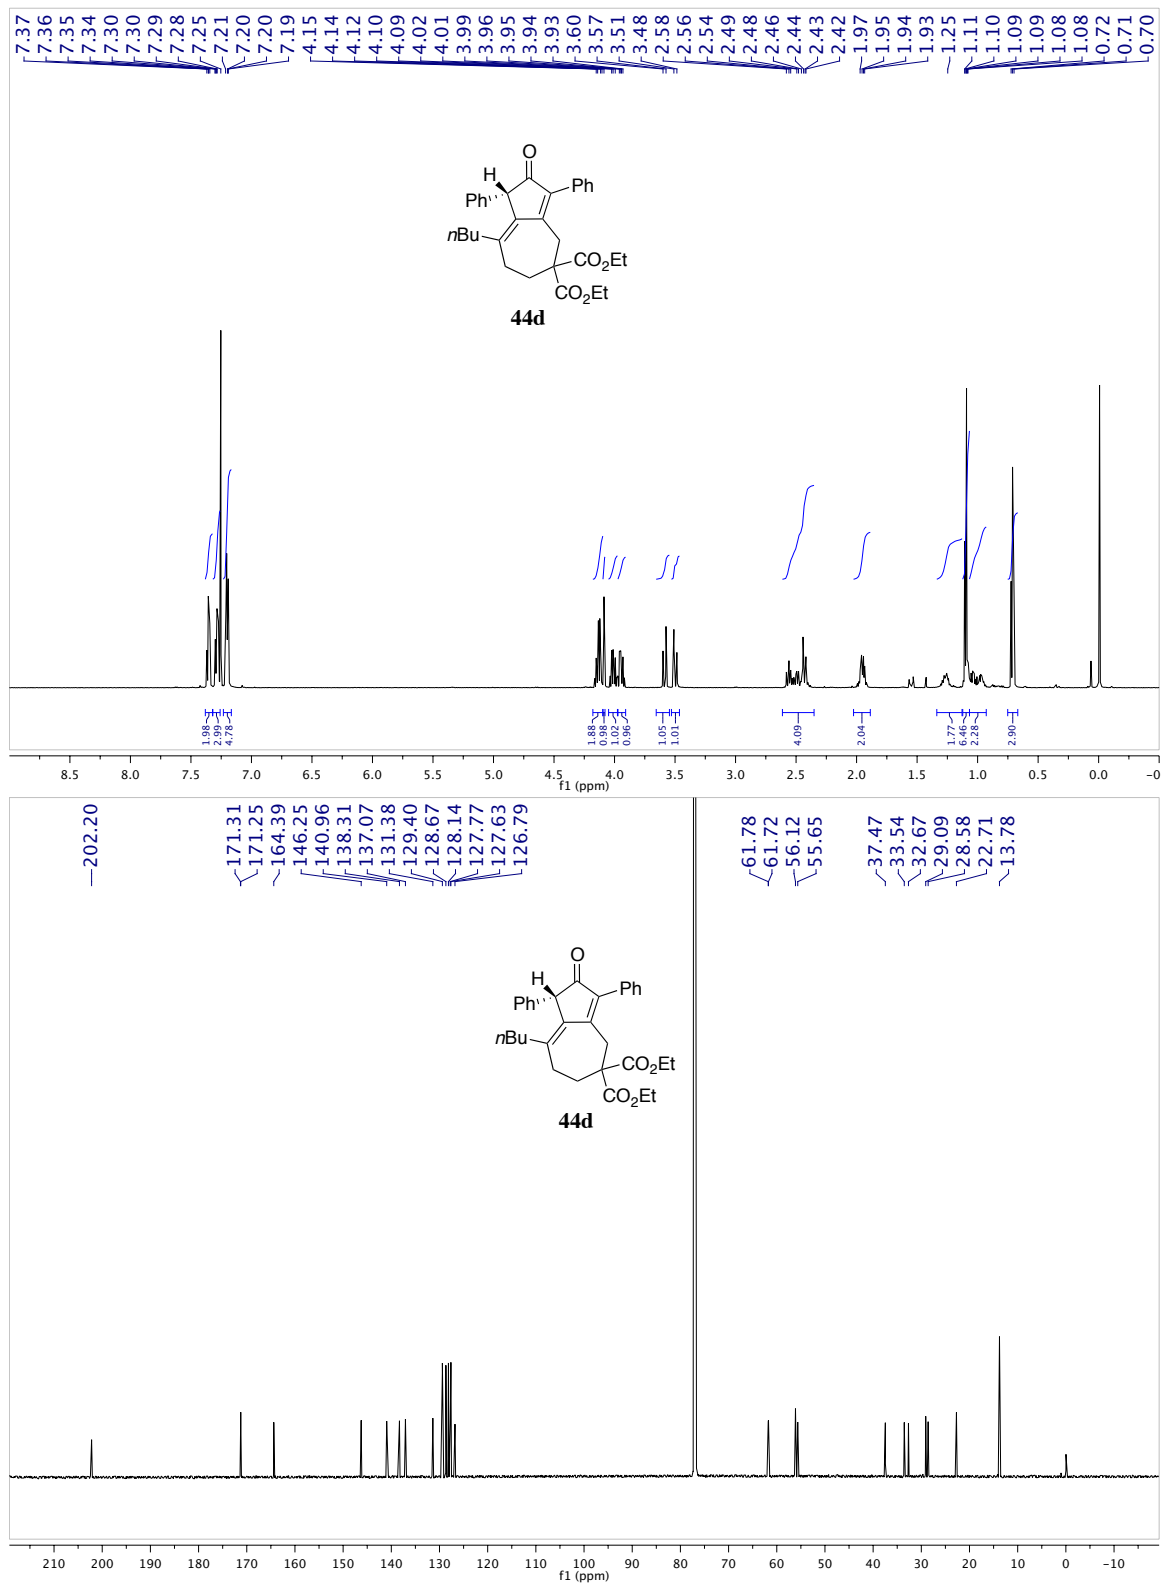

**(*R<sub>a</sub>*)-diethyl 2-(3-(2-phenylvinylidene)heptyl)-2-(prop-2-yn-1-yl)malonate**

**(16e):**

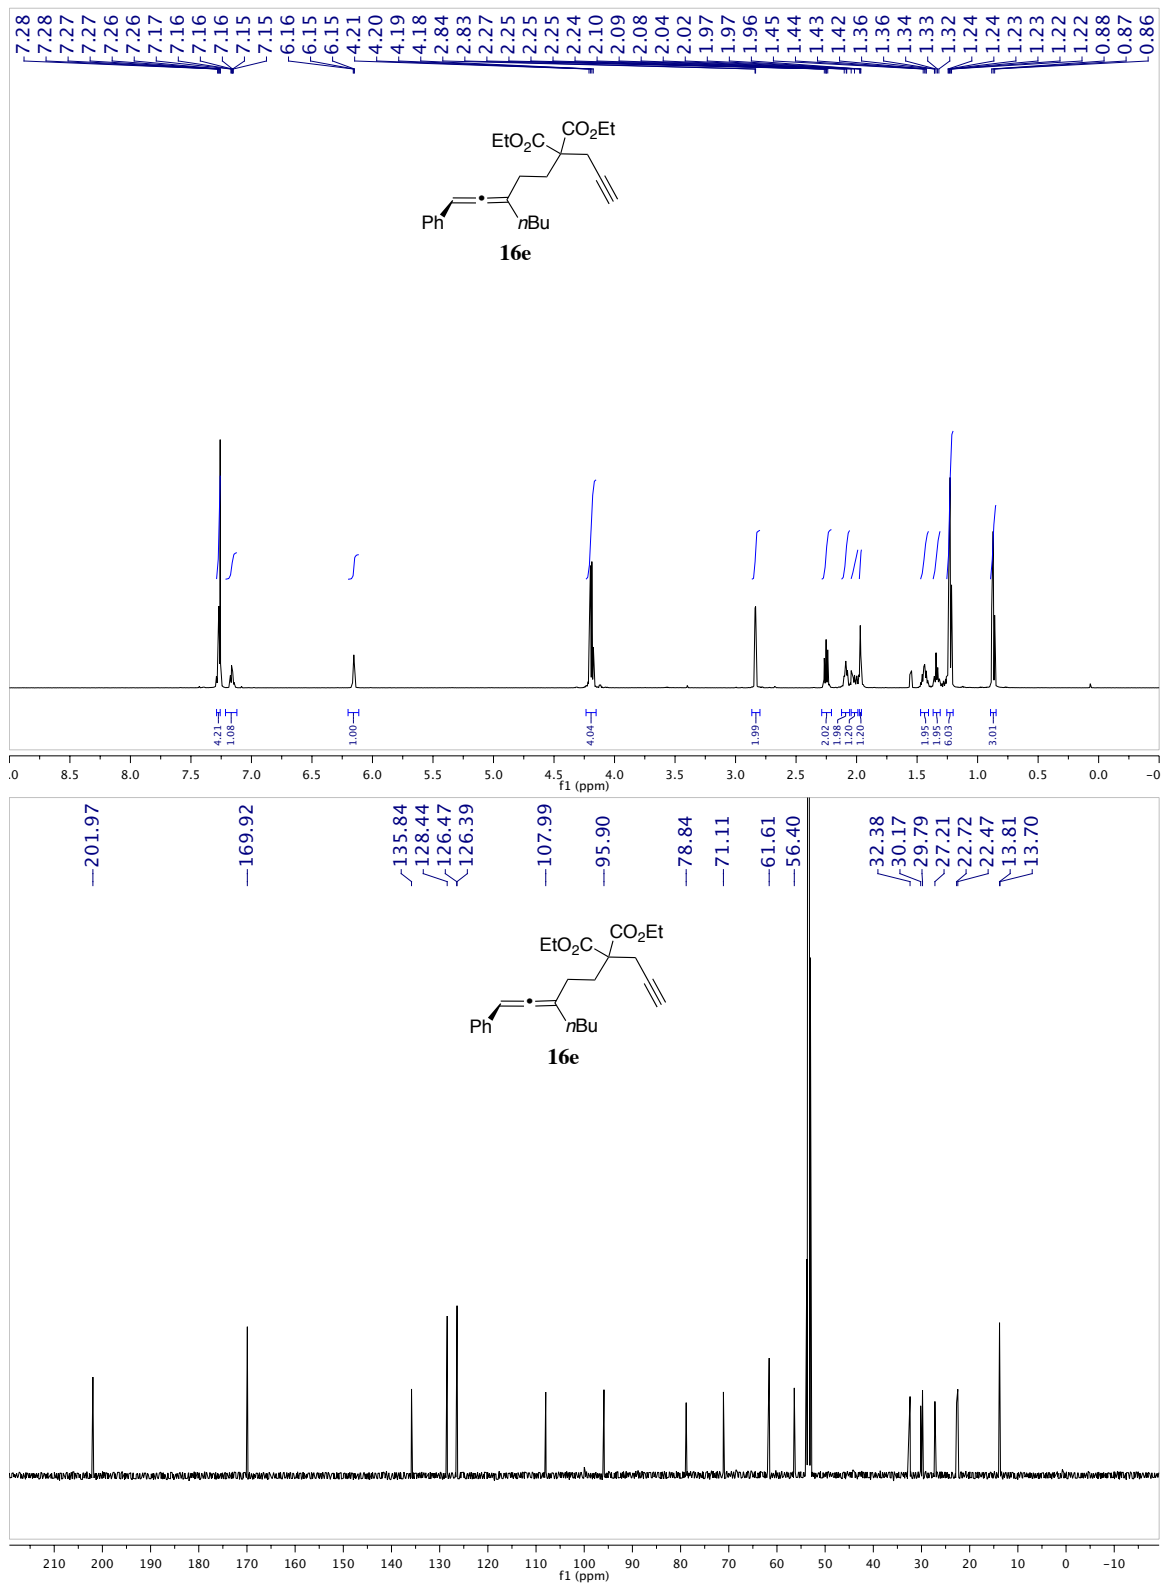

**(*R*<sub>a</sub>)-diethyl 2-(3-(2-phenylvinylidene)heptyl)-2-(3-(trimethylsilyl)prop-2-yn-1-yl)malonate (16f):**

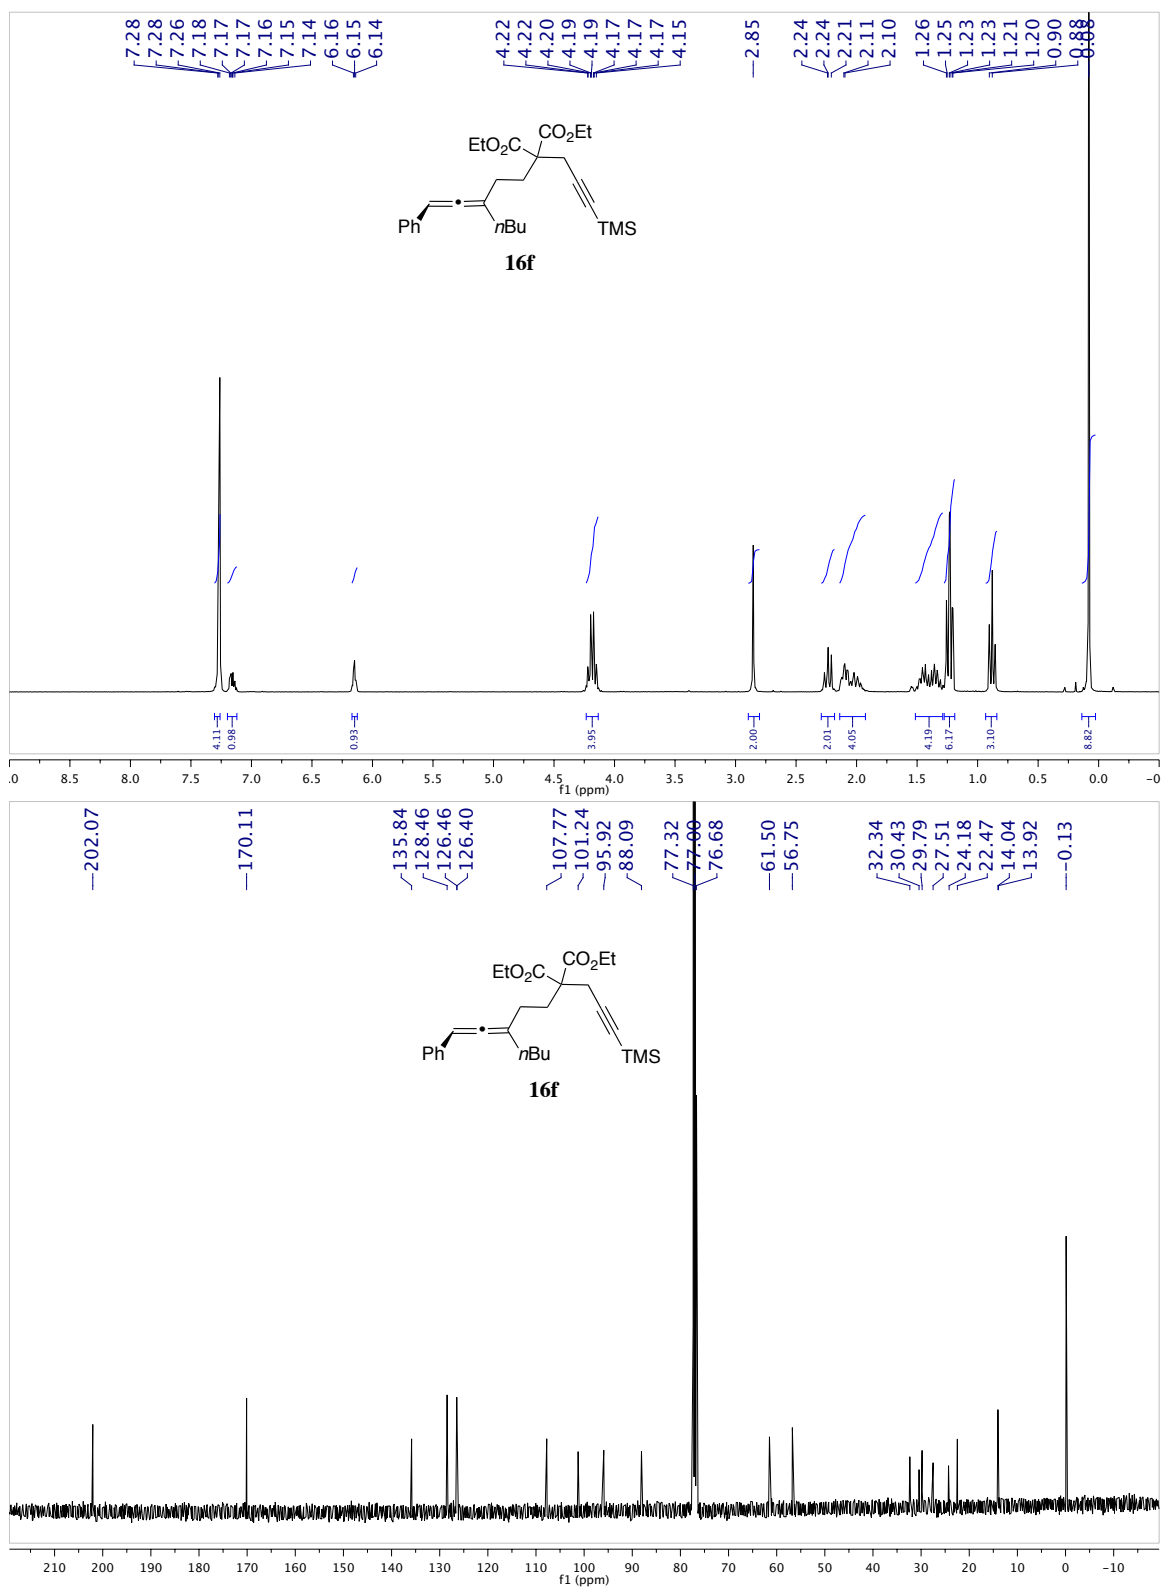

**(S)-diethyl 8-butyl-2-oxo-1-phenyl-3-(trimethylsilyl)-1,2,6,7-tetrahydro  
azulene-5,5(4H)-dicarboxylate (44f):**

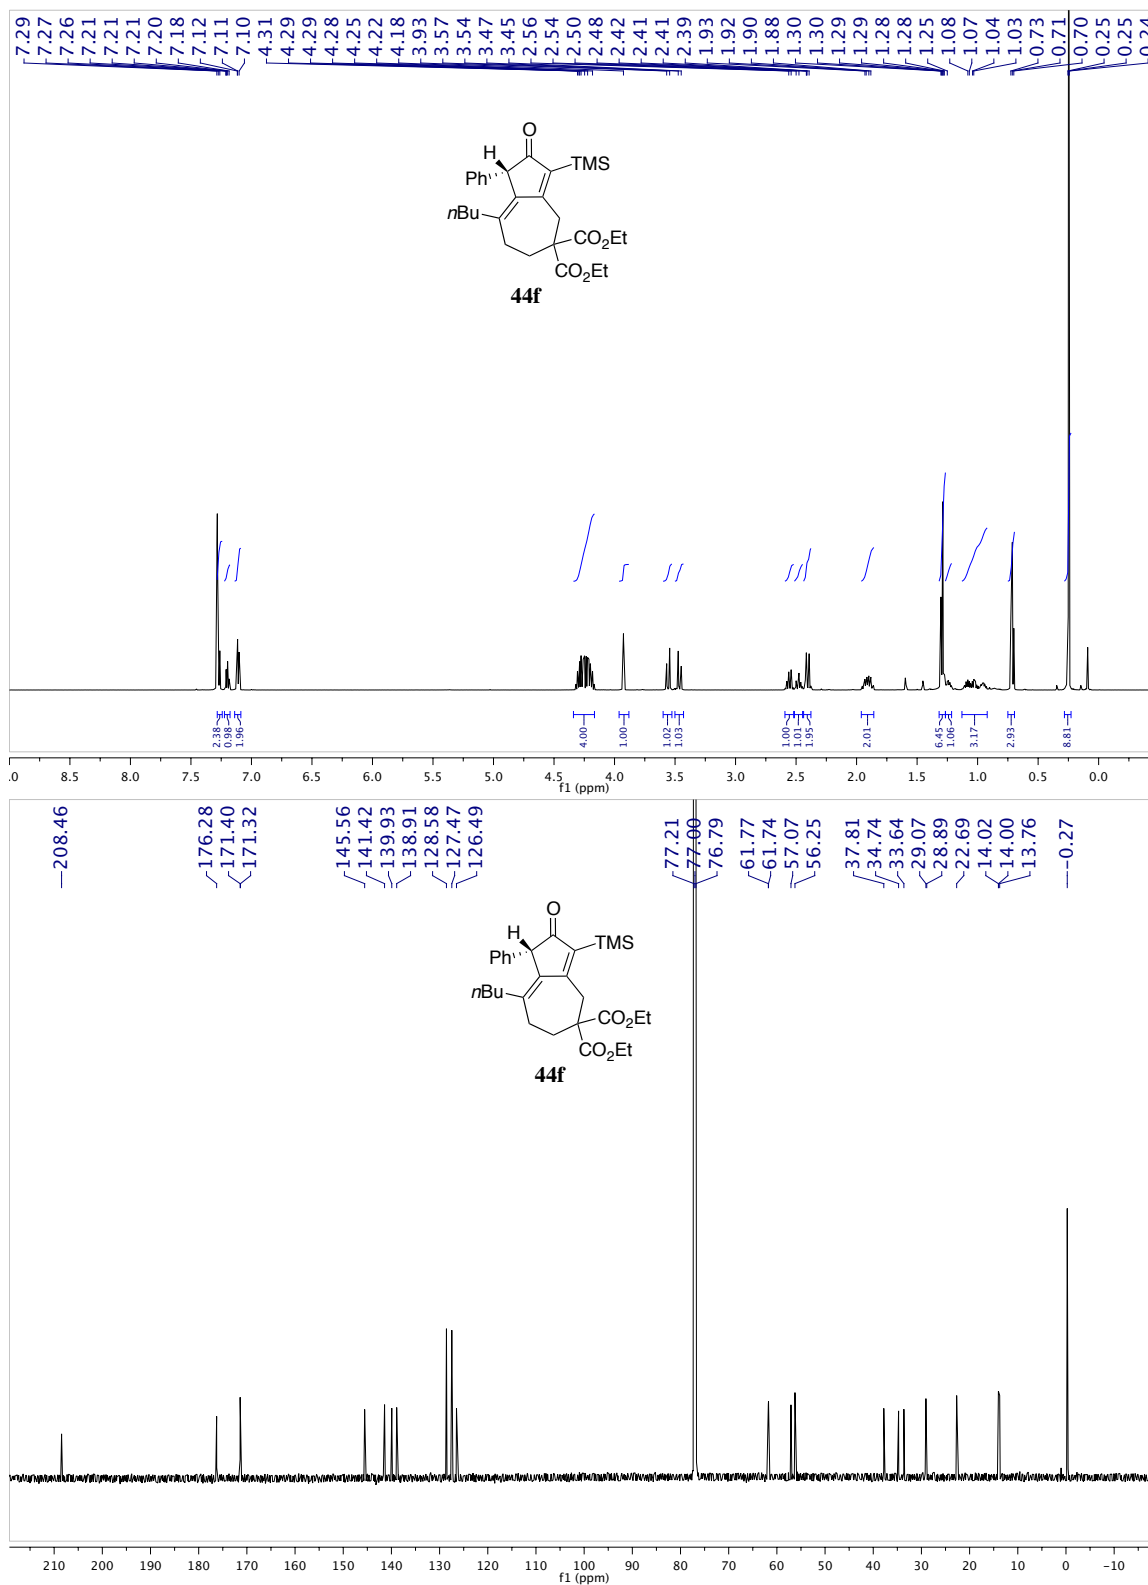



**(*R*<sub>a</sub>)-diethyl 2-(but-2-yn-1-yl)-2-(3-(2-phenylvinylidene)heptyl)malonate (16c):**

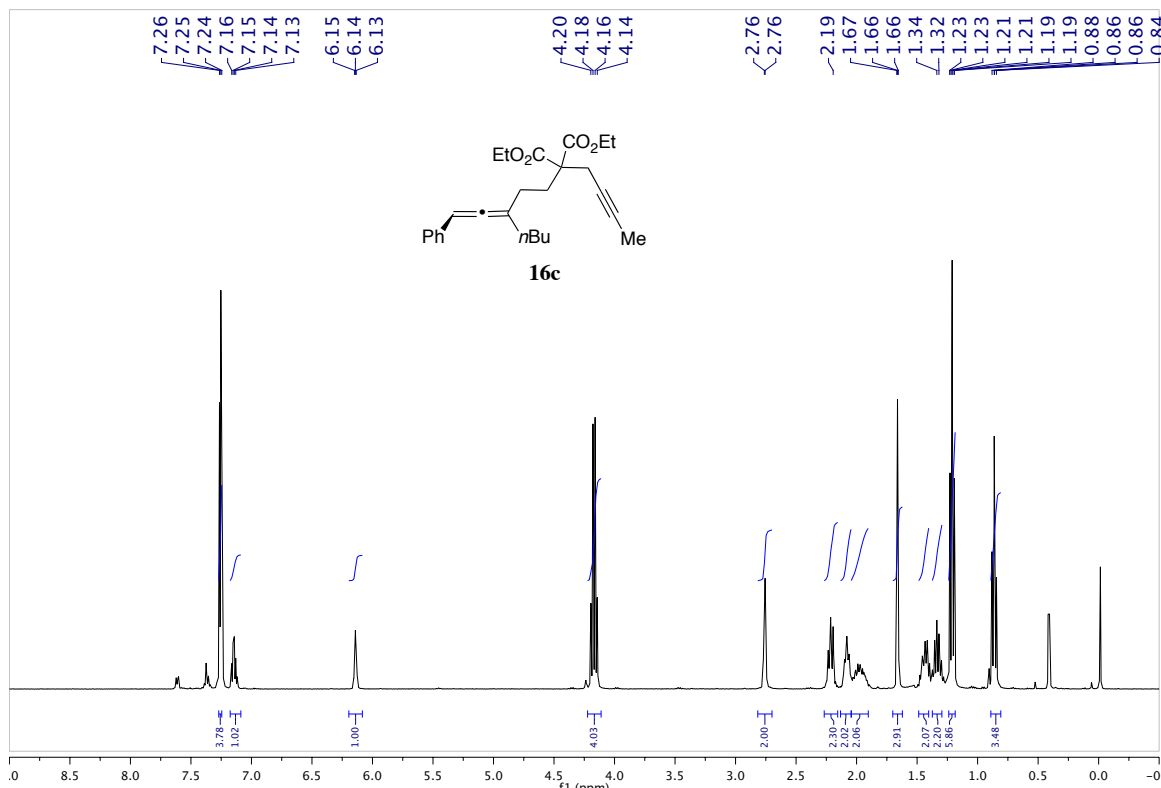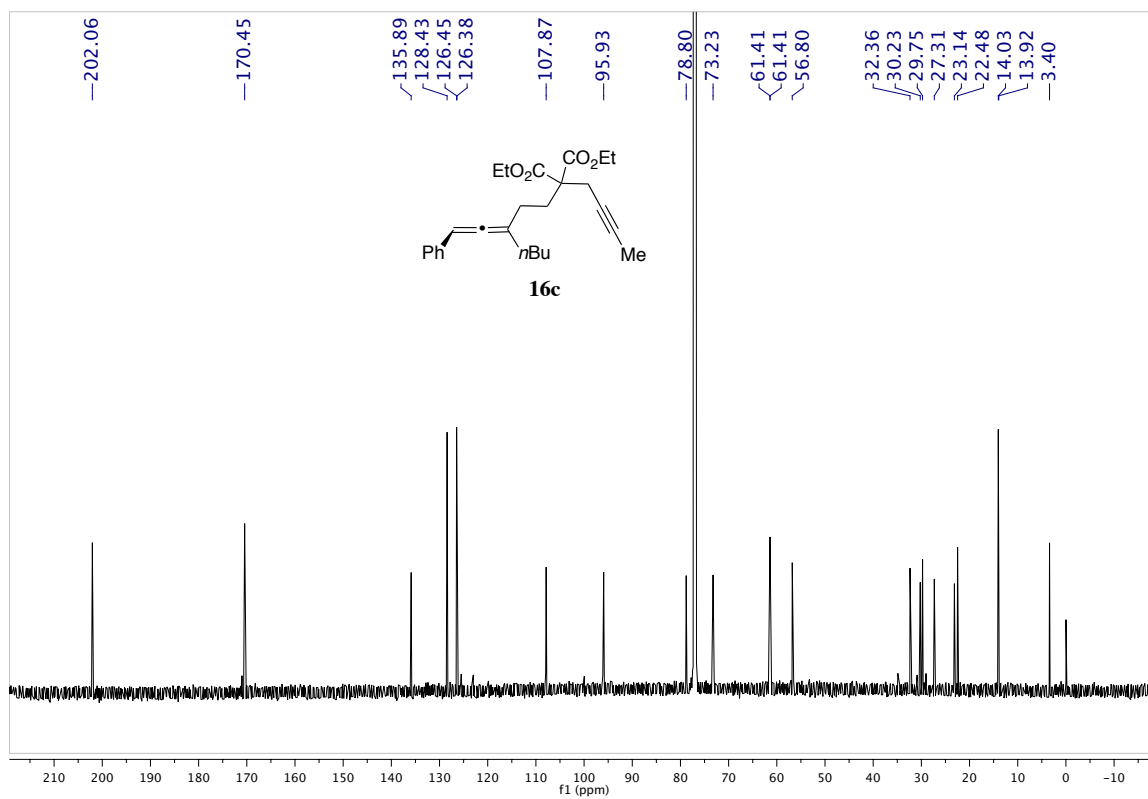

**(S)-diethyl 8-butyl-3-methyl-2-oxo-1-phenyl-1,2,6,7-tetrahydroazulene-5,5**

**(4*H*)-dicarboxylate (44c):**

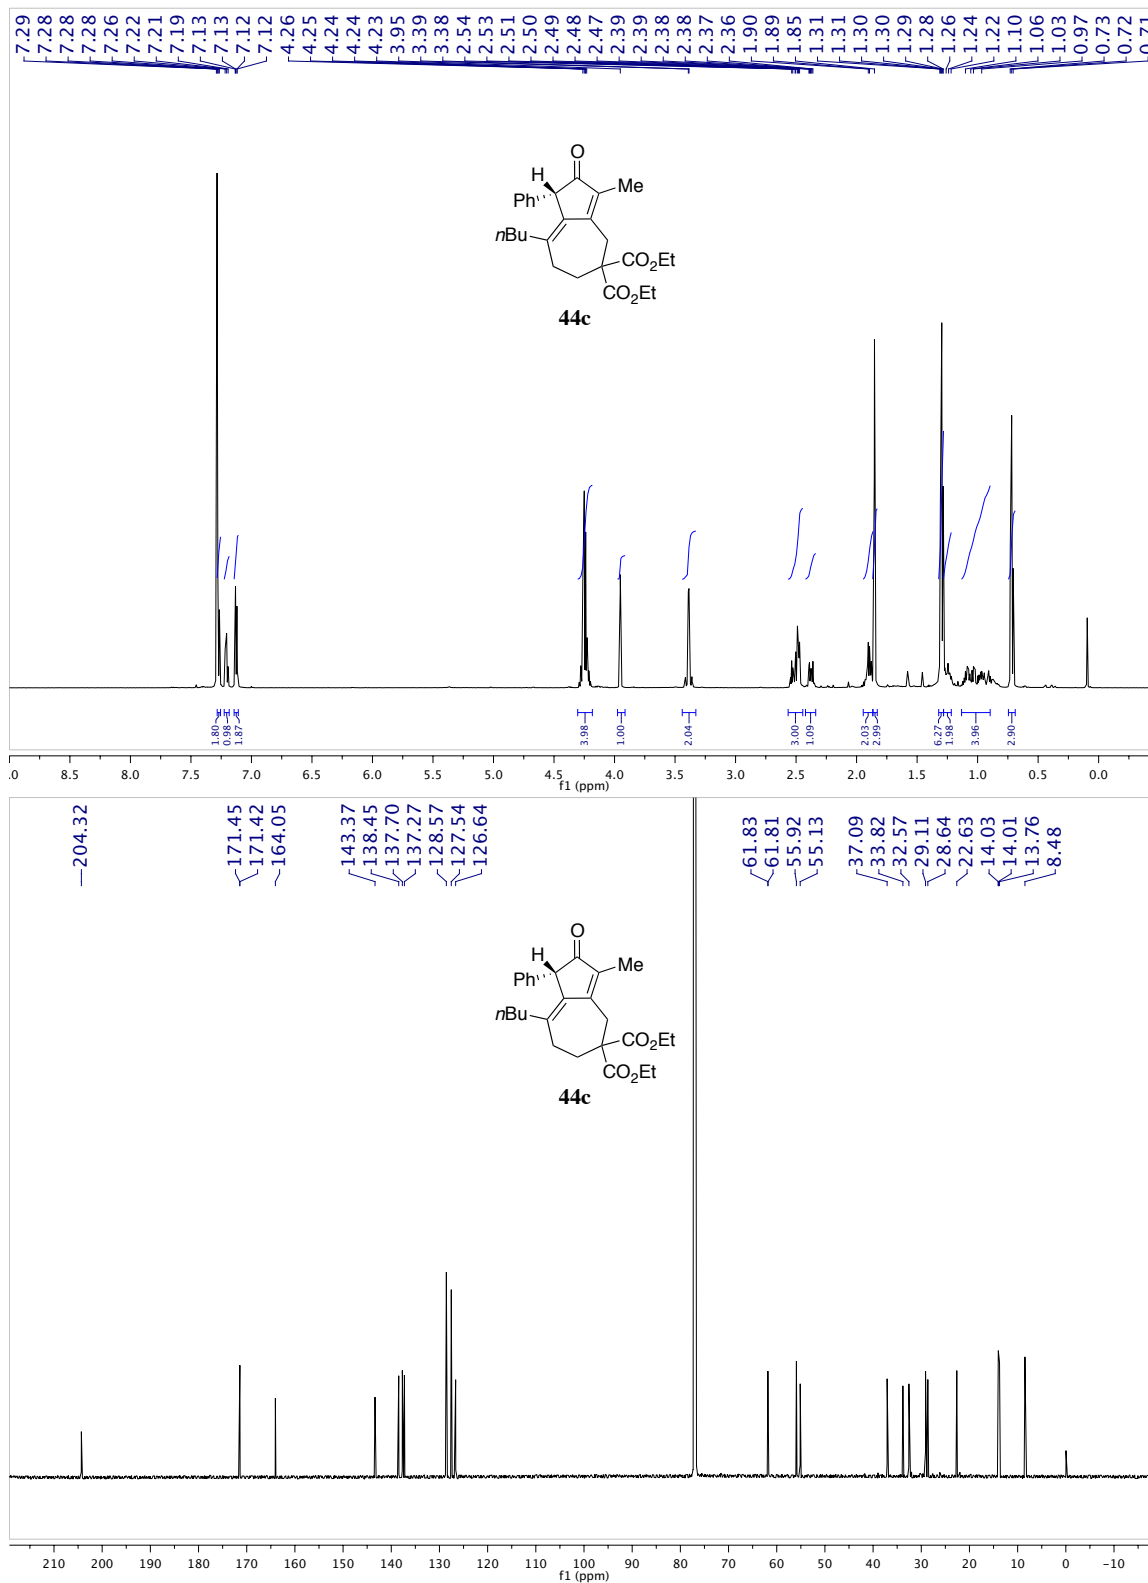

**(*R*<sub>a</sub>)-(3-(2-((3-phenylprop-2-yn-1-yl)oxy)ethyl)hepta-1,2-dien-1-yl)benzene**

**(15d):**

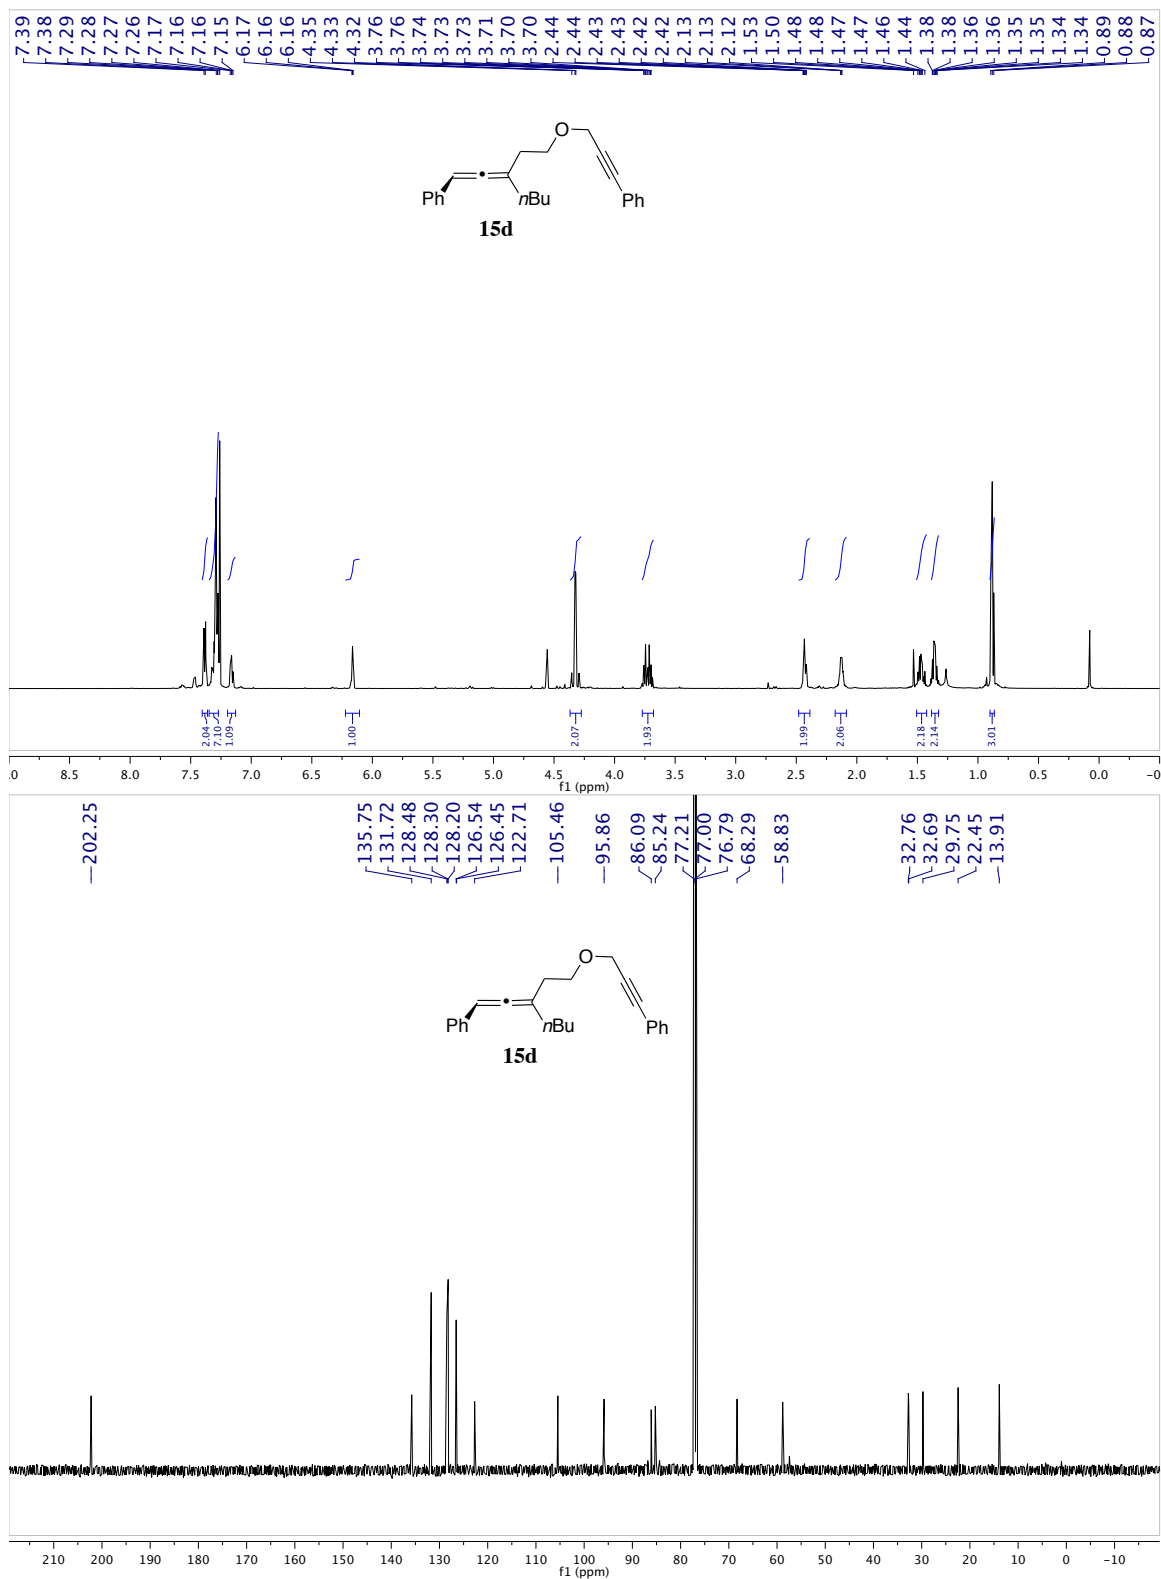

**(S)-5-butyl-6,8-diphenyl-3,4-dihydro-1*H*-cyclopenta[*c*]oxepin-7(6*H*)-one**

**(43d):**

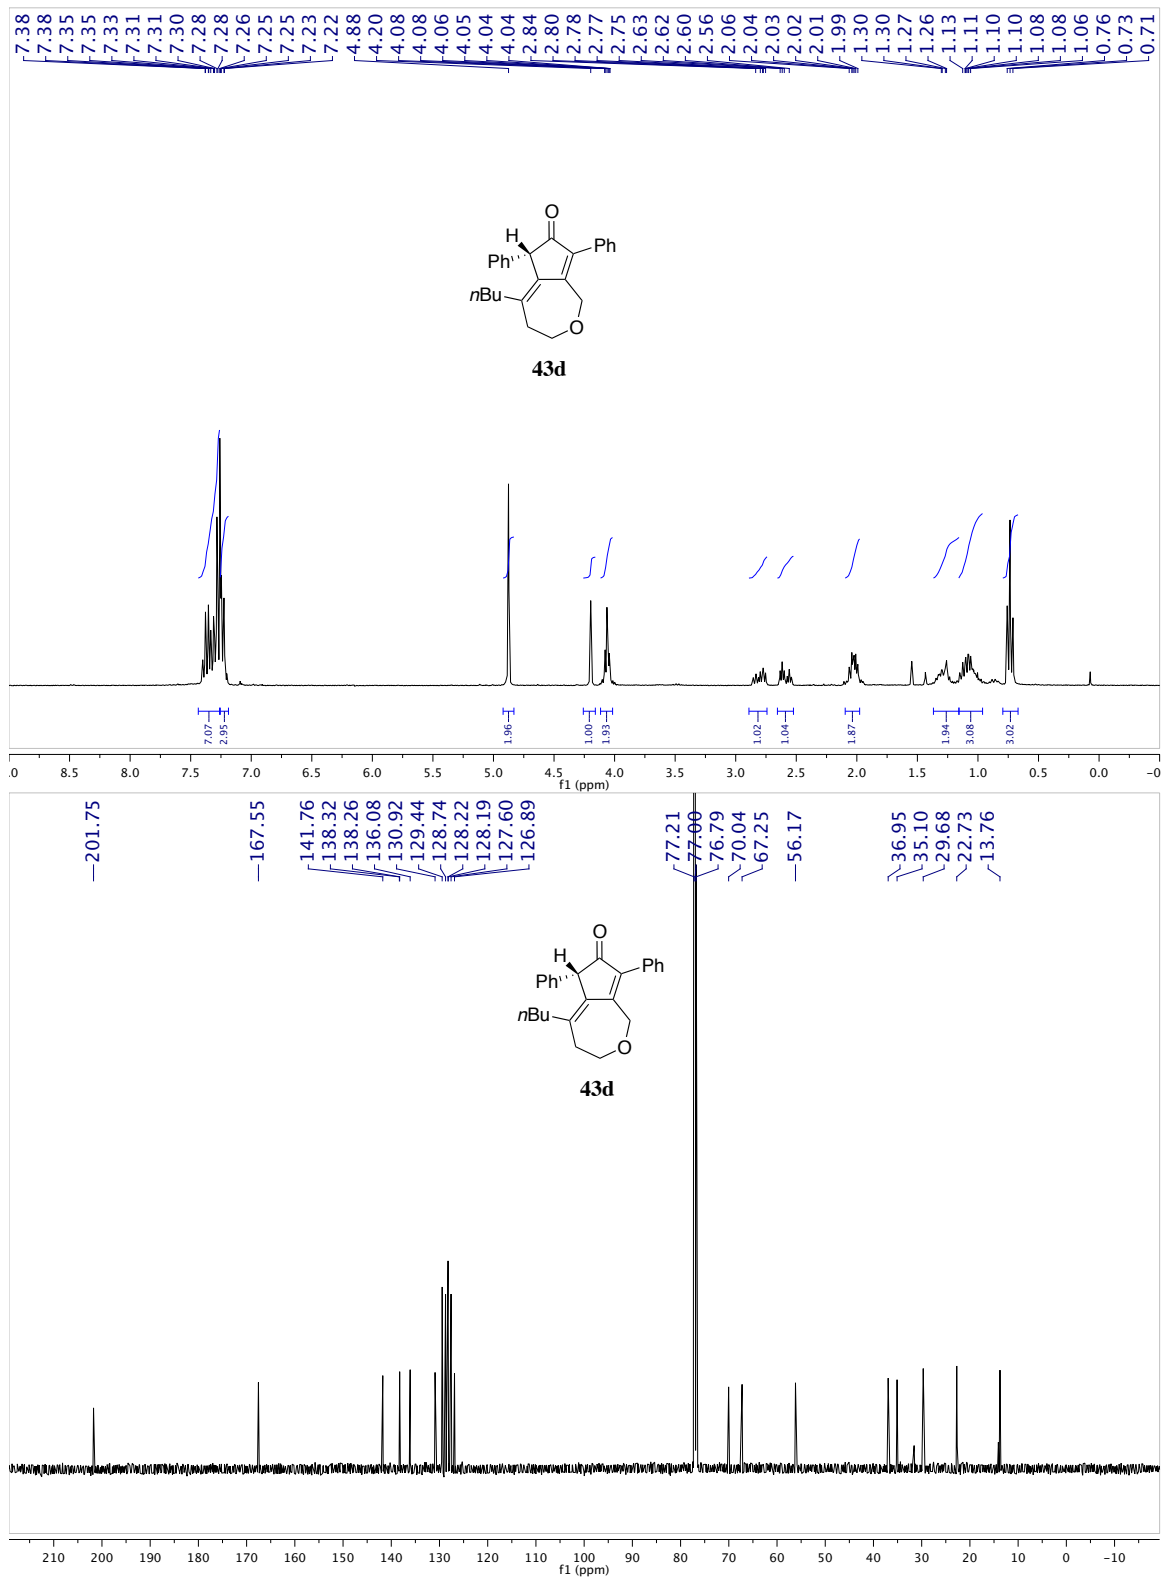

**(*R*<sub>a</sub>)-(3-(2-(but-2-yn-1-yloxy)ethyl)hepta-1,2-dien-1-yl)benzene (15c):**

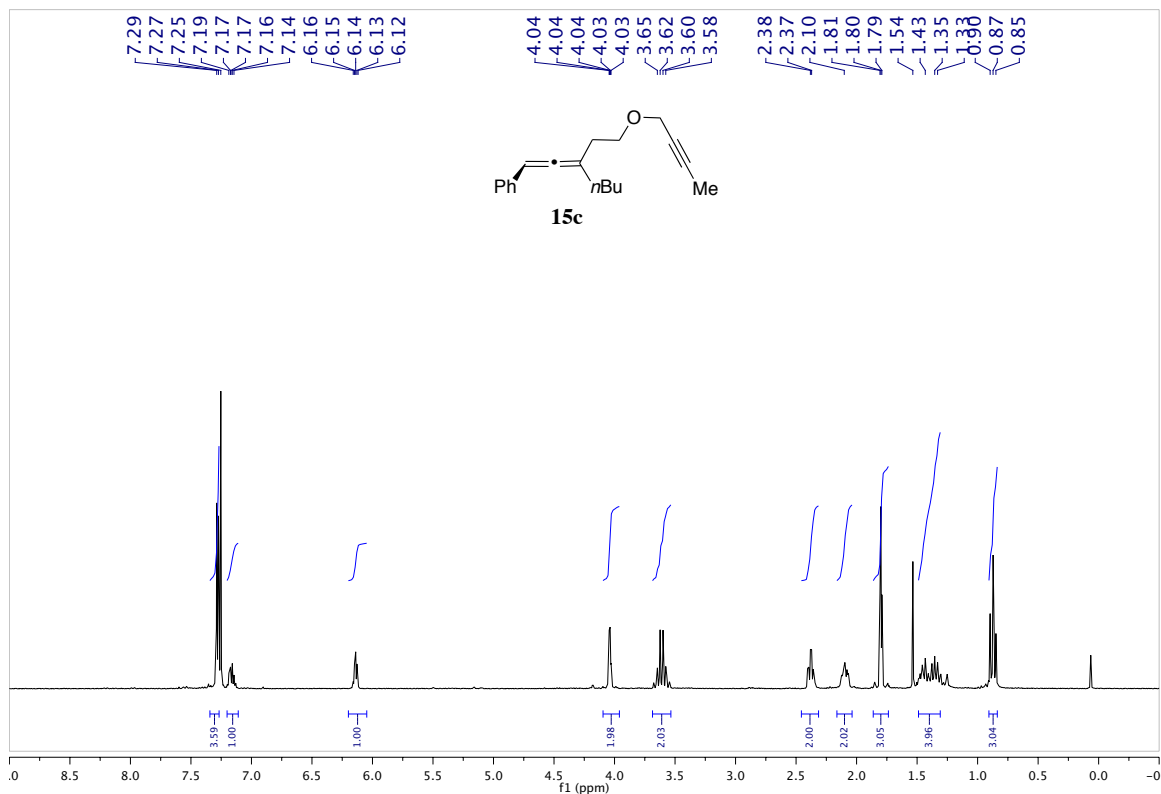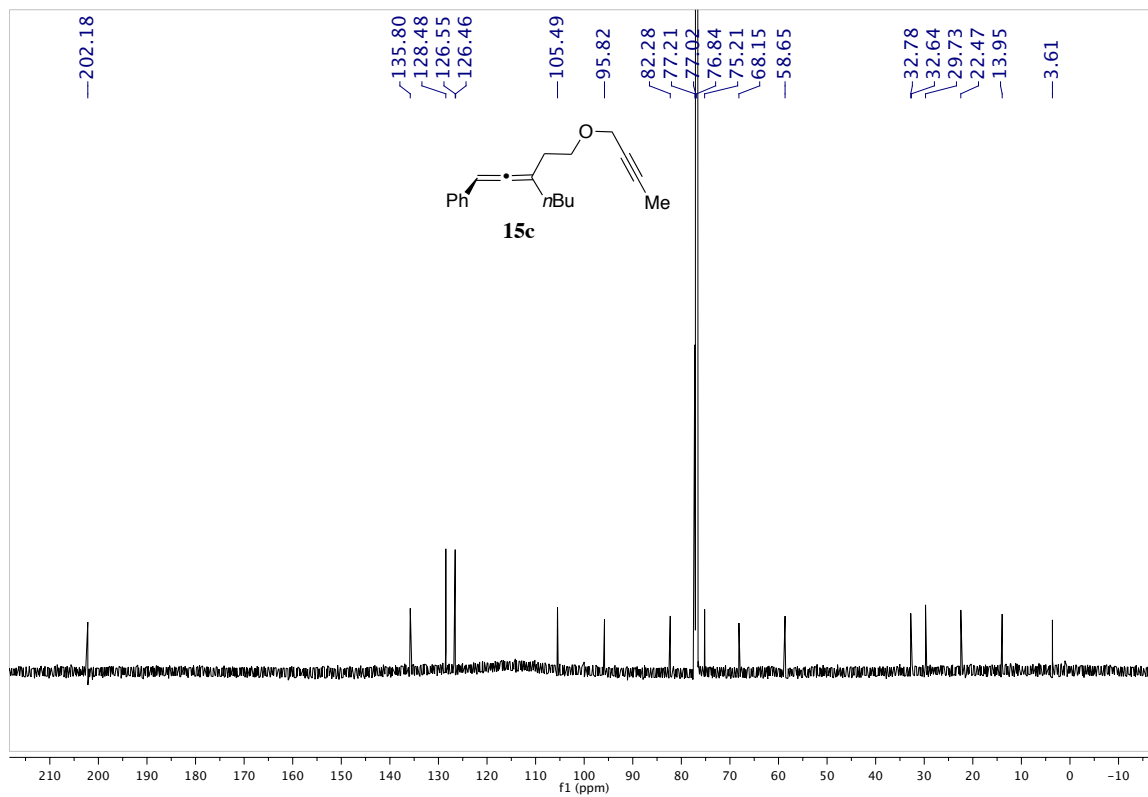

**(S)-5-butyl-8-methyl-6-phenyl-3,4-dihydro-1*H*-cyclopenta[*c*]oxepin-7(6*H*)-one (43c):**

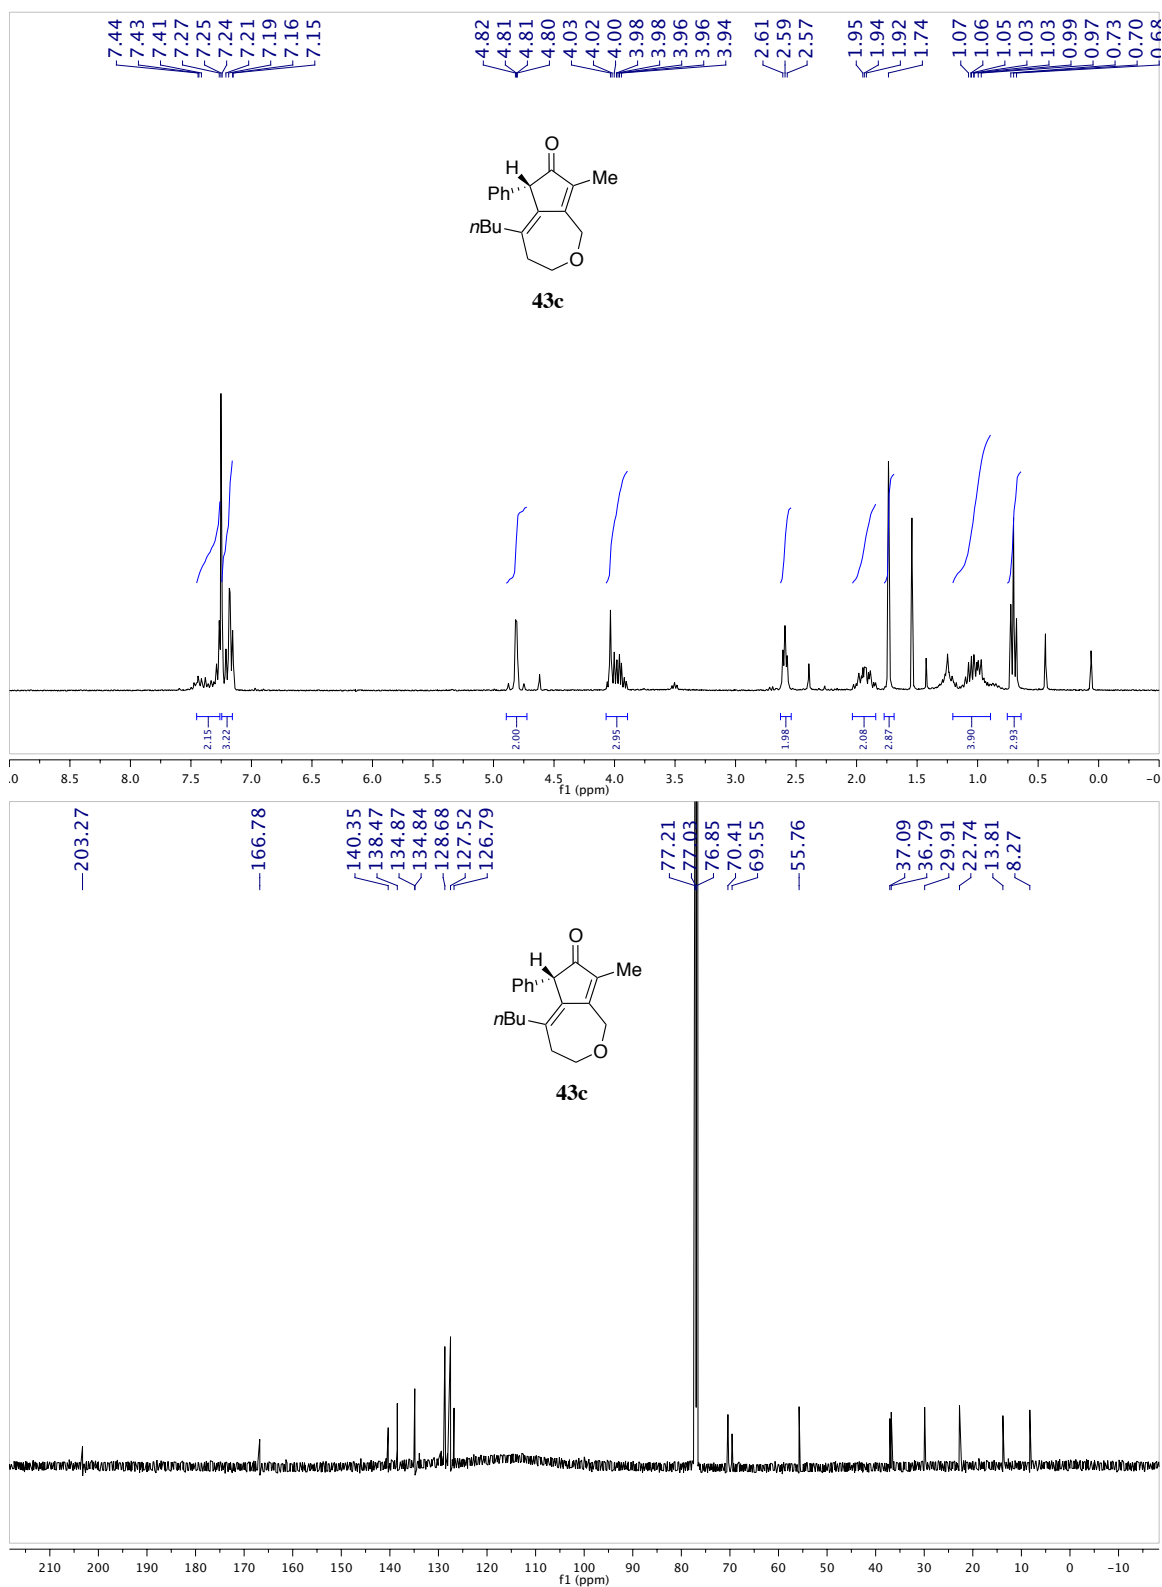

**(*R*<sub>a</sub>)-(3-(2-(prop-2-yn-1-yloxy)ethyl)hepta-1,2-dien-1-yl)benzene (15e):**

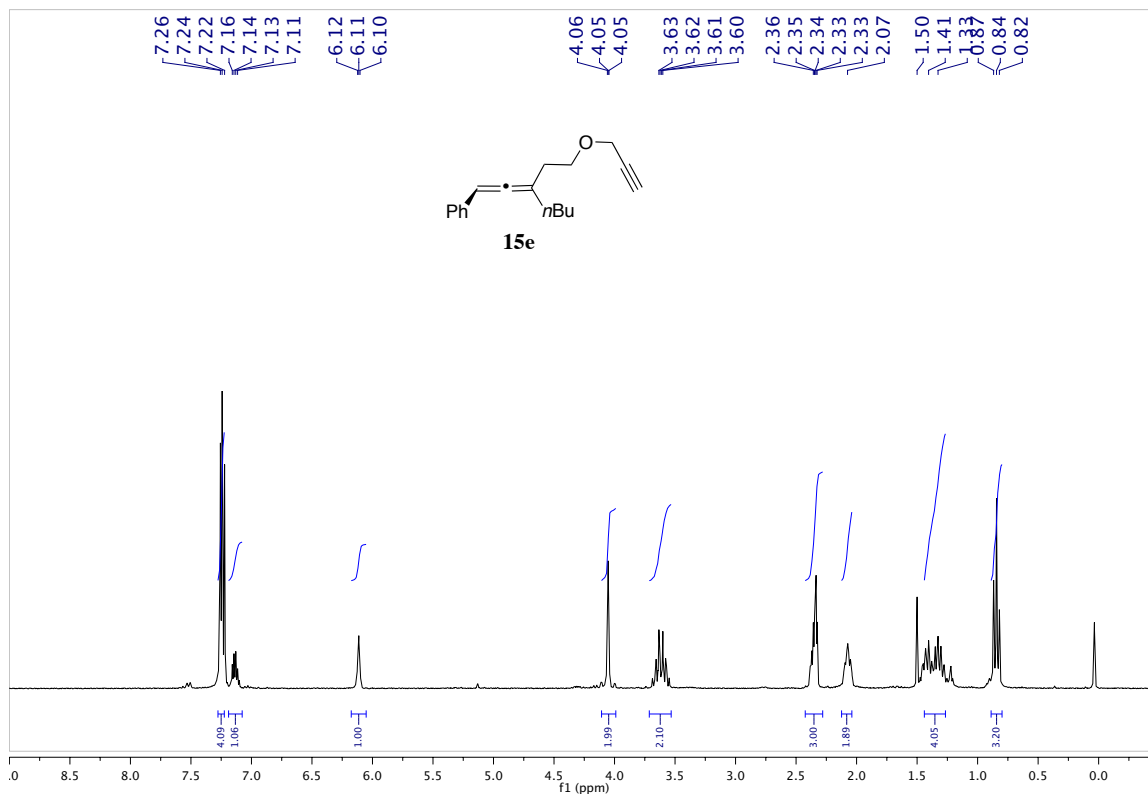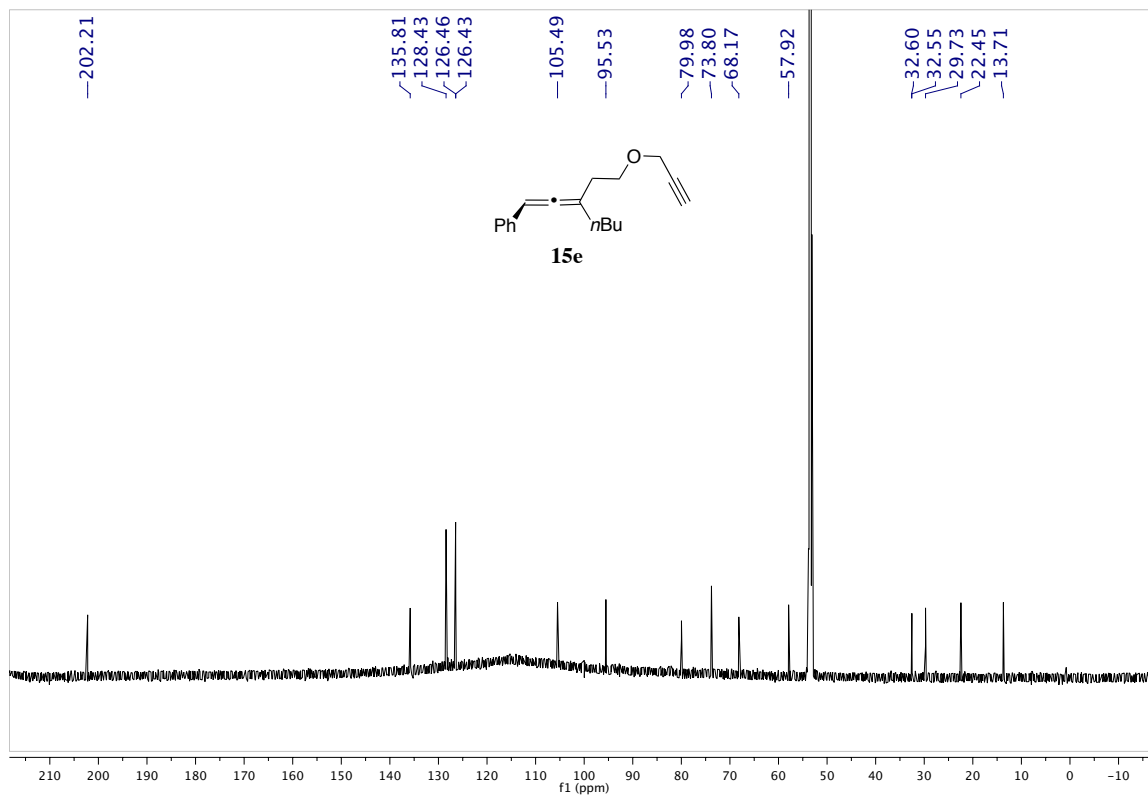

**(*R<sub>a</sub>*)-trimethyl(3-((3-(2-phenylvinylidene)heptyl)oxy)prop-1-yn-1-yl)silane**

**(15f):**

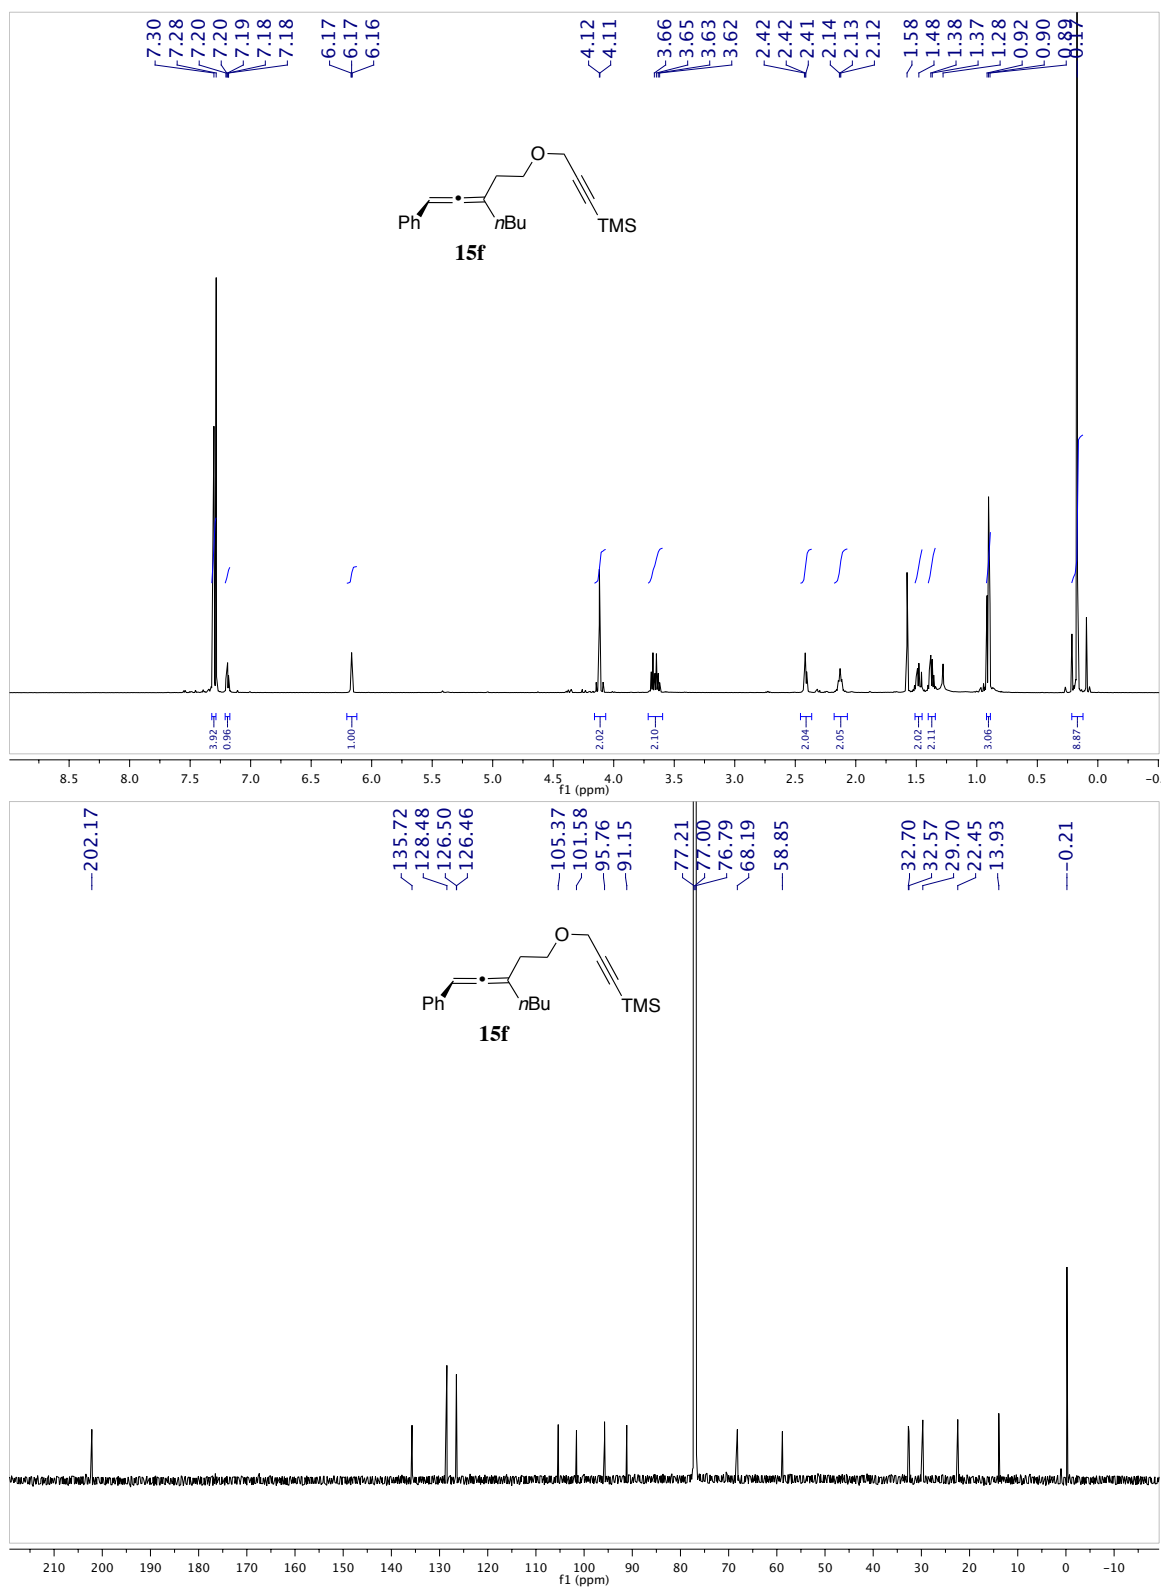



**(S)-5-butyl-6-phenyl-8-(trimethylsilyl)-3,4-dihydro-1H-cyclopenta[c]oxepin-7(6H)-one (43f):**

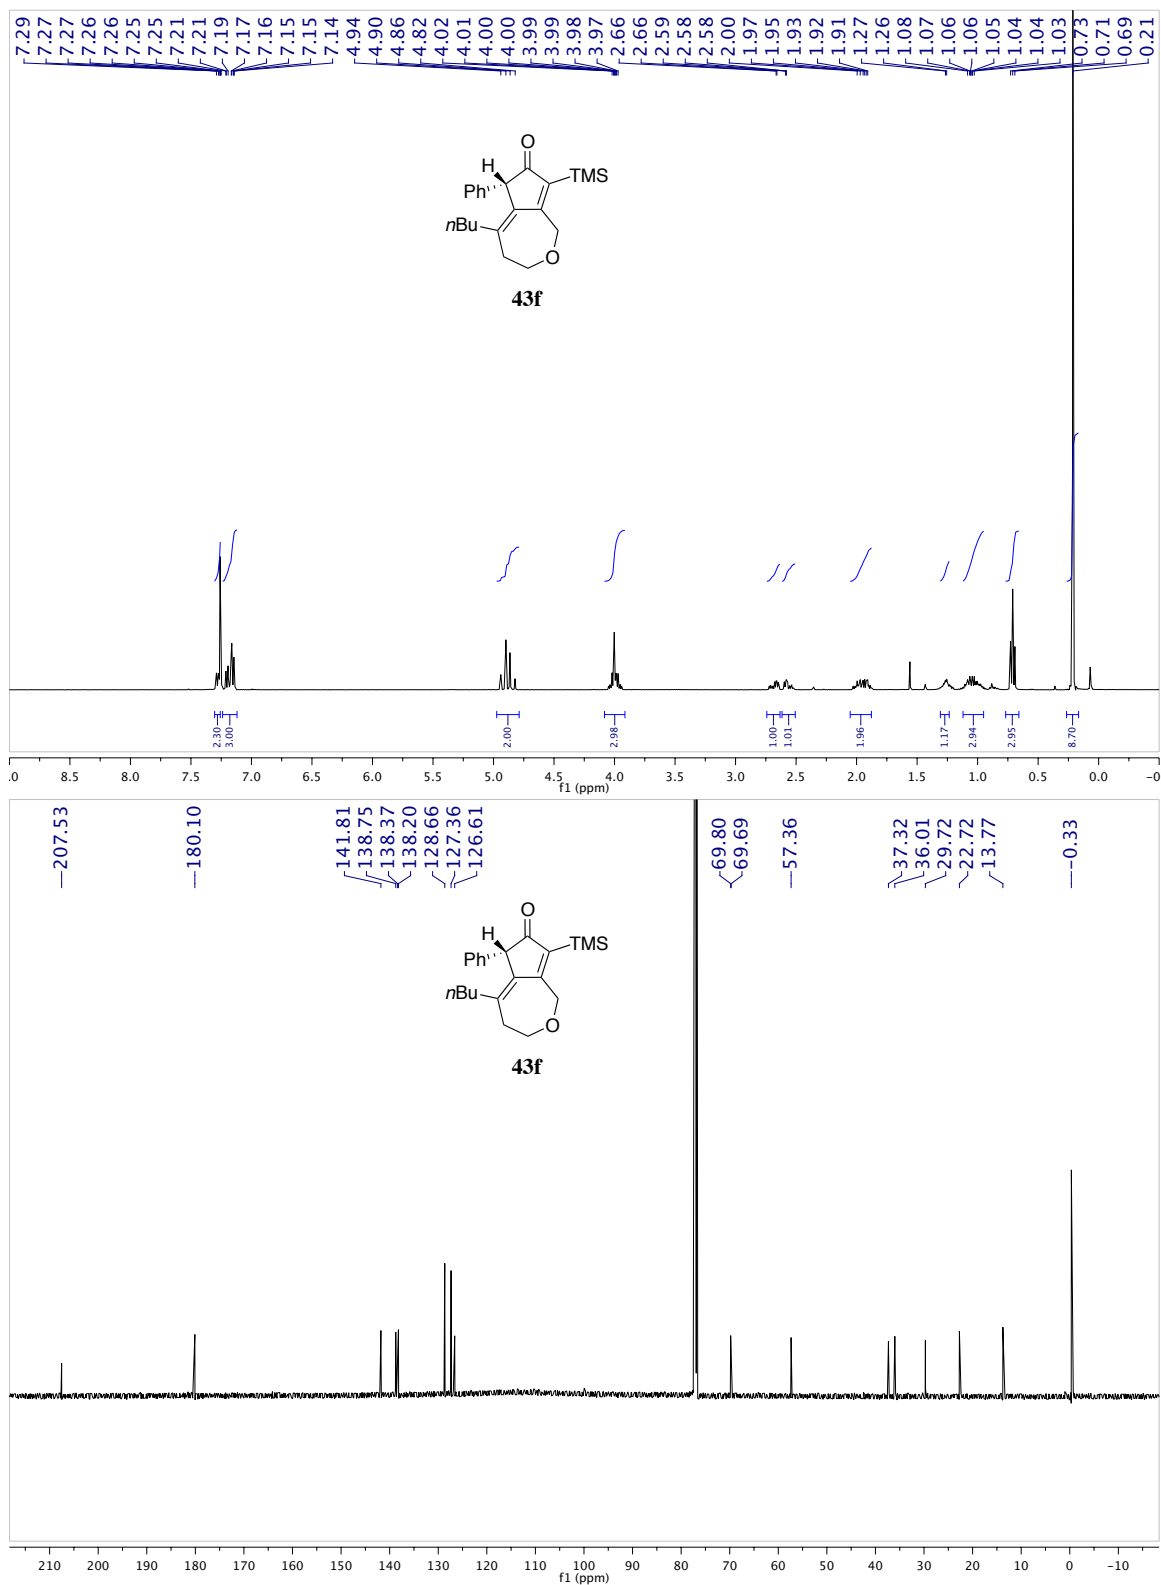

**heptyl)benzenesulfonamide (14g):**

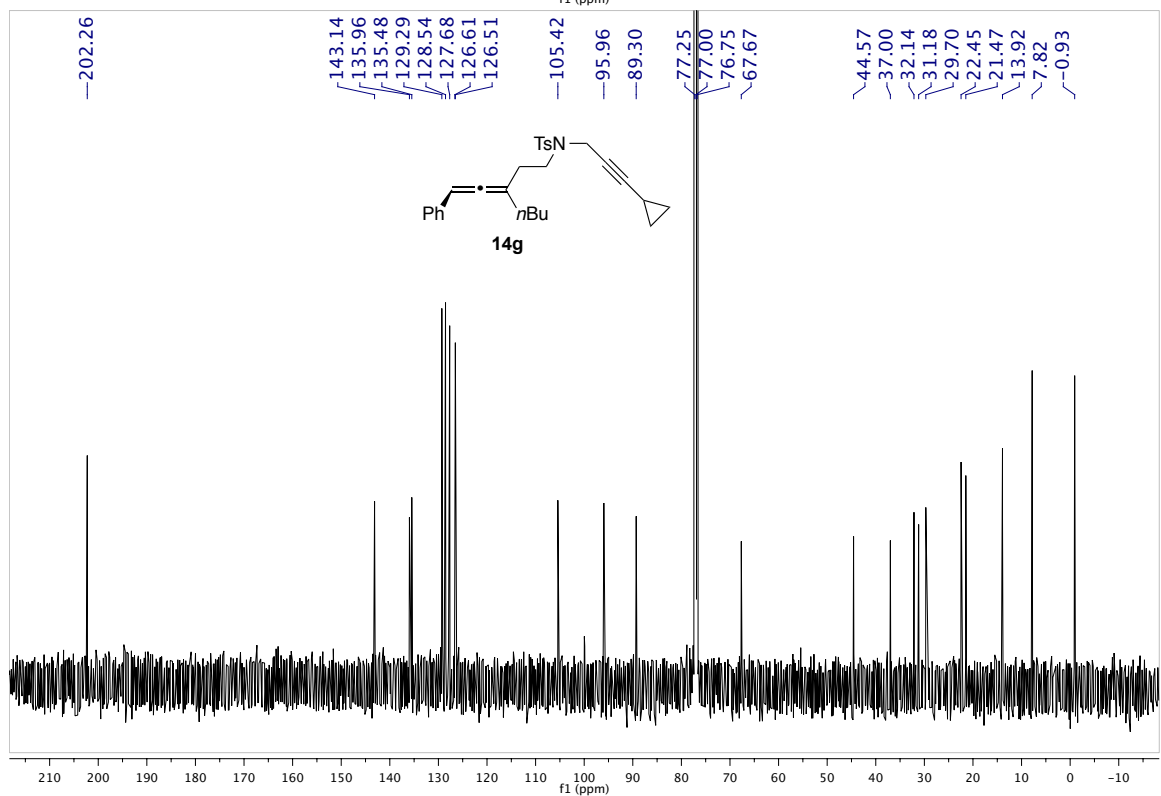

**[c]azepin-7(6*H*)-one (42g):**

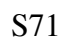

**1-(dimethyl(phenyl)silyl)hept-2-yn-1-ol (24):**

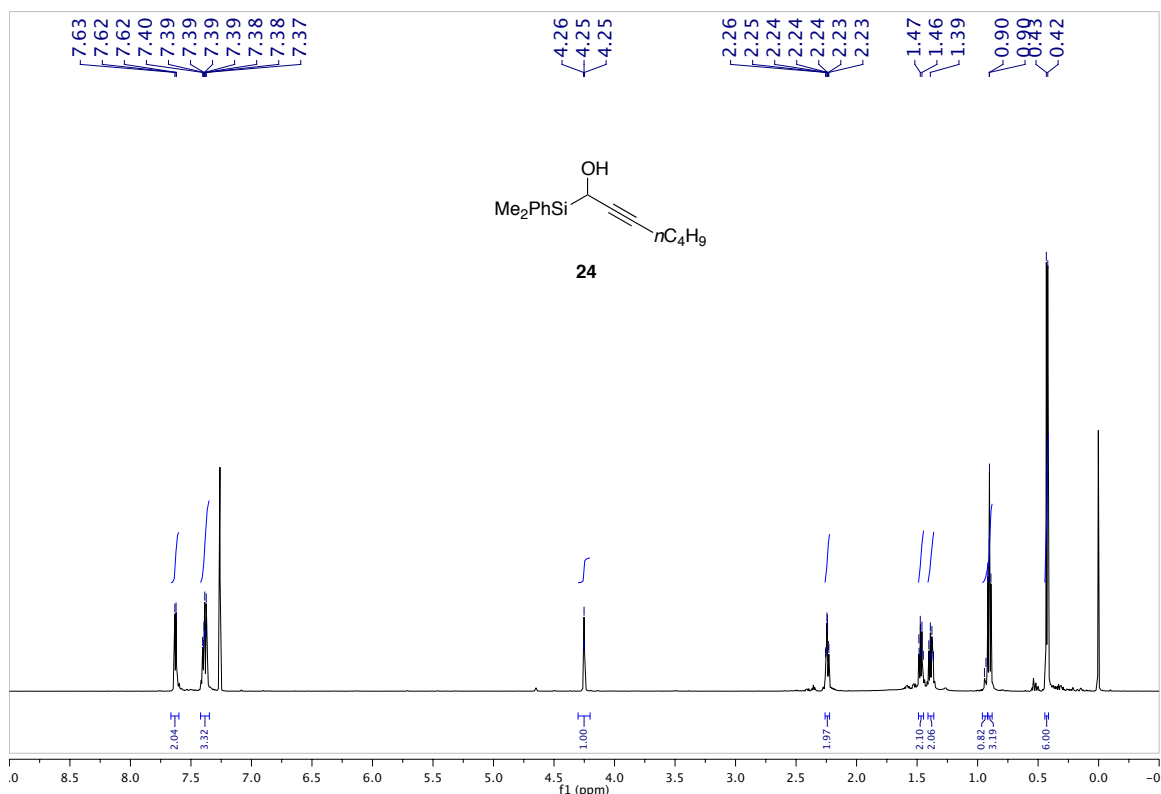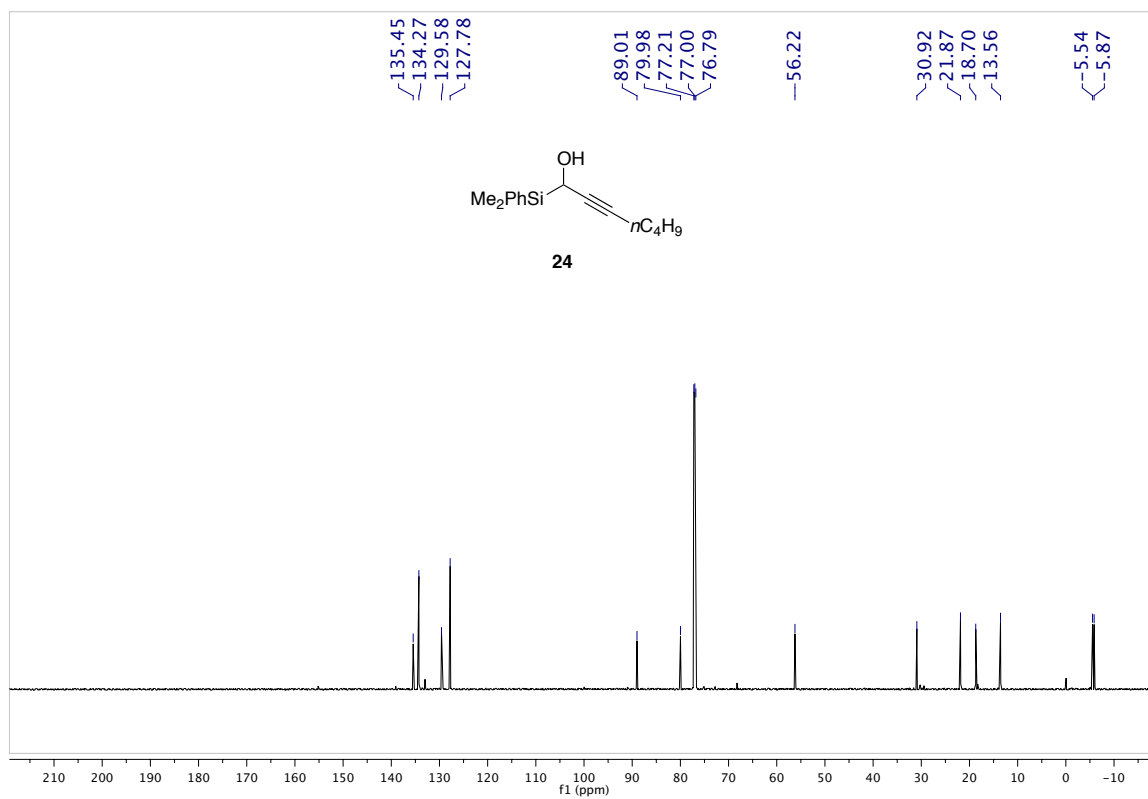

**Methyl 3-(2-(dimethyl(phenyl)silyl)vinylidene)heptanoate (51):**

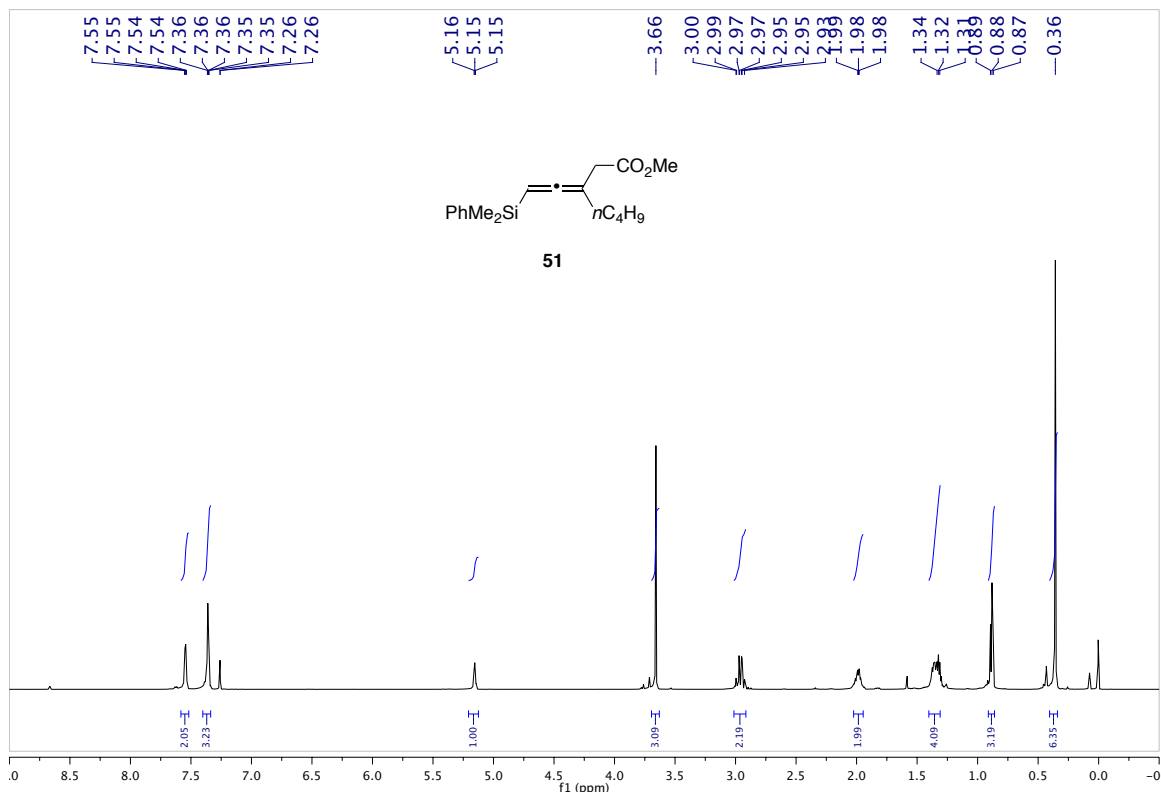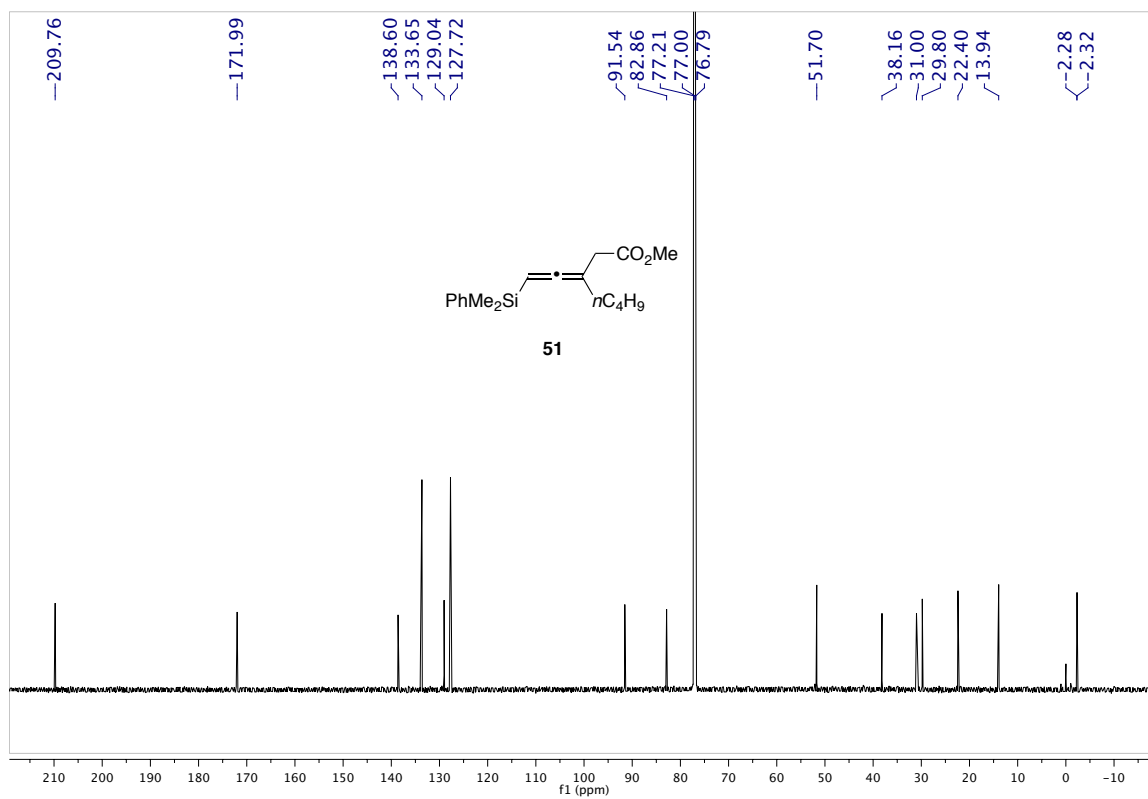

**3-(2-(dimethyl(phenyl)silyl)vinylidene)heptan-1-ol (25):**

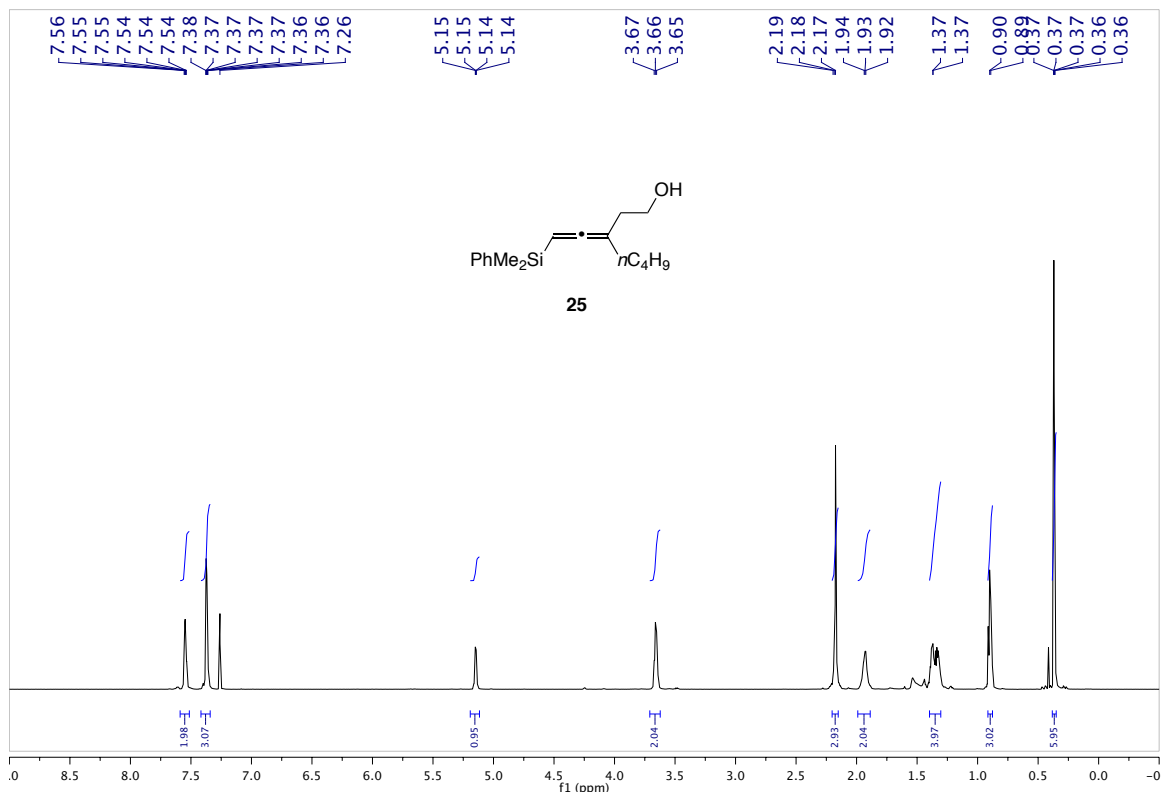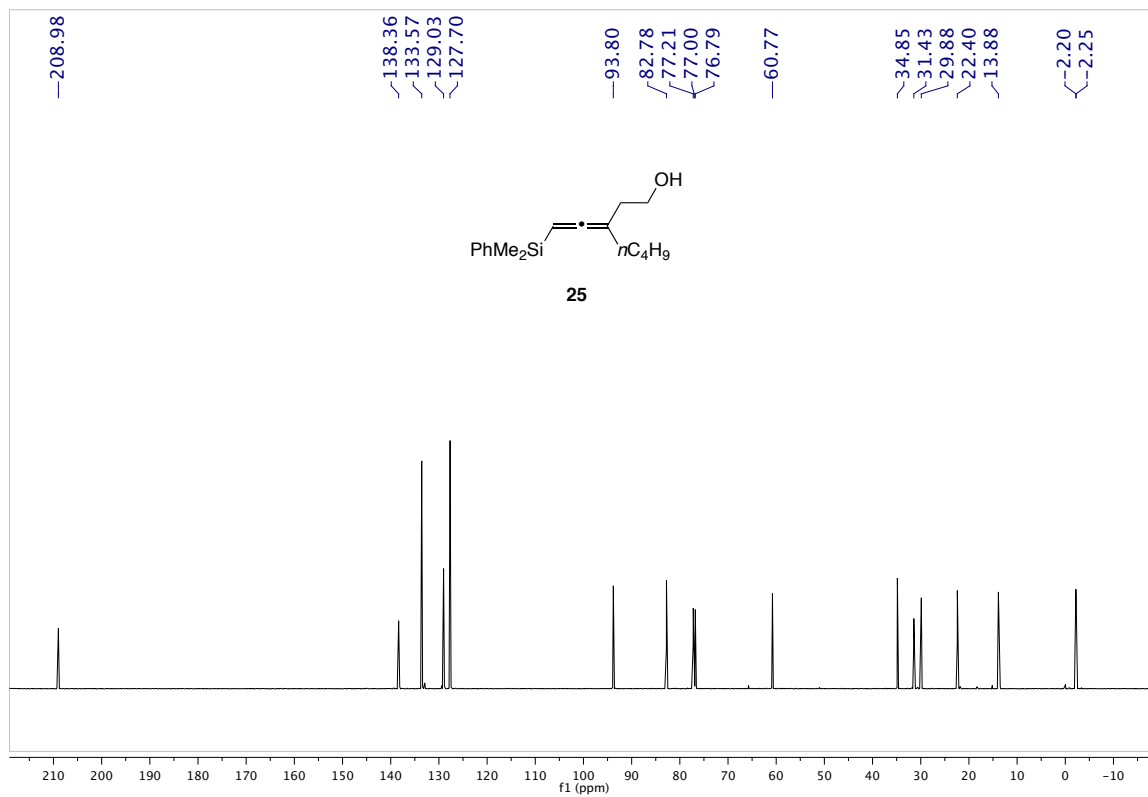

***N*-(but-2-yn-1-yl)-*N*-(3-(2-(dimethyl(phenyl)silyl)vinylidene)heptyl)-4-methylbenzenesulfonamide (40):**

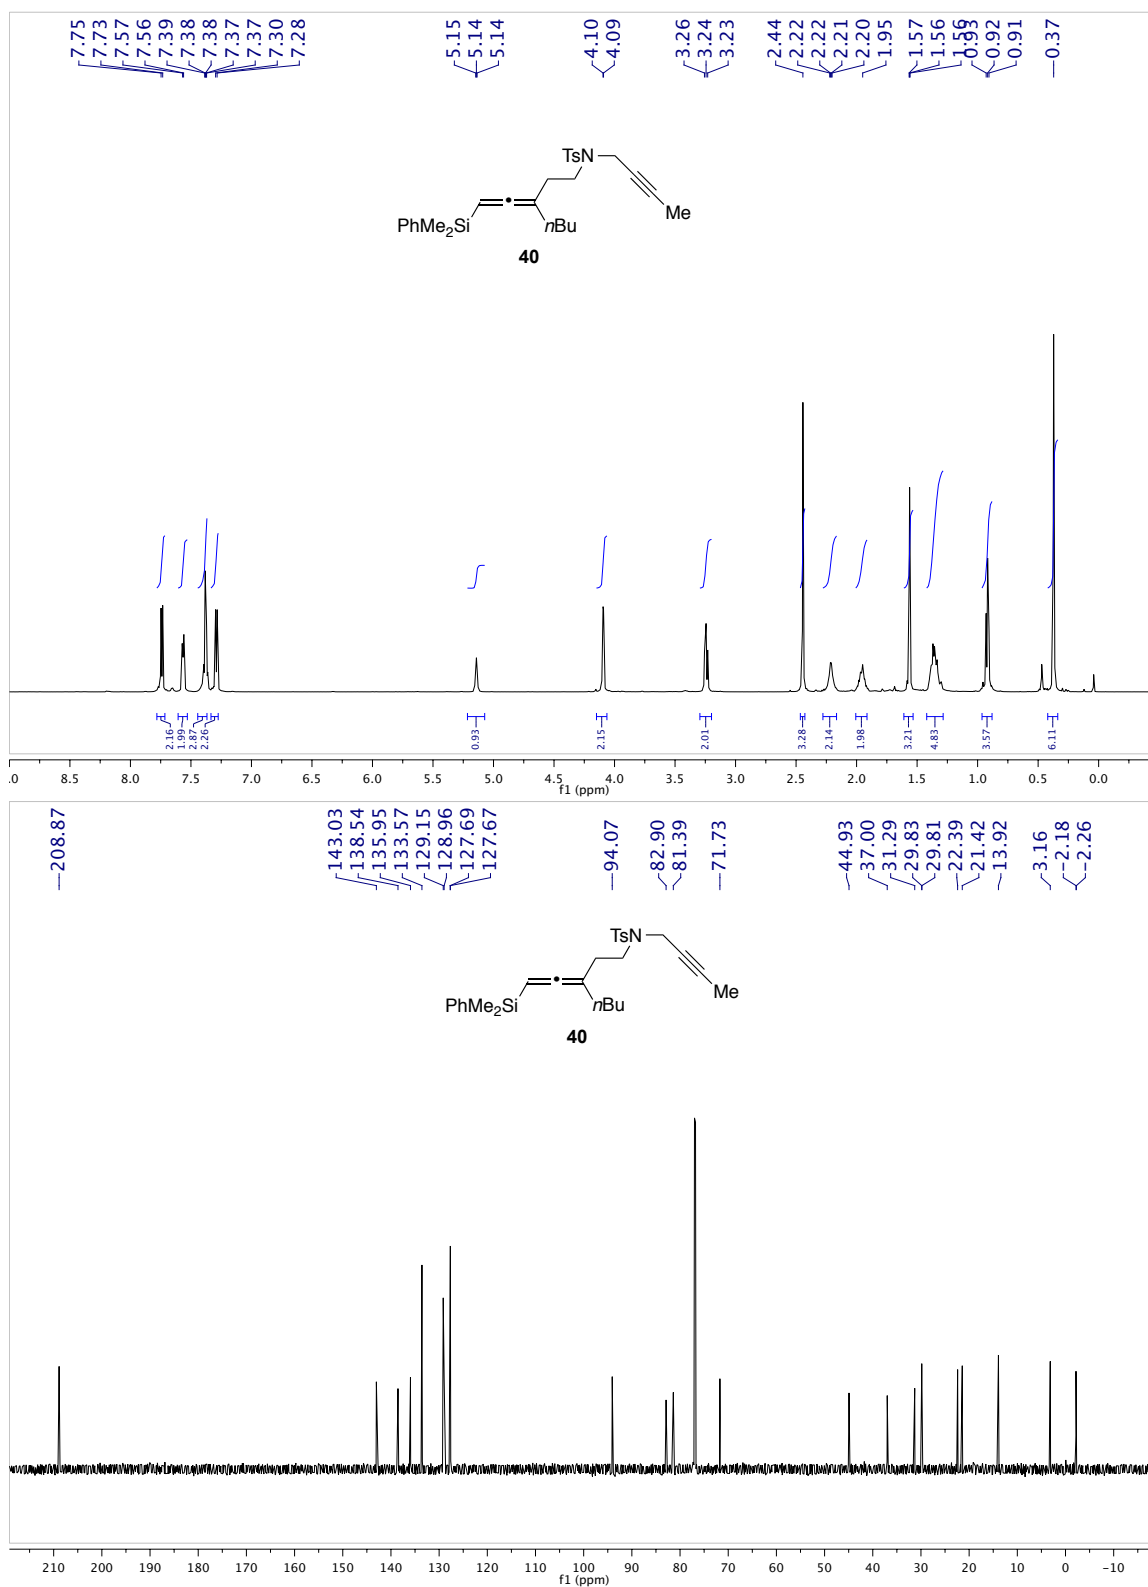

**5-butyl-8-methyl-2-tosyl-1,2,3,4-tetrahydrocyclopenta[c]azepin-7(6H)-one**

**(41):**

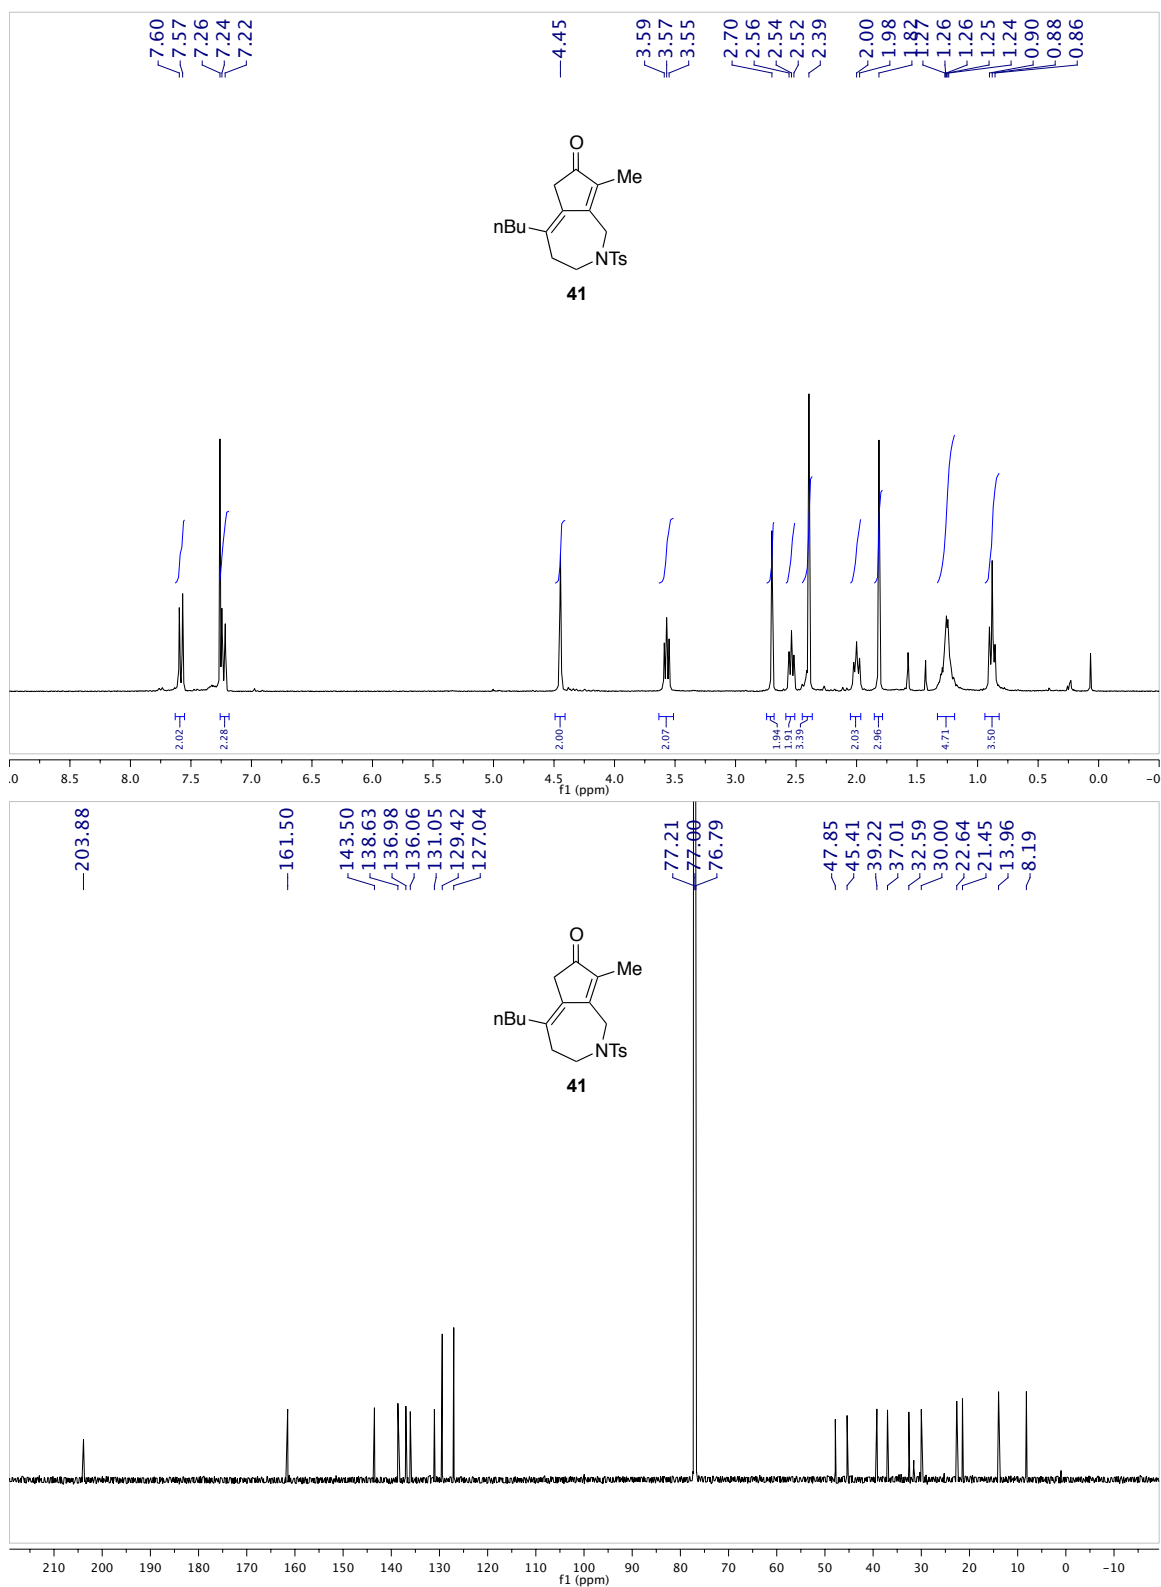



**6-methyl-2-tosyl-2,3,4,5-tetrahydrocyclopenta[c]azepin-7(1H)-one (48):**

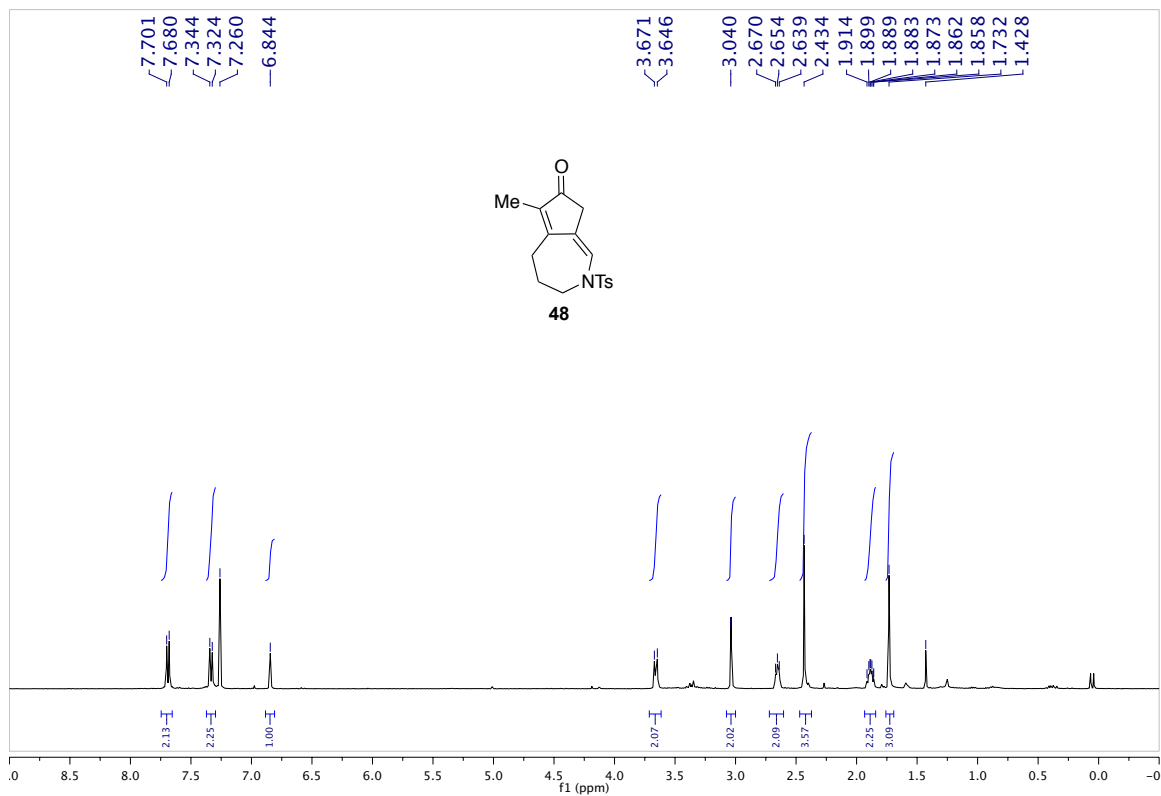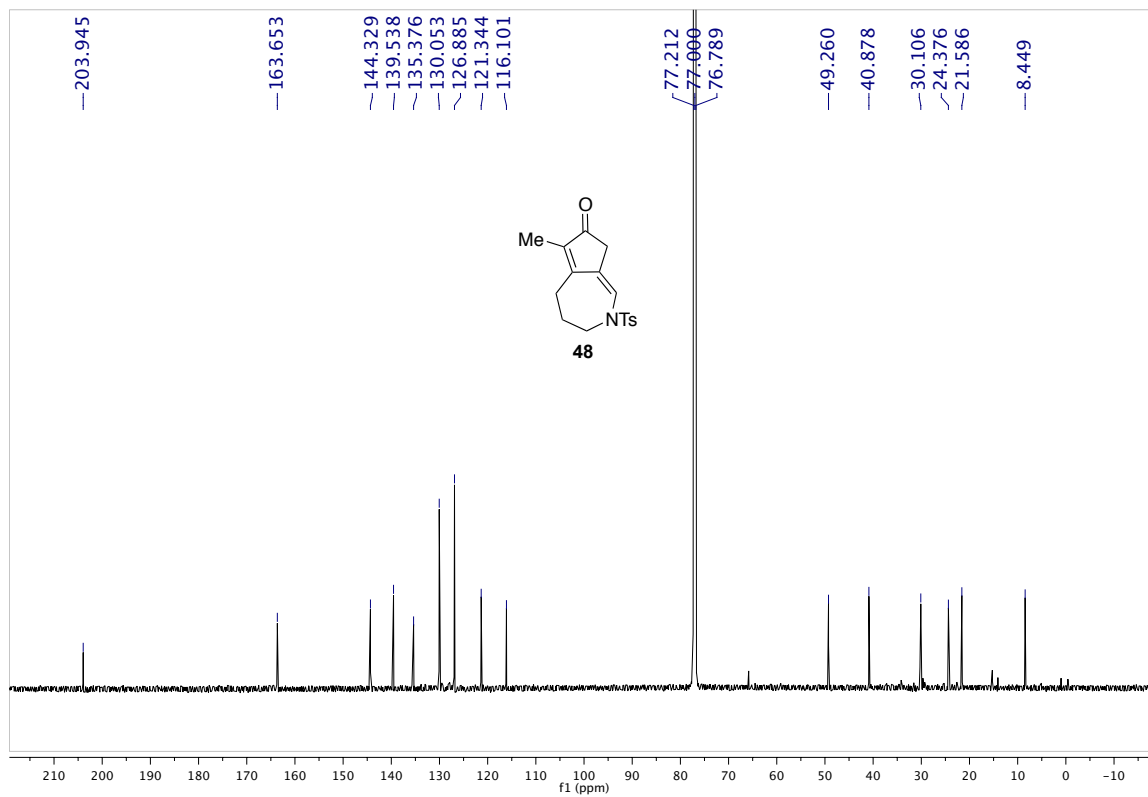

## HPLC and SFC analysis

### (*R<sub>a</sub>*)-hexa-3,4-dien-1-yl 4-nitrobenzoate (**27**) :

The enantiomeric purity of compound **27** was determined by HPLC analysis run on a ChiralCel OD column eluting in 0.5% 2-Propanol/Hexanes, with a 10.0 µL injection and a 0.7 mL/min flow rate. Compound **27** has >99% ee. The peaks are visualized at 254 nm, with the racemic compound ( $\pm$ )-**27** exhibiting peaks with retention times of 13.2 and 14.5 minutes, and the enantioenriched compound **27** exhibiting a major peak with a retention time of 14.5 minutes (minor enantiomer has a retention time of 12.5 minutes).

Values for the racemic compound :

| Ret.<br>Time<br>(min) | Time<br>Offset<br>(min) | Area<br>(counts) | Sep.<br>Code | Width<br>1/2<br>(sec) |
|-----------------------|-------------------------|------------------|--------------|-----------------------|
| 13.218                | 0.000                   | 25468534         | BV           | 0.0                   |
| 14.457                | 0.000                   | 40797532         | VB           | 84.3                  |

Values for the enantiopur compound :

| Ret.<br>Time<br>(min) | Time<br>Offset<br>(min) | Area<br>(counts) | Sep.<br>Code | Width<br>1/2<br>(sec) |
|-----------------------|-------------------------|------------------|--------------|-----------------------|
| 12.541                | 0.000                   | 245811           | BB           | 51.4                  |
| 14.475                | 0.000                   | 56005160         | BB           | 63.8                  |

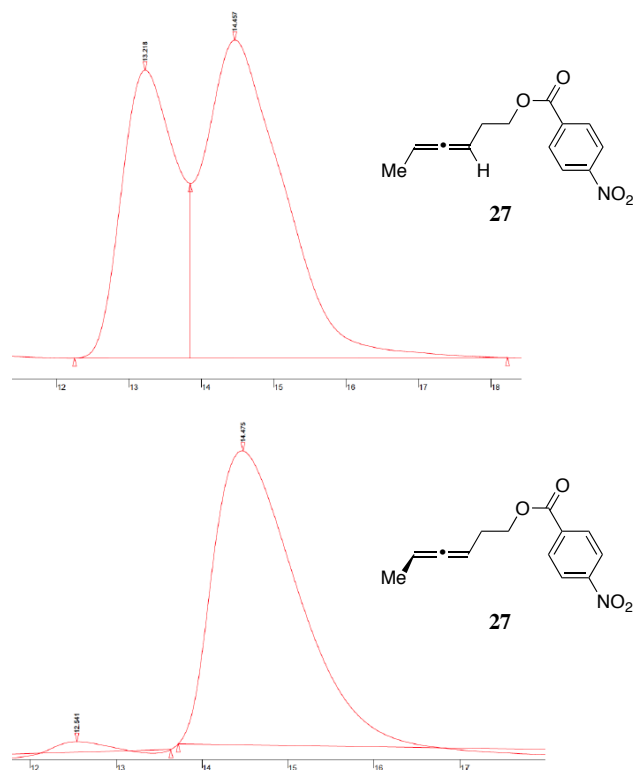

**(S)-6-methyl-8-phenyl-2-tosyl-1,2,3,4-tetrahydrocyclopenta[c]azepin-7(6H)-one (45d):**

The enantiomeric purity of compound **45d** was determined by HPLC analysis run on a ChiralCel OD column eluting in 10% 2-Propanol/Hexanes, with a 20.0  $\mu$ L injection and a 1.0 mL/min flow rate. Compound **45d** has 88% ee. The peaks are visualized at 254 nm, with the racemic compound (+)-**45d** exhibiting equal peaks with retention times of 18.2 and 22.7 minutes, and the enantioenriched compound **45d** exhibiting a major peak with a retention time of 24.0 minutes (minor enantiomer has a retention time of 19.5 minutes).

Values for the racemic compound :

| Ret.<br>Time<br>(min) | Time<br>Offset<br>(min) | Area<br>(counts) | Sep.<br>Code | Width<br>1/2<br>(sec) |
|-----------------------|-------------------------|------------------|--------------|-----------------------|
| 18.208                | 0.000                   | 5360886          | BV           | 97.8                  |
| 22.669                | 0.000                   | 5114108          | VB           | 121.5                 |

Values for the enantiopur compound :

| Ret.<br>Time<br>(min) | Time<br>Offset<br>(min) | Area<br>(counts) | Sep.<br>Code | Width<br>1/2<br>(sec) |
|-----------------------|-------------------------|------------------|--------------|-----------------------|
| 19.527                | 0.000                   | 905205           | BB           | 100.7                 |
| 24.018                | 0.000                   | 13844659         | BB           | 129.4                 |

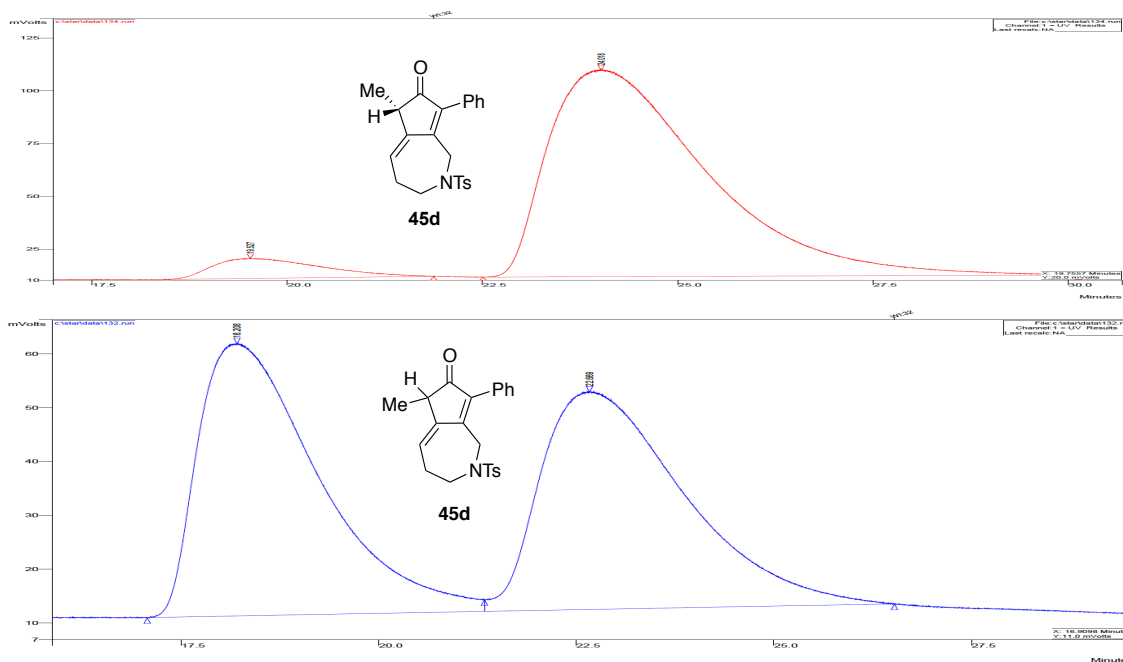

**(S)-6-methyl-2-tosyl-8-(trimethylsilyl)-1,2,3,4-tetrahydrocyclopenta[c]azepin-7(6H)-one (45f):**

The enantiomeric purity of compound **45f** was determined by SFC analysis run on a Chiralpak IC column using 15% MeOH as mobile phase with a 10  $\mu$ L injection, a 3.0 mL/min flow rate and a pressure of 100 bar. The compound has 84% ee. The peaks are visualized at 220 nm, with the racemic alcohol (+)-**45f** exhibiting equal peaks with retention times of 8.7 and 9.2 minutes, and the enantioenriched compound **45f** exhibiting a major peak with a retention time of 9.5 minutes (minor enantiomer has a retention time of 8.8 minutes).

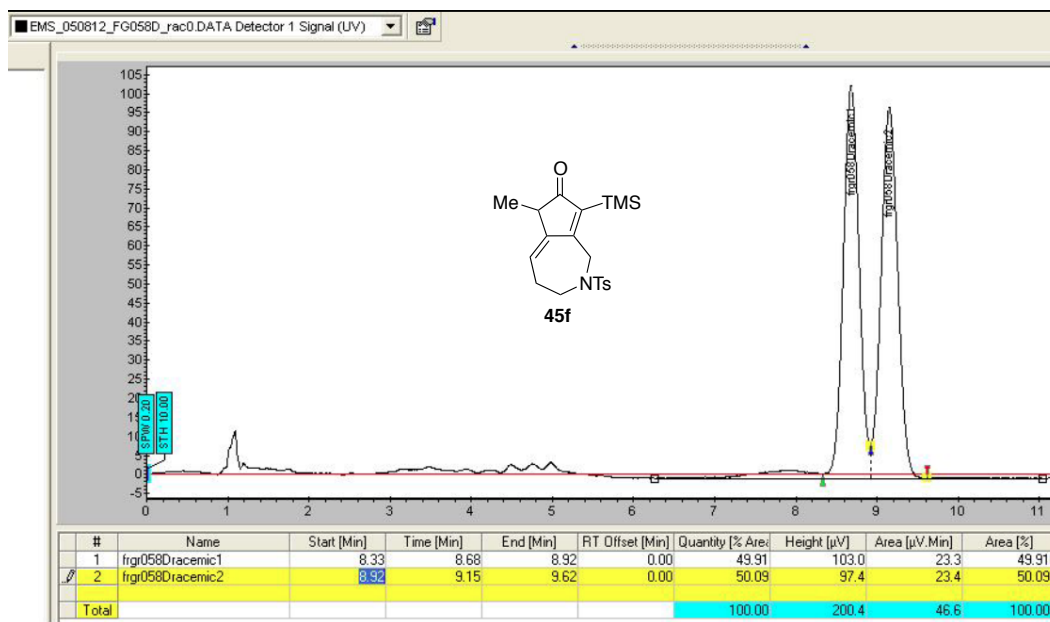

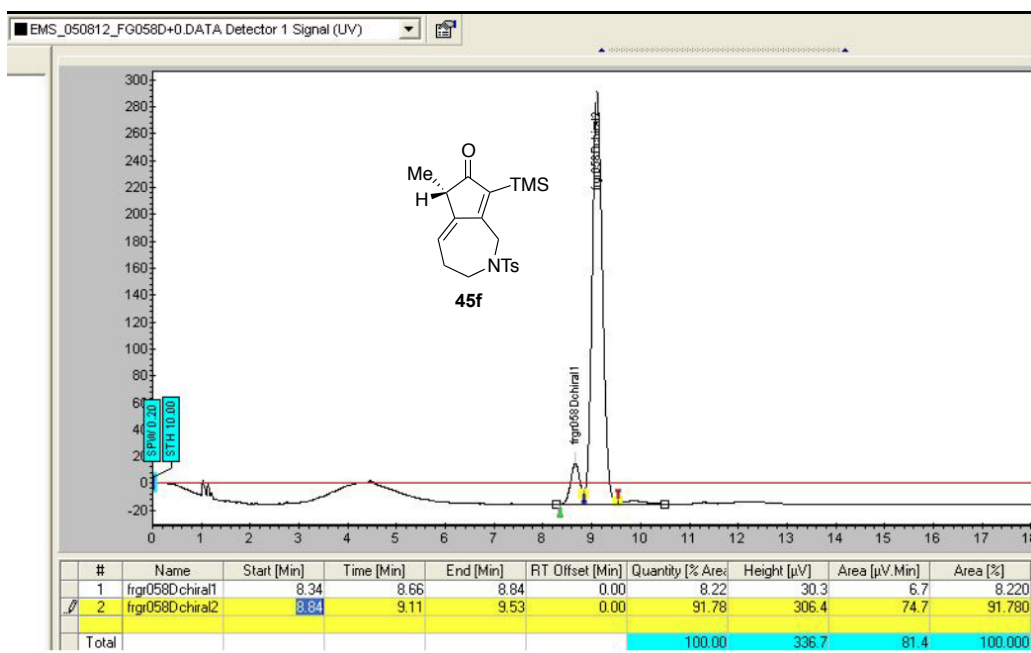

**(S)-6,8-dimethyl-2-tosyl-1,2,3,4-tetrahydrocyclopenta[c]azepin-7(6H)-one (45c):**

The enantiomeric purity of compound **45c** was determined by HPLC analysis run on a ChiralPak IA-3 column eluting in 25% 2-Propanol/Hexanes, with a 20.0 μL injection and a 1.0 mL/min flow rate. Compound **45c** has 81% ee. The peaks are visualized at 254 nm, with the racemic compound (+)-**45c** exhibiting equal peaks with retention times of 7.8 and 8.2 minutes, and the enantioenriched compound **45c** exhibiting a major peak with a retention time of 8.1 minutes (minor enantiomer has a retention time of 7.7 minutes).

Values for the racemic compound :

| Ret.<br>Time<br>(min) | Time<br>Offset<br>(min) | Area<br>(counts) | Sep.<br>Code | Width<br>1/2<br>(sec) |
|-----------------------|-------------------------|------------------|--------------|-----------------------|
| 7.752                 | 0.000                   | 4731948          | BV           | 8.6                   |
| 8.195                 | 0.000                   | 4894754          | VB           | 9.2                   |

Values for the enantiopur compound :

| Ret.<br>Time<br>(min) | Time<br>Offset<br>(min) | Area<br>(counts) | Sep.<br>Code | Width<br>1/2<br>(sec) |
|-----------------------|-------------------------|------------------|--------------|-----------------------|
| 7.667                 | 0.000                   | 1297389          | BV           | 8.0                   |
| 8.077                 | 0.000                   | 12220102         | VB           | 9.4                   |

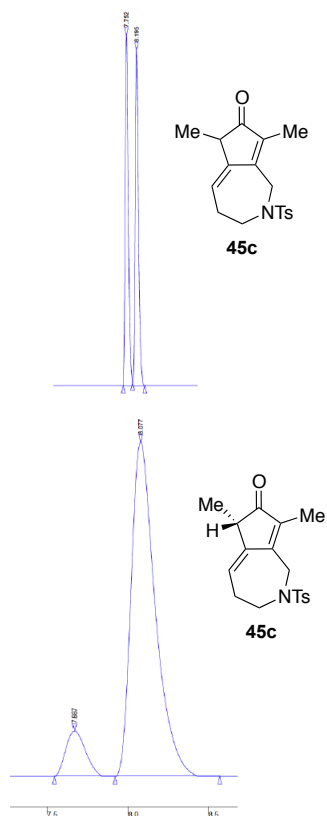

**(S)-Diethyl 1-methyl-2-oxo-3-phenyl-1,2,6,7-tetrahydroazulene-5,5(4H)-dicarboxylate (47d):**

The enantiomeric purity of compound **47d** was determined by HPLC analysis run on a ChiralCel OD column eluting in 2% 2-Propanol/Hexanes, with a 10.0 µL injection and a 1.0 mL/min flow rate. Compound **47d** has 72% ee. The peaks are visualized at 254 nm, with the racemic compound (+)-**47d** exhibiting equal peaks with retention times of 14.3 and 20.2 minutes, and the enantioenriched compound **47d** exhibiting a major peak with a retention time of 19.9 minutes (minor enantiomer has a retention time of 14.7 minutes).

Values for the racemic compound :

| Ret.<br>Time<br>(min) | Time<br>Offset<br>(min) | Area<br>(counts) | Sep.<br>Code | Width<br>1/2<br>(sec) |
|-----------------------|-------------------------|------------------|--------------|-----------------------|
| 14.323                | 0.000                   | 11606653         | VB           | 69.7                  |
| 20.259                | 0.000                   | 11491699         | BB           | 96.7                  |

Values for the enantiopur compound :

| Ret.<br>Time<br>(min) | Time<br>Offset<br>(min) | Area<br>(counts) | Sep.<br>Code | Width<br>1/2<br>(sec) |
|-----------------------|-------------------------|------------------|--------------|-----------------------|
| 14.779                | 0.000                   | 1481368          | BB           | 91.5                  |
| 19.943                | 0.000                   | 9223214          | BB           | 99.8                  |



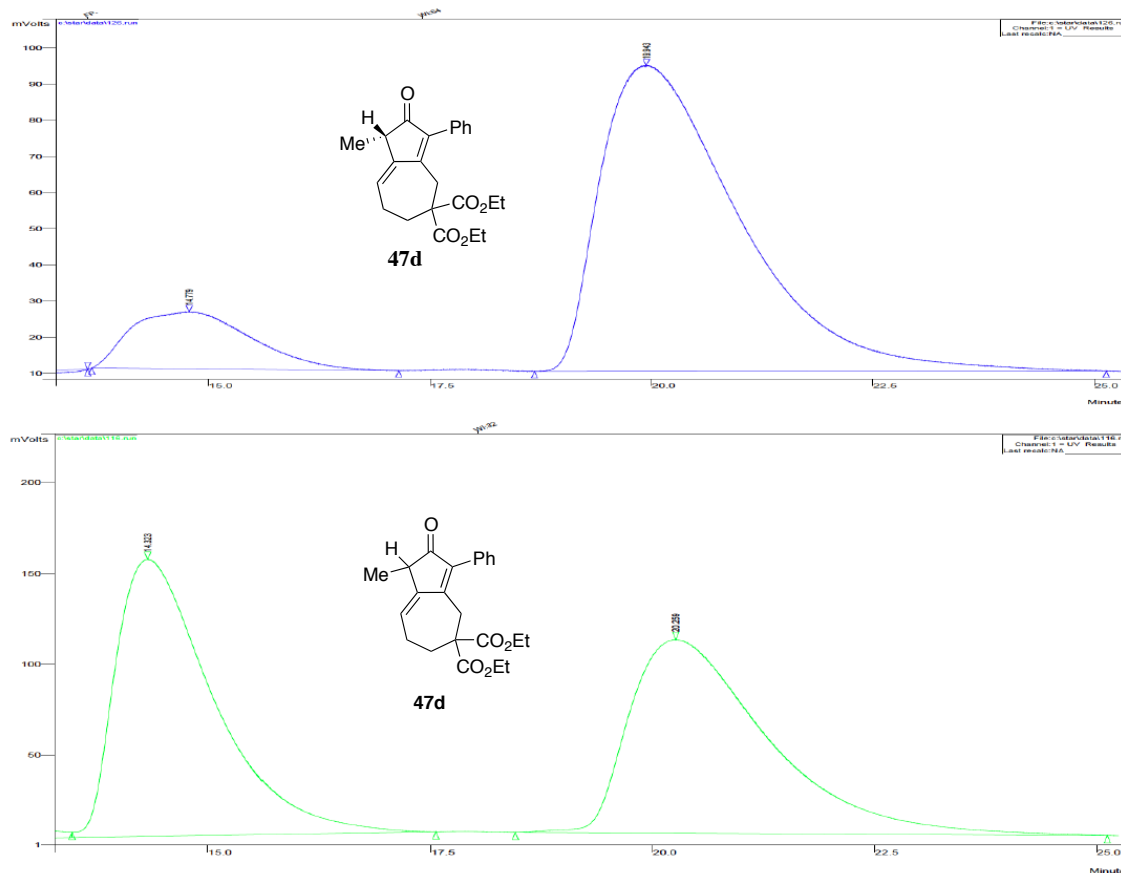

**(S)-diethyl 1,3-dimethyl-2-oxo-1,2,6,7-tetrahydroazulene-5,5(4H)-dicarboxylate (**47c**):**

The enantiomeric purity of compound **47c** was determined by HPLC analysis run on a Whelk O-1 column eluting in 3% 2-Propanol/Hexanes, with a 10.0  $\mu$ L injection and a 1.0 mL/min flow rate. Compound **47c** has 58% ee. The peaks are visualized at 254 nm, with the racemic compound ( $\pm$ )-**47c** exhibiting equal peaks with retention times of 33.3 and 40.7 minutes, and the enantioenriched compound **47c** exhibiting a major peak with a retention time of 37.3 minutes (minor enantiomer has a retention time of 32.4 minutes).

Values for the racemic compound :

| Ret.<br>Time<br>(min) | Time<br>Offset<br>(min) | Area<br>(counts) | Sep.<br>Code | Width<br>1/2<br>(sec) |
|-----------------------|-------------------------|------------------|--------------|-----------------------|
| 33.348                | 0.000                   | 3892636          | BB           | 69.0                  |
| 40.707                | 0.000                   | 4949763          | BB           | 51.1                  |

Values for the enantiopur compound :

| Ret.<br>Time<br>(min) | Time<br>Offset<br>(min) | Area<br>(counts) | Sep.<br>Code | Width<br>1/2<br>(sec) |
|-----------------------|-------------------------|------------------|--------------|-----------------------|
| 32.453                | 0.000                   | 1630725          | BB           | 49.5                  |
| 37.301                | 0.000                   | 6055692          | BB           | 90.6                  |

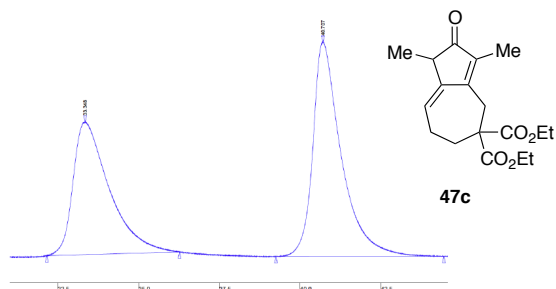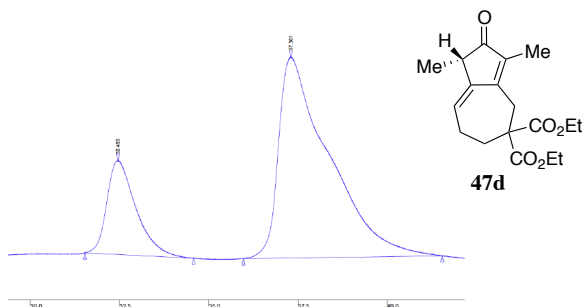

**(S)-diethyl 1-methyl-2-oxo-3-(trimethylsilyl)-1,2,6,7-tetrahydroazulene-5,5(4H)-dicarboxylate (47f):**

The enantiomeric purity of compound **47f** was determined by SFC analysis run on a Chiralpak IC column using 5% MeOH as mobile phase with a 10  $\mu$ L injection, 3.0 mL/min flow rate and a pressure of 100 bars. The compound has 50% ee. The peaks are visualized at 220 nm, with the racemic alcohol (+)-**47f** exhibiting equal peaks with retention times of 5.1 and 5.8 minutes, and the enantioenriched compound **47f** exhibiting a major peak with a retention time of 5.9 minutes (minor enantiomer has a retention time of 5.1 minutes).

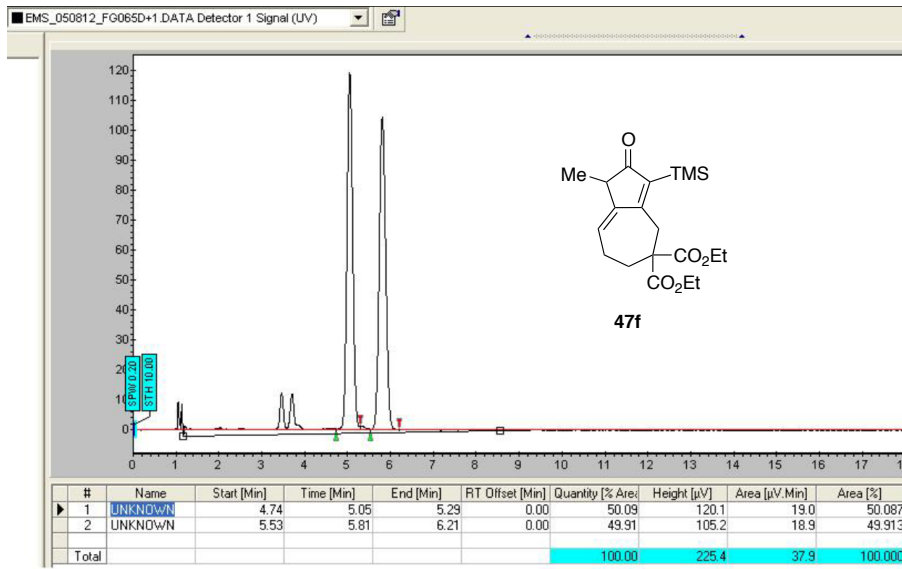

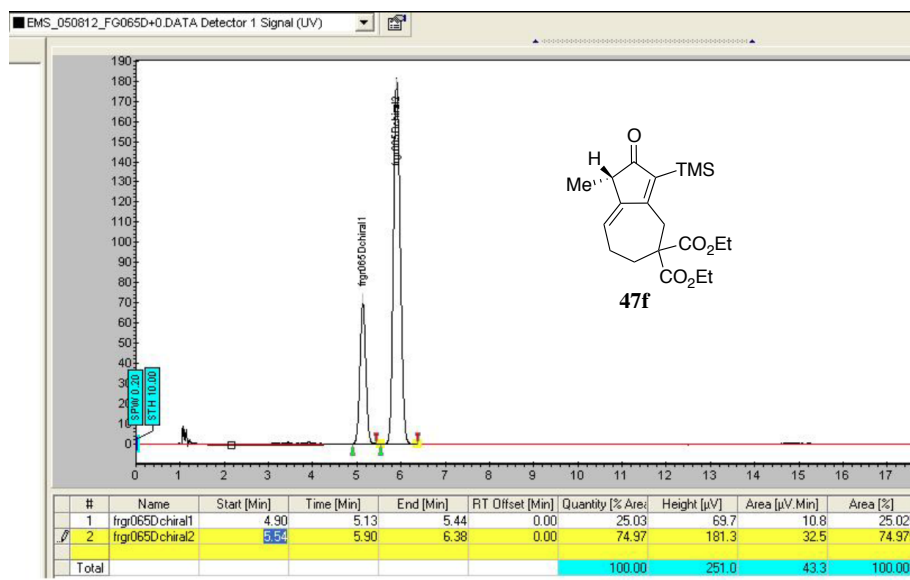

**(S)-6,8-dimethyl-3,4-dihydro-1*H*-cyclopenta[*c*]oxepin-7(6*H*)-one (**46c**):**

The enantiomeric purity of compound **46c** was determined by HPLC analysis run on a ChiralCel OD column eluting in 0.5% 2-Propanol/Hexanes, with a 20.0 μL injection and a 0.7 mL/min flow rate.

HPLC analysis with obtained when 100% of the starting material was consumed :

Compound **46c** has 45% ee. The peaks are visualized at 254 nm, with the racemic compound ( $\pm$ )-**46c** exhibiting equal peaks with retention times of 19.9 and 24.5 minutes, and the enantioenriched compound **46c** exhibiting a major peak with a retention time of 24.1 minutes (minor enantiomer has a retention time of 19.5 minutes).

Values for the racemic compound :

| Ret.<br>Time<br>(min) | Time<br>Offset<br>(min) | Area<br>(counts) | Sep.<br>Code | Width<br>1/2<br>(sec) |
|-----------------------|-------------------------|------------------|--------------|-----------------------|
| 19.888                | 0.000                   | 6517219          | BB           | 94.9                  |
| 24.521                | 0.000                   | 6914815          | BB           | 113.9                 |

Values for the enantiopur compound :

| Ret.<br>Time<br>(min) | Time<br>Offset<br>(min) | Area<br>(counts) | Sep.<br>Code | Width<br>1/2<br>(sec) |
|-----------------------|-------------------------|------------------|--------------|-----------------------|
| 19.542                | 0.000                   | 4570302          | BB           | 89.9                  |
| 24.090                | 0.000                   | 12276439         | BB           | 116.1                 |

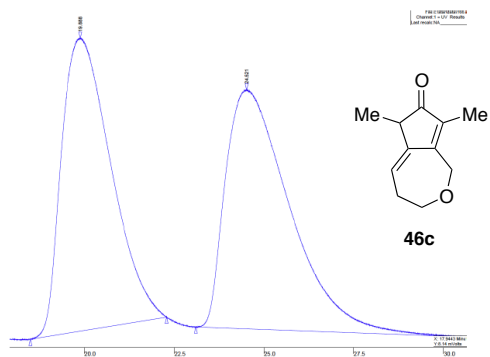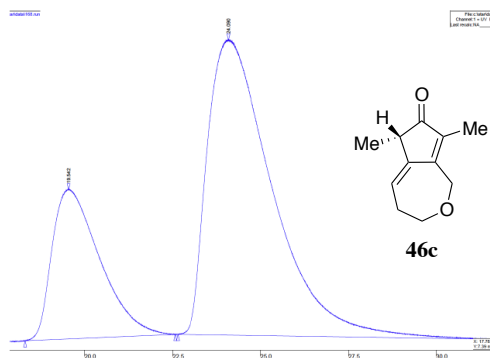

HPLC analysis when the reaction was stopped at 60% conversion<sup>1</sup>:

Compound **46c** has 43% ee. The peaks are visualized at 254 nm, with the enantioenriched compound **46c** exhibiting a major peak with a retention time of 26.6 minutes (minor enantiomer has a retention time of 21.9 minutes).

Values for the enantiopur compound :

| Ret.<br>Time<br>(min) | Time<br>Offset<br>(min) | Area<br>(counts) | Sep.<br>Code | Width<br>1/2<br>(sec) |
|-----------------------|-------------------------|------------------|--------------|-----------------------|
| 21.957                | 0.000                   | 3384316          | BB           | 113.6                 |
| 26.649                | 0.000                   | 8469223          | BV           | 124.5                 |

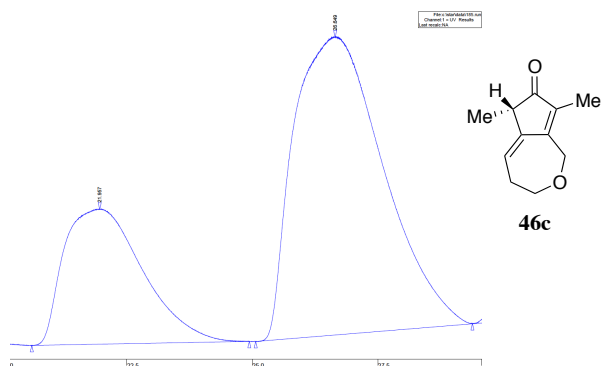

<sup>1</sup> The conversion was determined based on the crude <sup>1</sup>H NMR.

**(S)-6-methyl-3,4-dihydro-1H-cyclopenta[c]oxepin-7(6H)-one (46e):**

The enantiomeric purity of compound **46e** was determined by SFC analysis run on a Chiralpak IA column using 5% MeOH as mobile phase with a 10  $\mu$ L injection, a 3.0 mL/min flow rate and a pressure of 100 bars. The compound has 30% ee. The peaks are visualized at 220 nm, with the racemic alcohol (+)-**46e** exhibiting equal peaks with retention times of 4.7 and 5.3 minutes, and the enantioenriched compound **46e** exhibiting a major peak with a retention time of 5.0 minutes (minor enantiomer has a retention time of 5.6 minutes).

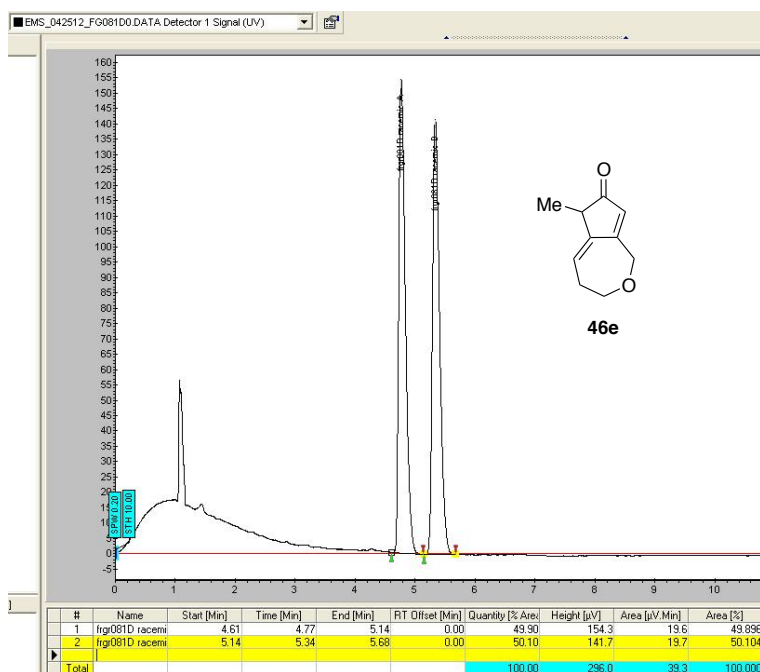

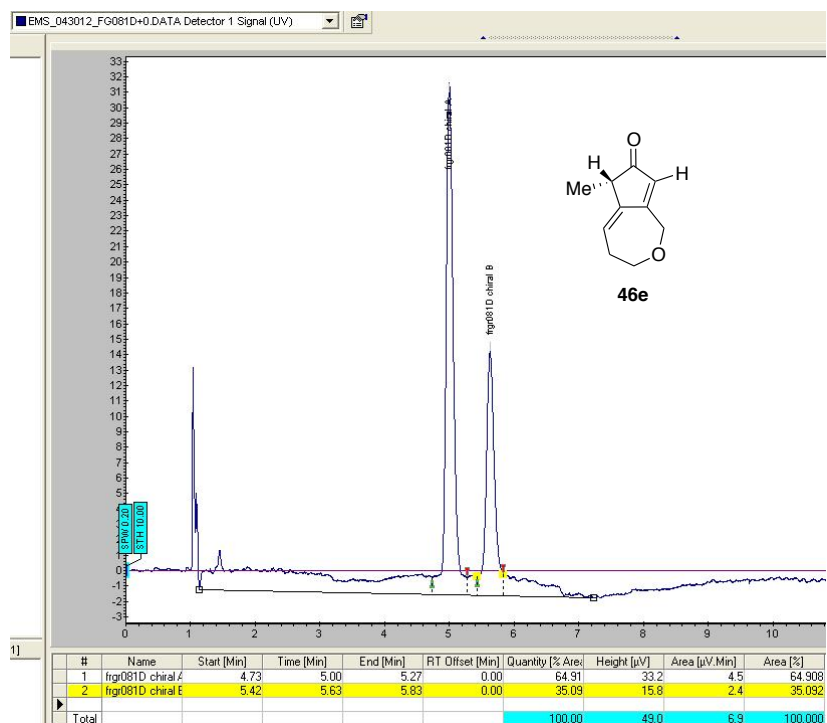

**(S)-6-methyl-8-(trimethylsilyl)-3,4-dihydro-1H-cyclopenta[c]oxepin-7(6H)-one (46f):**

The enantiomeric purity of compound **46f** was determined by SFC analysis run on a Chiralpak IC column using 5% MeOH as mobile phase with a 10 μL injection, a 3.0 mL/min flow rate and a pressure of 100 bars. The compound has 22% ee. The peaks are visualized at 220 nm, with the racemic alcohol (**±**)-**46f** exhibiting equal peaks with retention times of 3.6 and 3.9 minutes, and the enantioenriched compound **46f** exhibiting a major peak with a retention time of 3.9 minutes (minor enantiomer has a retention time of 3.6 minutes).



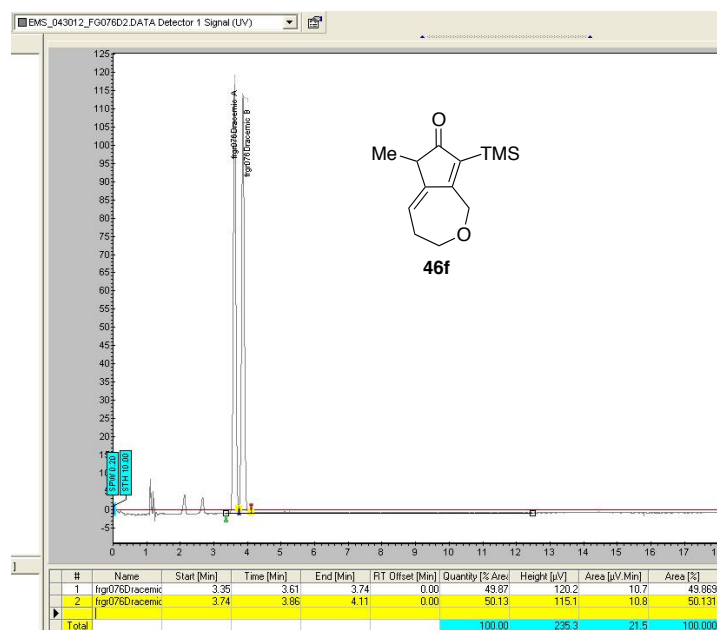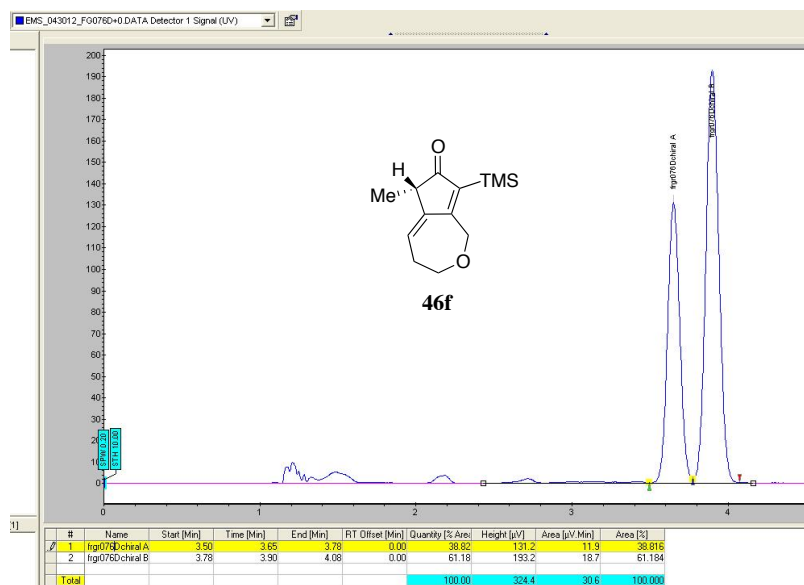

**(S)-6-methyl-8-phenyl-3,4-dihydro-1H-cyclopenta[c]oxepin-7(6H)-one (46d):**

The enantiomeric purity of compound **46d** was determined by HPLC analysis run on a ChiralCel OD column eluting in 5% 2-Propanol/Hexanes, with a 20.0  $\mu$ L injection and a 1.0 mL/min flow rate. Compound **46d** has 52% ee. The peaks are visualized at 254 nm, with the racemic compound ( $\pm$ )-**46d** exhibiting equal peaks with retention times of 9.1 and 12.4 minutes, and the enantioenriched compound **46d** exhibiting a major peak with a retention time of 12.3 minutes (minor enantiomer has a retention time of 9.1 minutes).

Values for the racemic compound :

| Ret.<br>Time<br>(min) | Time<br>Offset<br>(min) | Area<br>(counts) | Sep.<br>Code | Width<br>1/2<br>(sec) |
|-----------------------|-------------------------|------------------|--------------|-----------------------|
| 9.090                 | 0.000                   | 3725947          | BB           | 59.4                  |
| 12.373                | 0.000                   | 3798492          | BB           | 71.2                  |

Values for the enantiopur compound :

| Ret.<br>Time<br>(min) | Time<br>Offset<br>(min) | Area<br>(counts) | Sep.<br>Code | Width<br>1/2<br>(sec) |
|-----------------------|-------------------------|------------------|--------------|-----------------------|
| 9.085                 | 0.000                   | 1139357          | BB           | 49.1                  |
| 12.337                | 0.000                   | 3671502          | BB           | 66.2                  |

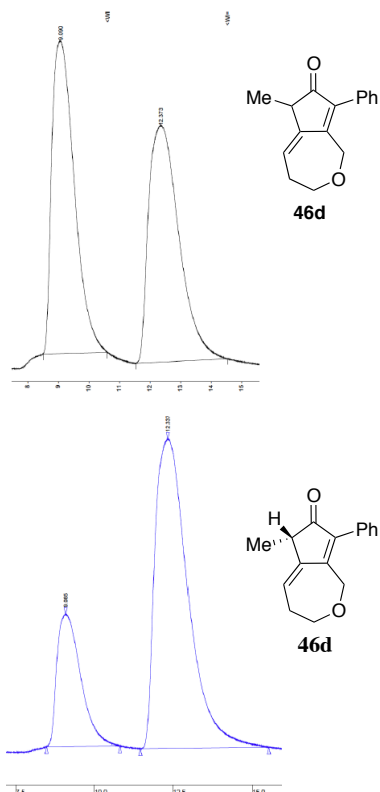

**(*R<sub>a</sub>*)-3-(dimethyl(phenyl)silyl)hexa-3,4-dien-1-ol (22):**

The enantiomeric purity of alcohol (*R<sub>a</sub>*)-**22** was determined<sup>2</sup> by HPLC analysis run on a Chiralpak IB-3 column eluting in 0.5% 2-Propanol/Hexanes, with a 2.0  $\mu$ L injection and a 1.0 mL/min flow rate. The alcohol has >93% ee. The peaks are visualized at 210 nm, with the racemic alcohol ( $\pm$ )-5 exhibiting equal peaks with retention times of 14.2 and 15.8 minutes, and the enantioenriched alcohol (*R<sub>a</sub>*)-**22** exhibiting a major peak with a retention time of 12.8 minutes (minor enantiomer has a retention time of 11.9 minutes).

<sup>2</sup> Enantiomeric excess determination for this compound was performed by Chiral Technologies Inc.

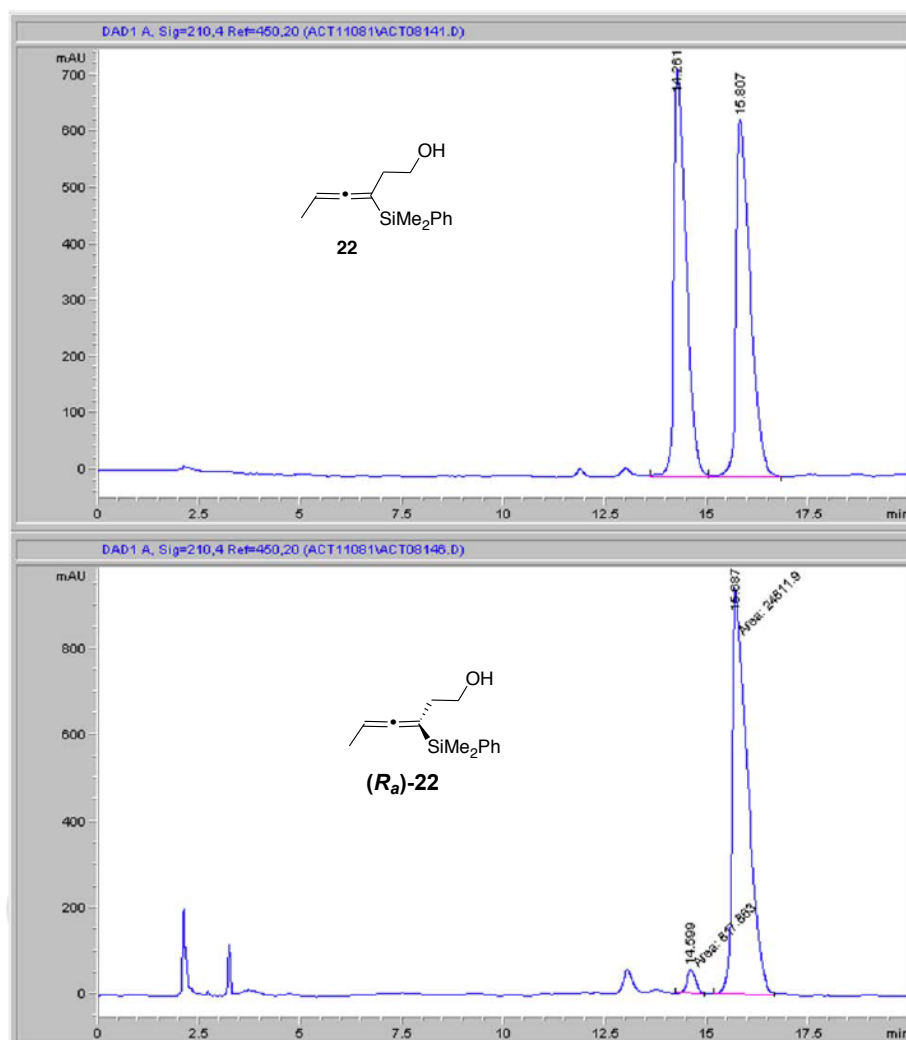

**(S)-5-(dimethyl(phenyl)silyl)-6,8-dimethyl-2-tosyl-1,2,3,4-tetrahydrocyclopenta[c]azepin-7(6H)-one (**35c**):**

The enantiomeric purity of compound **35c** was determined by HPLC analysis run on a ChiralCel OD column eluting in 10% 2-Propanol/Hexanes, with a 10.0  $\mu$ L injection and a 1.0 mL/min flow rate. Compound **35c** has >96% ee. The peaks are visualized at 254 nm, with the racemic compound ( $\pm$ )-**35c** exhibiting equal peaks with retention times of 11.9 and 17.2 minutes, and the enantioenriched

compound **35c** exhibiting a major peak with a retention time of 17.1 minutes  
(minor enantiomer has a retention time of 12.1 minutes).

Values for the racemic compound :

| Ret.<br>Time<br>(min) | Time<br>Offset<br>(min) | Area<br>(counts) | Sep.<br>Code | Width<br>1/2<br>(sec) |
|-----------------------|-------------------------|------------------|--------------|-----------------------|
| 11.868                | 0.000                   | 50556864         | BV           | 64.8                  |
| 17.267                | 0.000                   | 51547236         | VB           | 92.9                  |

Values for the enantiopur compound :

| Ret.<br>Time<br>(min) | Time<br>Offset<br>(min) | Area<br>(counts) | Sep.<br>Code | Width<br>1/2<br>(sec) |
|-----------------------|-------------------------|------------------|--------------|-----------------------|
| 12.077                | 0.000                   | 1779360          | BB           | 54.6                  |
| 17.073                | 0.000                   | 110018416        | BB           | 92.9                  |

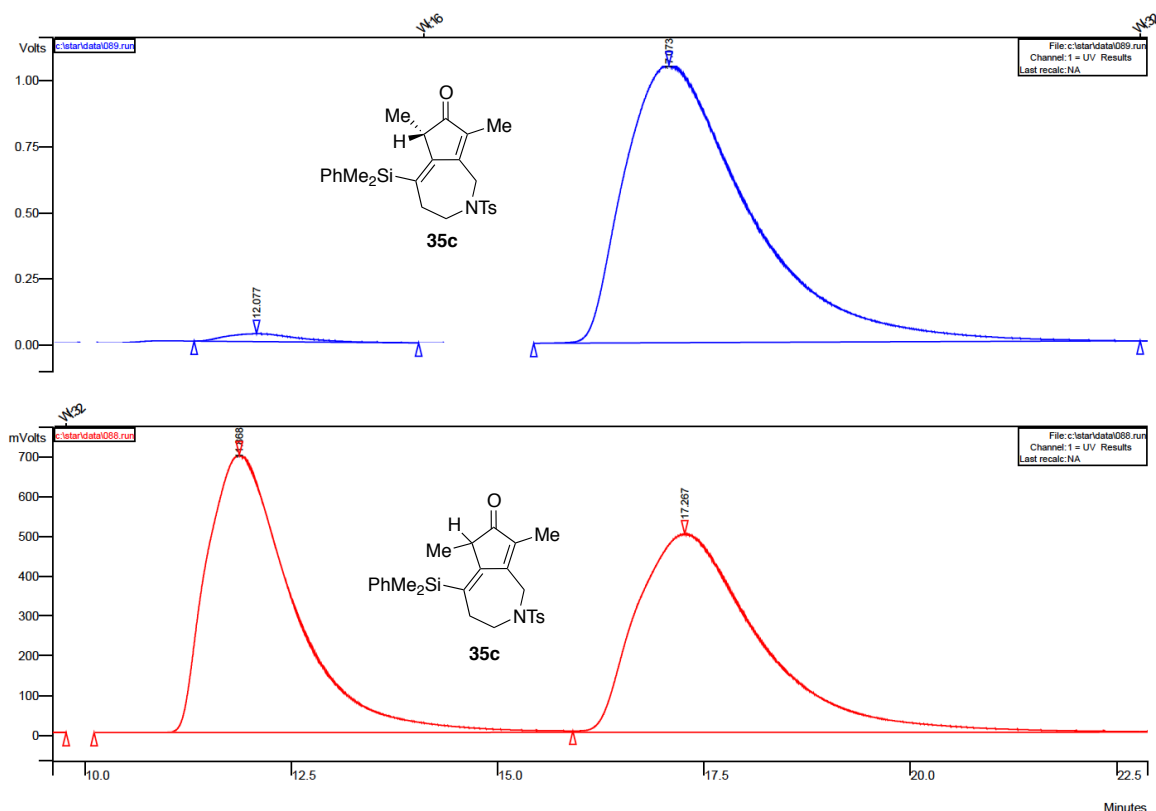

**(S)-5-(dimethyl(phenyl)silyl)-6-methyl-2-tosyl-1,2,3,4-tetrahydrocyclopenta  
[c]azepin-7(6H)-one (**35e**):**

The enantiomeric purity of compound **35e** was determined by HPLC analysis run on a ChiralCel OD column eluting in 10% 2-Propanol/Hexanes, with a 10.0  $\mu$ L injection and a 1.0 mL/min flow rate. Compound **35e** has >96% ee. The peaks are visualized at 254 nm, with the racemic compound ( $\pm$ )-**35e** exhibiting equal peaks with retention times of 26.6 and 32.1 minutes, and the enantioenriched compound **35e** exhibiting a major peak with a retention time of 26.5 minutes (minor enantiomer has a retention time of 33.3 minutes).

Values for the racemic compound :

| Ret.<br>Time<br>(min) | Time<br>Offset<br>(min) | Area<br>(counts) | Sep.<br>Code | Width<br>1/2<br>(sec) |
|-----------------------|-------------------------|------------------|--------------|-----------------------|
| 26.625                | 0.000                   | 26719278         | BV           | 143.4                 |
| 32.104                | 0.000                   | 26541100         | VB           | 187.8                 |

Values for the enantiopur compound :

| Ret.<br>Time<br>(min) | Time<br>Offset<br>(min) | Area<br>(counts) | Sep.<br>Code | Width<br>1/2<br>(sec) |
|-----------------------|-------------------------|------------------|--------------|-----------------------|
| 26.525                | 0.000                   | 70678656         | PB           | 142.9                 |
| 33.352                | 0.000                   | 1288559          | TS           | 0.0                   |

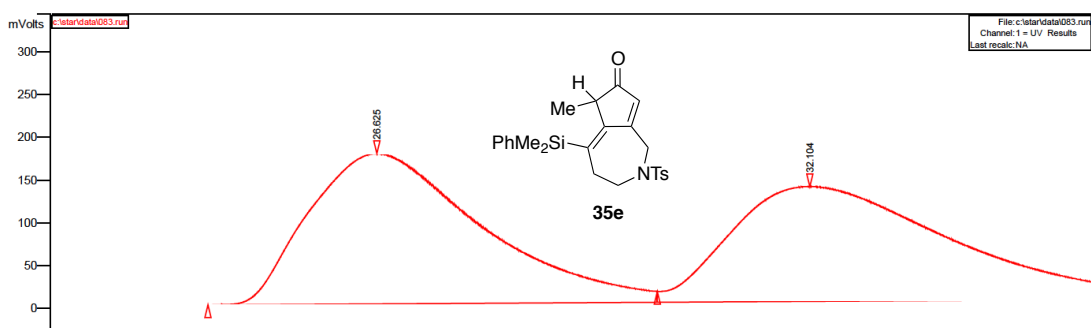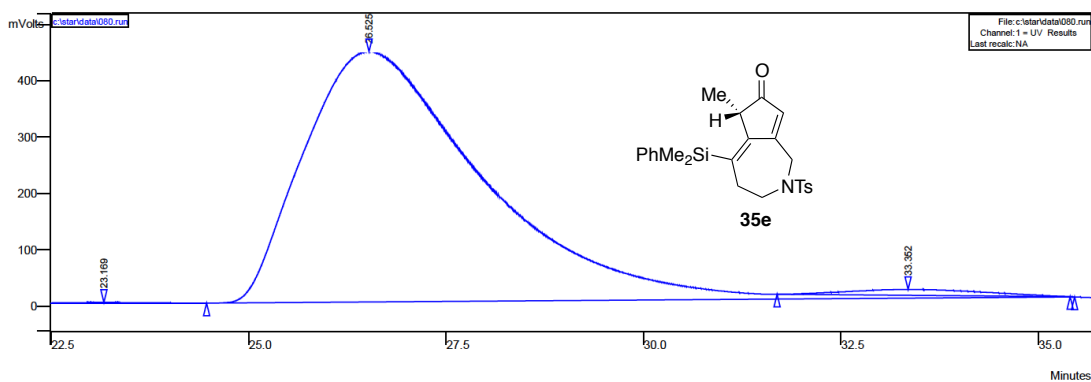

**(S)-5-(dimethyl(phenyl)silyl)-6-methyl-2-tosyl-8-(trimethylsilyl)-1,2,3,4-tetrahydrocyclopenta[c]azepin-7(6H)-one (35f):**

The enantiomeric purity of compound **35f** was determined by HPLC analysis run on a ChiralCel OD column eluting in 10% 2-Propanol/Hexanes, with a 10.0 µL injection and a 1.0 mL/min flow rate. Compound **35f** has >97% ee. The peaks are visualized at 254 nm, with the racemic compound (+)-**35f** exhibiting equal peaks with retention times of 7.9 and 15.1 minutes, and the enantioenriched compound **35f** exhibiting a major peak with a retention time of 15.0 minutes (minor enantiomer has a retention time of 12.9 minutes).

Values for the racemic compound :

| Ret.<br>Time<br>(min) | Time<br>Offset<br>(min) | Area<br>(counts) | Sep.<br>Code | Width<br>1/2<br>(sec) |
|-----------------------|-------------------------|------------------|--------------|-----------------------|
| 7.956                 | 0.000                   | 41519064         | BB           | 42.9                  |
| 15.094                | 0.000                   | 42309972         | BB           | 81.9                  |

Values for the enantiopur compound :

| Ret.<br>Time<br>(min) | Time<br>Offset<br>(min) | Area<br>(counts) | Sep.<br>Code | Width<br>1/2<br>(sec) |
|-----------------------|-------------------------|------------------|--------------|-----------------------|
| 8.045                 | 0.000                   | 910668           | BB           | 41.9                  |
| 15.002                | 0.000                   | 77515120         | VB           | 84.9                  |



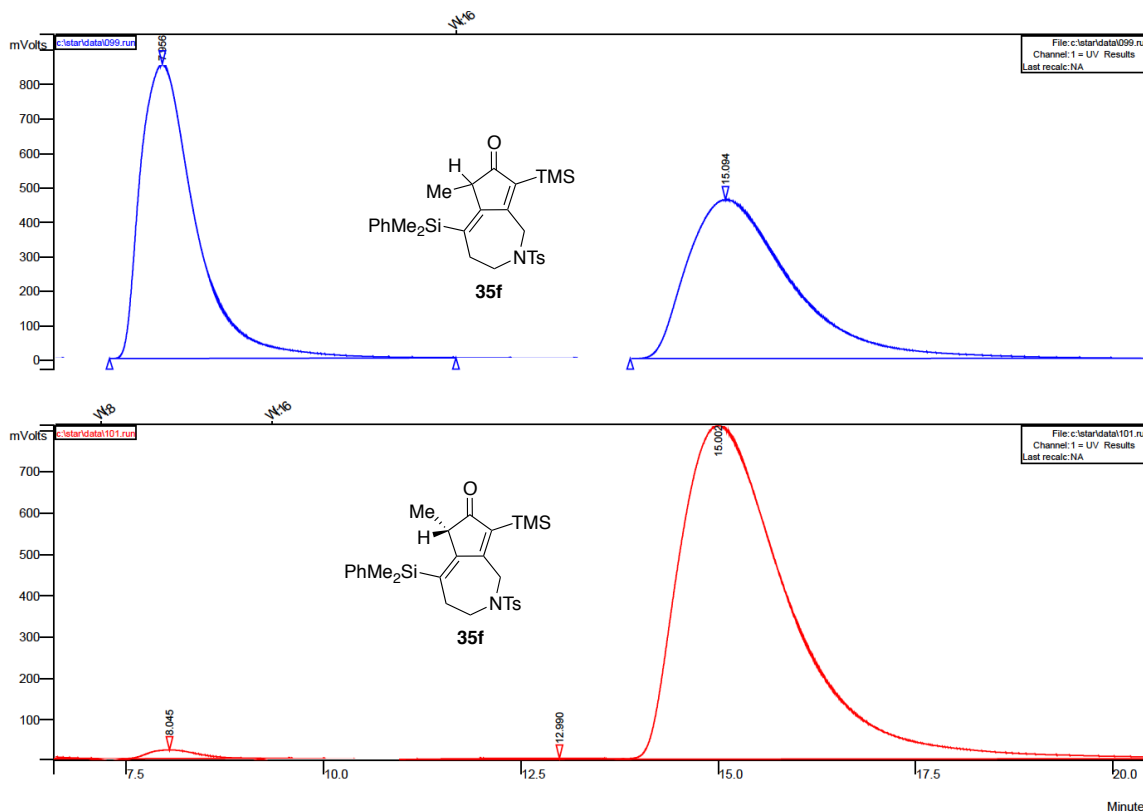

**(S)-5-(dimethyl(phenyl)silyl)-6-methyl-8-phenyl-2-tosyl-1,2,3,4-tetrahydrocyclopenta[c]azepin-7(6H)-one (**35d**):**

The enantiomeric purity of compound **35d** was determined by HPLC analysis run on a ChiralCel OD column eluting in 10% 2-Propanol/Hexanes, with a 10.0  $\mu$ L injection and a 1.0 mL/min flow rate. Compound **35d** has >96% ee. The peaks are visualized at 254 nm, with the racemic compound ( $\pm$ )-**35d** exhibiting equal peaks with retention times of 15.4 and 24.1 minutes, and the enantioenriched compound **35d** exhibiting a major peak with a retention time of 24.2 minutes (minor enantiomer has a retention time of 16.1 minutes).

Values for the racemic compound :

| Ret.<br>Time<br>(min) | Time<br>Offset<br>(min) | Area<br>(counts) | Sep.<br>Code | Width<br>1/2<br>(sec) |
|-----------------------|-------------------------|------------------|--------------|-----------------------|
| 15.426                | 0.000                   | 47444380         | BB           | 90.0                  |
| 24.122                | 0.000                   | 47988480         | BB           | 135.7                 |

Values for the enantiopur compound :

| Ret.<br>Time<br>(min) | Time<br>Offset<br>(min) | Area<br>(counts) | Sep.<br>Code | Width<br>1/2<br>(sec) |
|-----------------------|-------------------------|------------------|--------------|-----------------------|
| 16.077                | 0.000                   | 933022           | BB           | 87.8                  |
| 24.209                | 0.000                   | 59857904         | BB           | 137.3                 |

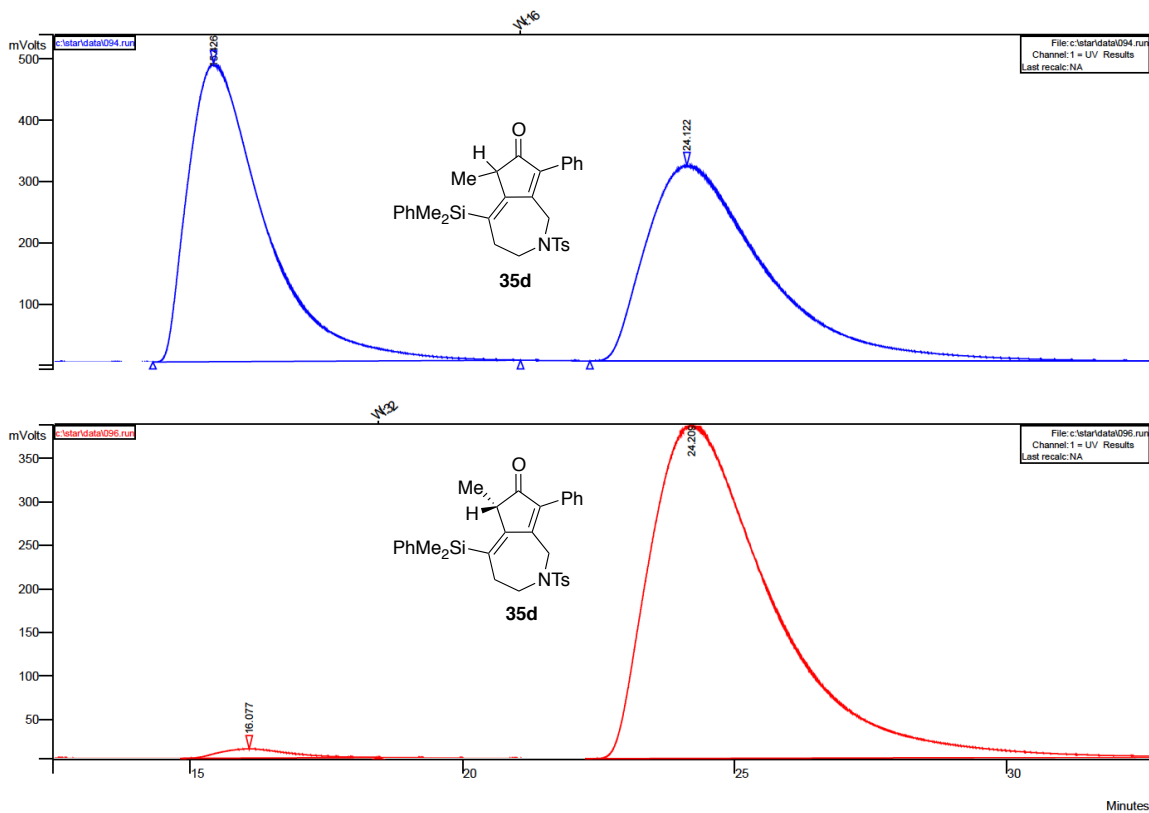

**(S)-5-(dimethyl(phenyl)silyl)-6-methyl-8-(thiophen-3-yl)-2-tosyl-1,2,3,4-tetrahydrocyclopenta[c]azepin-7(6H)-one (35a):**

The enantiomeric purity of compound **35a** was determined by HPLC analysis run on a ChiralCel OD column eluting in 10% 2-Propanol/Hexanes, with a 10.0 µL injection and a 1.0 mL/min flow rate. Compound **35a** has >95% ee. The peaks are visualized at 254 nm, with the racemic compound (+)-**35a** exhibiting equal peaks with retention times of 20.4 and 30.7 minutes, and the enantioenriched compound **35a** exhibiting a major peak with a retention time of 31.6 minutes (minor enantiomer has a retention time of 21.0 minutes).

Values for the racemic compound :

| Ret.<br>Time<br>(min) | Time<br>Offset<br>(min) | Area<br>(counts) | Sep.<br>Code | Width<br>1/2<br>(sec) |
|-----------------------|-------------------------|------------------|--------------|-----------------------|
| 20.437                | 0.000                   | 5860423          | BB           | 133.8                 |
| 30.767                | 0.000                   | 7204155          | BB           | 182.5                 |

Values for the enantiopur compound :

| Ret.<br>Time<br>(min) | Time<br>Offset<br>(min) | Area<br>(counts) | Sep.<br>Code | Width<br>1/2<br>(sec) |
|-----------------------|-------------------------|------------------|--------------|-----------------------|
| 21.056                | 0.000                   | 440955           | BB           | 118.9                 |
| 31.603                | 0.000                   | 20019798         | BB           | 189.6                 |

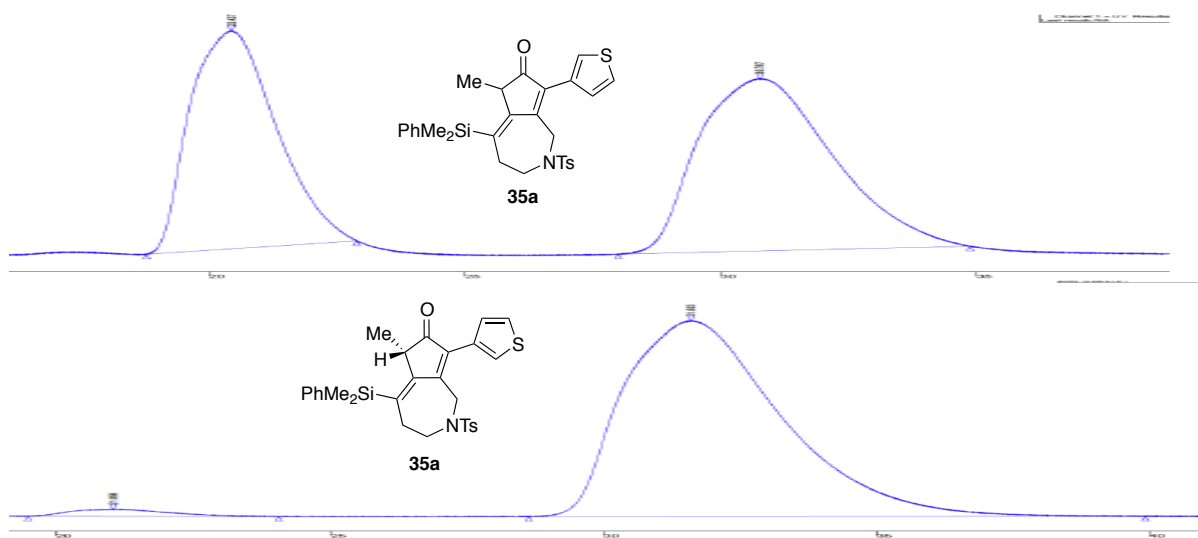

**(S)-5-(dimethyl(phenyl)silyl)-6-methyl-8-(thiophen-2-yl)-2-tosyl-1,2,3,4-tetrahydrocyclopenta[c]azepin-7(6H)-one (**35b**):**

The HPLC analysis run on a ChiralCel OD column eluting in 10% 2-Propanol/Hexanes, with a 10.0  $\mu$ L injection and a 1.0 mL/min flow rate. Compound **35b** has >95% ee. The peaks are visualized at 254 nm, with the racemic compound (+)-**35b** exhibiting equal peaks with retention times of 20.6 and 28.6 minutes, and the enantioenriched compound **35b** exhibiting a major peak with a retention time of 27.5 minutes. The minor enantiomer was not detected (the corresponding peak was below the detection level of the HPLC system).

Values for the racemic compound :

| Ret.<br>Time<br>(min) | Time<br>Offset<br>(min) | Area<br>(counts) | Sep.<br>Code | Width<br>1/2<br>(sec) |
|-----------------------|-------------------------|------------------|--------------|-----------------------|
| 20.567                | 0.000                   | 5495031          | BB           | 108.7                 |
| 28.555                | 0.000                   | 5347258          | BB           | 162.4                 |

Values for the enantiopur compound :

| Ret.<br>Time<br>(min) | Time<br>Offset<br>(min) | Area<br>(counts) | Sep.<br>Code | Width<br>1/2<br>(sec) |
|-----------------------|-------------------------|------------------|--------------|-----------------------|
| 27.517                | 0.000                   | 10836925         | BB           | 172.1                 |

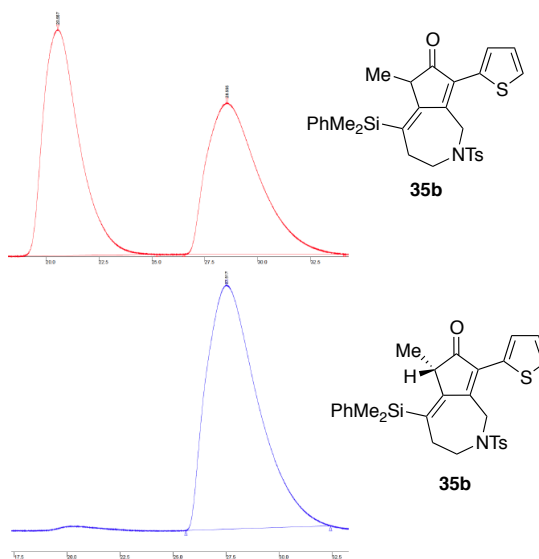

**(S)-8-cyclopropyl-5-(dimethyl(phenyl)silyl)-6-methyl-2-tosyl-1,2,3,4-tetrahydrocyclopenta[c]azepin-7(6H)-one (35g):**

The HPLC analysis run on a ChiralCel OD column eluting in 5% 2-Propanol/Hexanes, with a 10.0 µL injection and a 1.0 mL/min flow rate. Compound **35g** has >99% ee. The peaks are visualized at 254 nm, with the racemic compound (+)-**35g** exhibiting equal peaks with retention times of 14.5 and 23.8 minutes, and the enantioenriched compound **35g** exhibiting a major peak with a retention time of 23.3 minutes (the minor enantiomer was not detected).

Values for the racemic compound :

| Ret.<br>Time<br>(min) | Time<br>Offset<br>(min) | Area<br>(counts) | Sep.<br>Code | Width<br>1/2<br>(sec) |
|-----------------------|-------------------------|------------------|--------------|-----------------------|
| 14.533                | 0.000                   | 6606343          | BB           | 64.4                  |
| 23.847                | 0.000                   | 7006123          | BB           | 97.3                  |

Values for the enantiopur compound :

| Ret.<br>Time<br>(min) | Time<br>Offset<br>(min) | Area<br>(counts) | Sep.<br>Code | Width<br>1/2<br>(sec) |
|-----------------------|-------------------------|------------------|--------------|-----------------------|
| 23.349                | 0.000                   | 12560960         | BB           | 99.4                  |

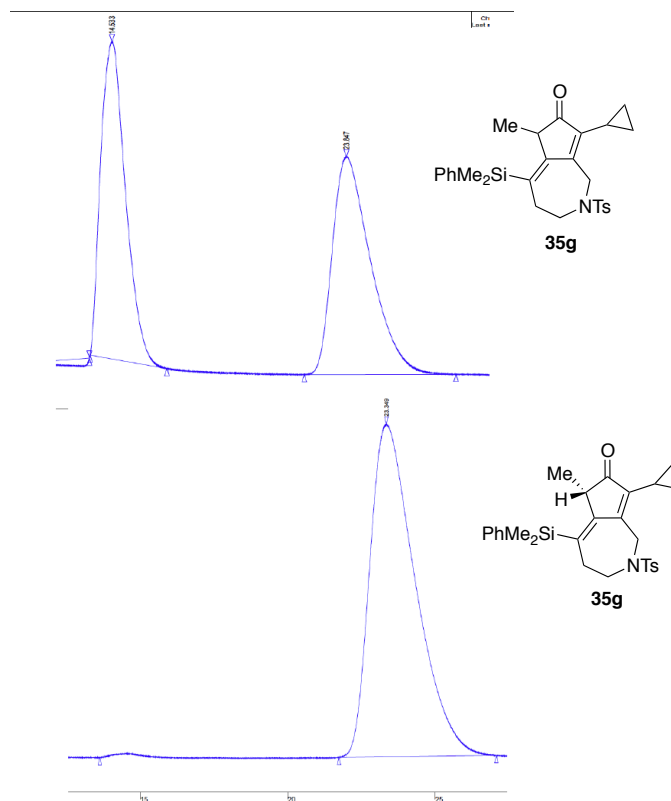

**(*R<sub>a</sub>*)-3-(2-phenylvinylidene)heptan-1-ol (29):**

The enantiomeric purity of compound (*R<sub>a</sub>*)-**29** was determined by HPLC analysis run on a ChiralCel OD column eluting in 3% 2-Propanol/Hexanes, with a 20.0  $\mu$ L injection and a 1.0 mL/min flow rate. Compound (*R<sub>a</sub>*)-**29** has >79% ee. The peaks are visualized at 254 nm, with the racemic compound ( $\pm$ )-**29** exhibiting equal peaks with retention times of 8.4 and 14.2 minutes, and the enantioenriched compound (*R<sub>a</sub>*)-**29** exhibiting a major peak with a retention time of 14.3 minutes (minor enantiomer has a retention time of 8.4 minutes).

Values for the racemic compound :

| Ret.<br>Time<br>(min) | Time<br>Offset<br>(min) | Area<br>(counts) | Sep.<br>Code | Width<br>1/2<br>(sec) |
|-----------------------|-------------------------|------------------|--------------|-----------------------|
| 8.410                 | 0.000                   | 28599070         | VB           | 28.2                  |
| 14.169                | 0.000                   | 28686952         | BB           | 49.0                  |

Values for the enantiopur compound :

| Ret.<br>Time<br>(min) | Time<br>Offset<br>(min) | Area<br>(counts) | Sep.<br>Code | Width<br>1/2<br>(sec) |
|-----------------------|-------------------------|------------------|--------------|-----------------------|
| 8.378                 | 0.000                   | 6736711          | VB           | 29.0                  |
| 14.344                | 0.000                   | 58590084         | BB           | 51.8                  |

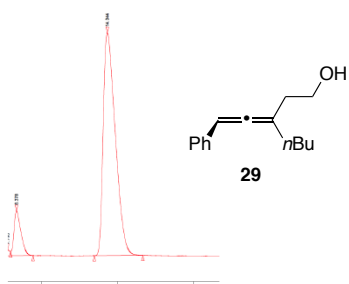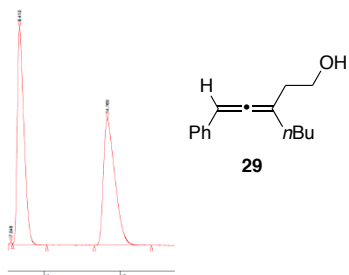

**(S)-6-methyl-8-phenyl-2-tosyl-1,2,3,4-tetrahydrocyclopenta[c]azepin-7(6H)-one (42d):**

The enantiomeric purity of compound **42d** was determined by HPLC analysis run on a ChiralCel OD column eluting in 10% 2-Propanol/Hexanes, with a 20.0  $\mu$ L



injection and a 1.0 mL/min flow rate. Compound **42d** has 79% ee. The peaks are visualized at 254 nm, with the racemic compound ( $\pm$ )-**42d** exhibiting equal peaks with retention times of 16.7 and 45.9 minutes, and the enantioenriched compound **42d** exhibiting a major peak with a retention time of 38.8 minutes (minor enantiomer has a retention time of 15.8 minutes).

Values for the racemic compound :

| Ret.<br>Time<br>(min) | Time<br>Offset<br>(min) | Area<br>(counts) | Sep.<br>Code | Width<br>1/2<br>(sec) |
|-----------------------|-------------------------|------------------|--------------|-----------------------|
| 16.771                | 0.000                   | 9215916          | BB           | 98.1                  |
| 45.896                | 0.000                   | 9185056          | BB           | 267.8                 |

Values for the enantiopur compound :

| Ret.<br>Time<br>(min) | Time<br>Offset<br>(min) | Area<br>(counts) | Sep.<br>Code | Width<br>1/2<br>(sec) |
|-----------------------|-------------------------|------------------|--------------|-----------------------|
| 15.775                | 0.000                   | 1028565          | BB           | 64.8                  |
| 38.752                | 0.000                   | 9044723          | BB           | 184.8                 |

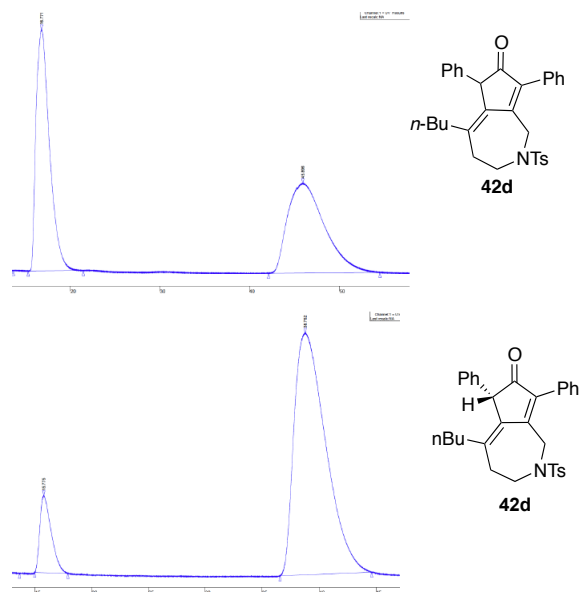

**(S)-5-butyl-8-methyl-6-phenyl-2-tosyl-1,2,3,4-tetrahydrocyclopenta[c]azepin-7(6H)-one (42c):**

The enantiomeric purity of compound **42c** was determined by HPLC analysis run on a ChiralCel OD column eluting in 7% 2-Propanol/Hexanes, with a 20.0  $\mu$ L injection and a 1.0 mL/min flow rate. Compound **42c** has 74% ee. The peaks are visualized at 254 nm, with the racemic compound (+)-**42c** exhibiting equal peaks with retention times of 17.0 and 26.8 minutes, and the enantioenriched compound **42c** exhibiting a major peak with a retention time of 23.7 minutes (minor enantiomer has a retention time of 15.9 minutes).

Values for the racemic compound :

| Ret.<br>Time<br>(min) | Time<br>Offset<br>(min) | Area<br>(counts) | Sep.<br>Code | Width<br>1/2<br>(sec) |
|-----------------------|-------------------------|------------------|--------------|-----------------------|
| 17.011                | 0.000                   | 3744275          | BB           | 94.4                  |
| 26.810                | 0.000                   | 3655357          | BB           | 150.1                 |

Values for the enantiopur compound :

| Ret.<br>Time<br>(min) | Time<br>Offset<br>(min) | Area<br>(counts) | Sep.<br>Code | Width<br>1/2<br>(sec) |
|-----------------------|-------------------------|------------------|--------------|-----------------------|
| 15.905                | 0.000                   | 1077742          | BB           | 62.4                  |
| 23.770                | 0.000                   | 7160657          | BB           | 107.9                 |

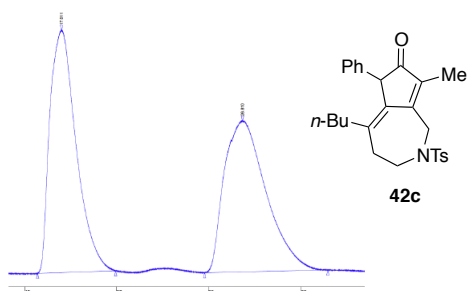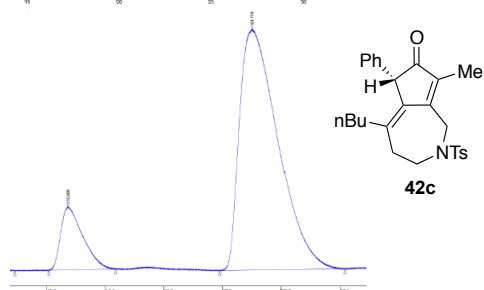

**(S)-5-butyl-6-phenyl-2-tosyl-8-(trimethylsilyl)-1,2,3,4-tetrahydrocyclopenta  
[c]azepin-7(6H)-one (42f):**

The enantiomeric purity of compound **42f** was determined by HPLC analysis run on a ChiralCel OD column eluting in 0.5% 2-Propanol/Hexanes, with a 20.0 µL injection and a 1.0 mL/min flow rate. Compound **42f** has 79% ee. The peaks are visualized at 254 nm, with the racemic compound (+)-**42f** exhibiting equal peaks with retention times of 41.6 and 51.9 minutes, and the enantioenriched compound **42f** exhibiting a major peak with a retention time of 54.5 minutes (minor enantiomer has a retention time of 45.9 minutes).

Values for the racemic compound :

| Ret.<br>Time<br>(min) | Time<br>Offset<br>(min) | Area<br>(counts) | Sep.<br>Code | Width<br>1/2<br>(sec) |
|-----------------------|-------------------------|------------------|--------------|-----------------------|
| 41.567                | 0.000                   | 16292488         | BB           | 273.9                 |
| 51.935                | 0.000                   | 15671646         | BB           | 333.8                 |

Values for the enantiopur compound :

| Ret.<br>Time<br>(min) | Time<br>Offset<br>(min) | Area<br>(counts) | Sep.<br>Code | Width<br>1/2<br>(sec) |
|-----------------------|-------------------------|------------------|--------------|-----------------------|
| 45.955                | 0.000                   | 3626320          | BV           | 318.9                 |
| 54.530                | 0.000                   | 31692996         | VB           | 448.8                 |

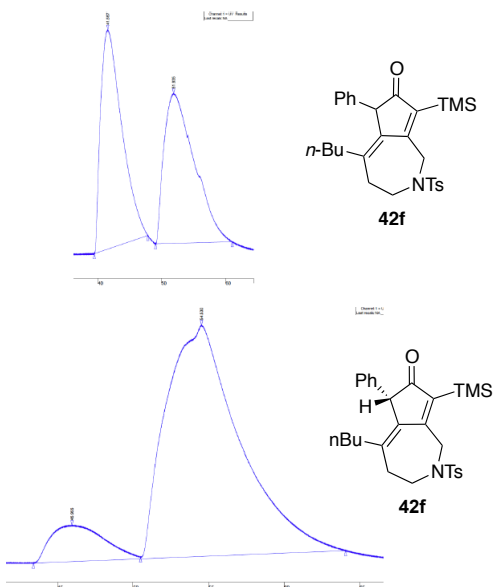

**(S)-diethyl 8-butyl-2-oxo-1,3-diphenyl-1,2,6,7-tetrahydroazulene-5,5(4H)-dicarboxylate (**44d**):**

The enantiomeric purity of compound **44d** was determined by HPLC analysis run on a ChiralCel OD column eluting in 5% 2-Propanol/Hexanes, with a 20.0  $\mu$ L injection and a 1.0 mL/min flow rate. Compound **44d** has 76% ee. The peaks are visualized at 254 nm, with the racemic compound (+)-**44d** exhibiting equal peaks with retention times of 7.5 and 16.5 minutes, and the enantioenriched compound **44d** exhibiting a major peak with a retention time of 16.5 minutes (minor enantiomer has a retention time of 7.5 minutes).

Values for the racemic compound :

| Ret.<br>Time<br>(min) | Time<br>Offset<br>(min) | Area<br>(counts) | Sep.<br>Code | Width<br>1/2<br>(sec) |
|-----------------------|-------------------------|------------------|--------------|-----------------------|
| 7.515                 | 0.000                   | 4039989          | PB           | 28.3                  |
| 16.515                | 0.000                   | 4255920          | BB           | 63.2                  |

Values for the enantiopur compound :

| Ret.<br>Time<br>(min) | Time<br>Offset<br>(min) | Area<br>(counts) | Sep.<br>Code | Width<br>1/2<br>(sec) |
|-----------------------|-------------------------|------------------|--------------|-----------------------|
| 7.533                 | 0.000                   | 2921670          | BB           | 28.8                  |
| 16.551                | 0.000                   | 21481534         | BB           | 69.9                  |

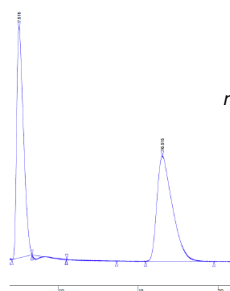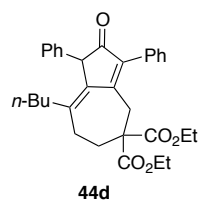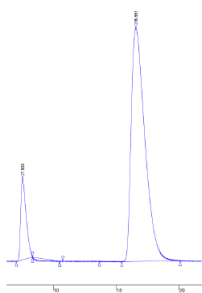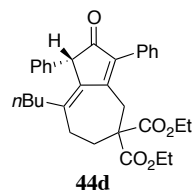

**(S)-diethyl 8-butyl-2-oxo-1-phenyl-3-(trimethylsilyl)-1,2,6,7-tetrahydro  
azulene-5,5(4H)-dicarboxylate (44f):**

The enantiomeric purity of compound **44f** was determined by HPLC analysis run on a ChiralCel IA-3 column eluting in 3% 2-Propanol/Hexanes, with a 20.0  $\mu$ L injection and a 1.0 mL/min flow rate. Compound **44f** has 76% ee. The peaks are visualized at 254 nm, with the racemic compound (+)-**44f** exhibiting equal peaks with retention times of 5.7 and 7.1 minutes, and the enantioenriched compound **44f** exhibiting a major peak with a retention time of 7.2 minutes (minor enantiomer has a retention time of 5.9 minutes).

Values for the racemic compound :

| Ret.<br>Time<br>(min) | Time<br>Offset<br>(min) | Area<br>(counts) | Sep.<br>Code | Width<br>1/2<br>(sec) |
|-----------------------|-------------------------|------------------|--------------|-----------------------|
| 5.711                 | 0.000                   | 6012605          | BB           | 6.1                   |
| 7.122                 | 0.000                   | 5773154          | BB           | 6.9                   |

Values for the enantiopur compound :

| Ret.<br>Time<br>(min) | Time<br>Offset<br>(min) | Area<br>(counts) | Sep.<br>Code | Width<br>1/2<br>(sec) |
|-----------------------|-------------------------|------------------|--------------|-----------------------|
| 5.965                 | 0.000                   | 1537564          | BB           | 4.3                   |
| 7.201                 | 0.000                   | 11192721         | BB           | 8.1                   |

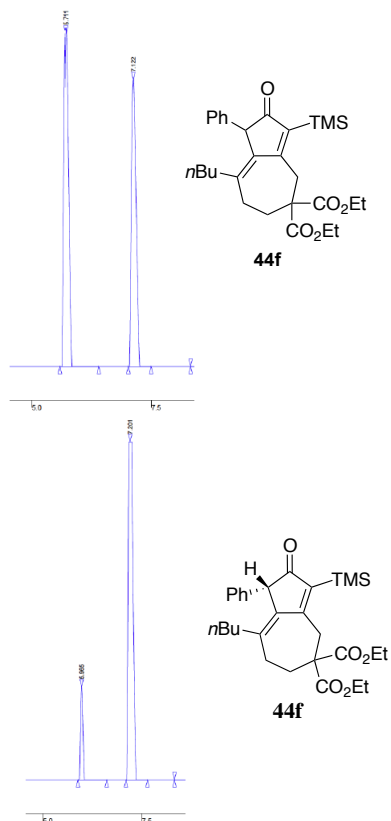

**(S)-diethyl 8-butyl-3-methyl-2-oxo-1-phenyl-1,2,6,7-tetrahydroazulene-5,5(4H)-dicarboxylate (**44c**):**

The enantiomeric purity of compound **44c** was determined by HPLC analysis run on a ChiralCel IA-3 column eluting in 3% 2-Propanol/Hexanes, with a 20.0  $\mu$ L injection and a 1.0 mL/min flow rate. Compound **44c** has 80% ee. The peaks are visualized at 254 nm, with the racemic compound (**±**)-**44c** exhibiting equal peaks with retention times of 12.7 and 14.4 minutes, and the enantioenriched compound **44c** exhibiting a major peak with a retention time of 14.2 minutes (minor enantiomer has a retention time of 12.7 minutes).



Values for the racemic compound :

| Ret.<br>Time<br>(min) | Time<br>Offset<br>(min) | Area<br>(counts) | Sep.<br>Code | Width<br>1/2<br>(sec) |
|-----------------------|-------------------------|------------------|--------------|-----------------------|
| 12.656                | 0.000                   | 15581800         | BB           | 13.3                  |
| 14.423                | 0.000                   | 13541313         | BB           | 22.2                  |

Values for the enantiopur compound :

| Ret.<br>Time<br>(min) | Time<br>Offset<br>(min) | Area<br>(counts) | Sep.<br>Code | Width<br>1/2<br>(sec) |
|-----------------------|-------------------------|------------------|--------------|-----------------------|
| 12.716                | 0.000                   | 3731294          | BB           | 10.6                  |
| 14.198                | 0.000                   | 34908856         | BB           | 32.3                  |

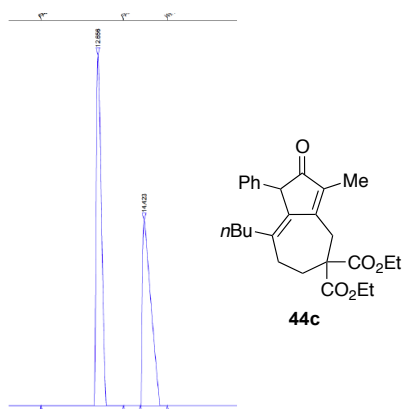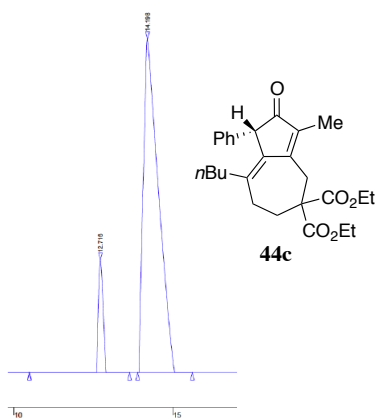

**(S)-5-butyl-6,8-diphenyl-3,4-dihydro-1*H*-cyclopenta[*c*]oxepin-7(6*H*)-one  
(43d).**

The enantiomeric purity of compound **43d** was determined by HPLC analysis run on a ChiralCel OD column eluting in 5% 2-Propanol/Hexanes, with a 20.0 µL injection and a 1.0 mL/min flow rate. Compound **43d** has 77% ee. The peaks are visualized at 254 nm, with the racemic compound (*±*)-**43d** exhibiting equal peaks with retention times of 7.9 and 22.7 minutes, and the enantioenriched compound **43d** exhibiting a major peak with a retention time of 22.2 minutes (minor enantiomer has a retention time of 7.9 minutes).

Values for the racemic compound :

| Ret.<br>Time<br>(min) | Time<br>Offset<br>(min) | Area<br>(counts) | Sep.<br>Code | Width<br>1/2<br>(sec) |
|-----------------------|-------------------------|------------------|--------------|-----------------------|
| 7.993                 | 0.000                   | 6590507          | BB           | 30.0                  |
| 22.700                | 0.000                   | 6522174          | BB           | 88.8                  |

Values for the enantiopur compound :

| Ret.<br>Time<br>(min) | Time<br>Offset<br>(min) | Area<br>(counts) | Sep.<br>Code | Width<br>1/2<br>(sec) |
|-----------------------|-------------------------|------------------|--------------|-----------------------|
| 7.886                 | 0.000                   | 2422351          | BB           | 29.4                  |
| 22.239                | 0.000                   | 18274828         | BB           | 86.4                  |

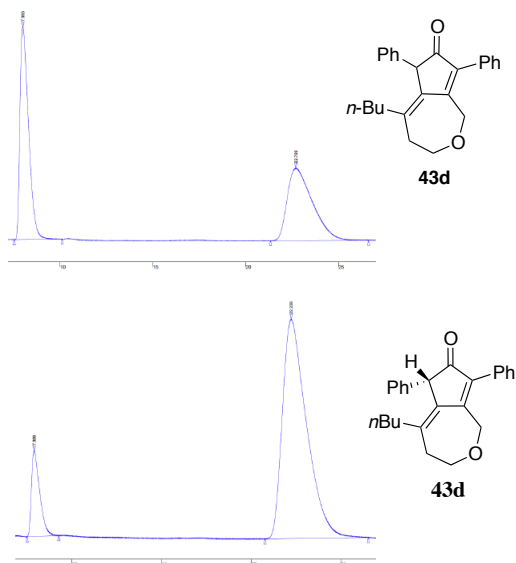

**(S)-5-butyl-8-methyl-6-phenyl-3,4-dihydro-1H-cyclopenta[c]oxepin-7(6H)-one (**43c**):**

The enantiomeric purity of compound **43c** was determined by HPLC analysis run on a ChiralCel OD column eluting in 2% 2-Propanol/Hexanes, with a 20.0  $\mu$ L injection and a 1.0 mL/min flow rate. Compound **43c** has 78% ee. The peaks are visualized at 254 nm, with the racemic compound ( $\pm$ )-**43c** exhibiting equal peaks with retention times of 8.7 and 15.7 minutes, and the enantioenriched compound **43c** exhibiting a major peak with a retention time of 15.6 minutes (minor enantiomer has a retention time of 8.7 minutes).

Values for the racemic compound :

| Ret.<br>Time<br>(min) | Time<br>Offset<br>(min) | Area<br>(counts) | Sep.<br>Code | Width<br>1/2<br>(sec) |
|-----------------------|-------------------------|------------------|--------------|-----------------------|
| 8.721                 | 0.000                   | 5070164          | BB           | 37.7                  |
| 15.774                | 0.000                   | 5470080          | BB           | 71.1                  |

Values for the enantiopur compound :

| Ret.<br>Time<br>(min) | Time<br>Offset<br>(min) | Area<br>(counts) | Sep.<br>Code | Width<br>1/2<br>(sec) |
|-----------------------|-------------------------|------------------|--------------|-----------------------|
| 8.699                 | 0.000                   | 569848           | BB           | 35.6                  |
| 15.563                | 0.000                   | 4521015          | BB           | 69.7                  |

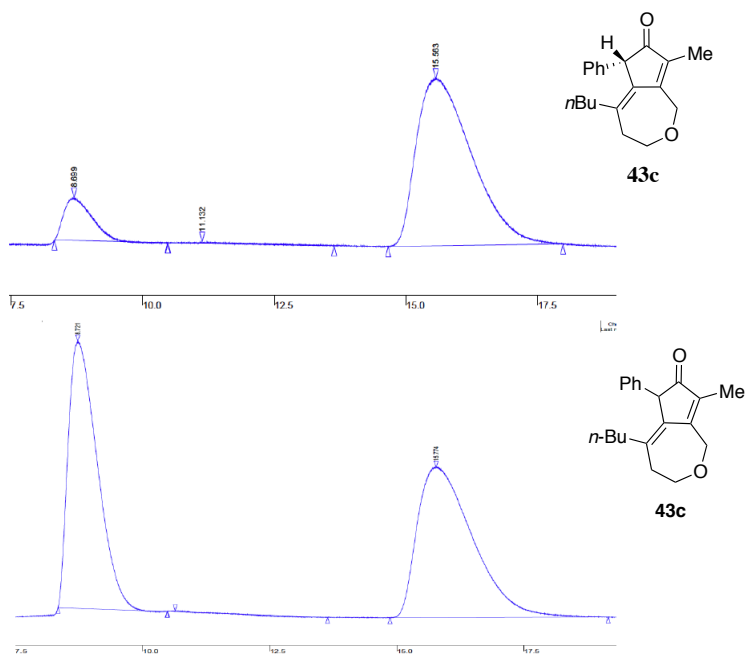

**(S)-5-butyl-6-phenyl-8-(trimethylsilyl)-3,4-dihydro-1H-cyclopenta[c]oxepin-7(6H)-one (43f):**

The enantiomeric purity of compound **43f** was determined by SFC analysis run on a Chiralpak IC column using 10% MeOH as mobile phase with a 10  $\mu$ L injection, a 3.0 mL/min flow rate and a pressure of 110 bar. The compound has 77% ee. The peaks are visualized at 220 nm, with the racemic alcohol (+)-**43f** exhibiting equal peaks with retention times of 3.1 and 3.8 minutes, and the enantioenriched compound **43f** exhibiting a major peak with a retention time of 3.7 minutes (minor enantiomer has a retention time of 3.1 minutes).

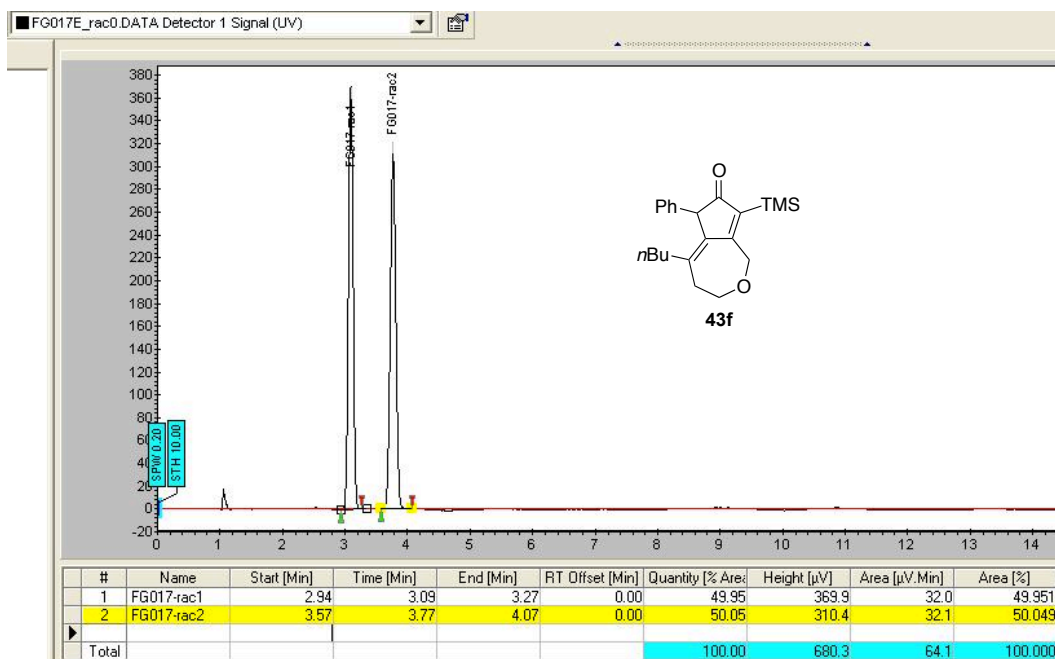

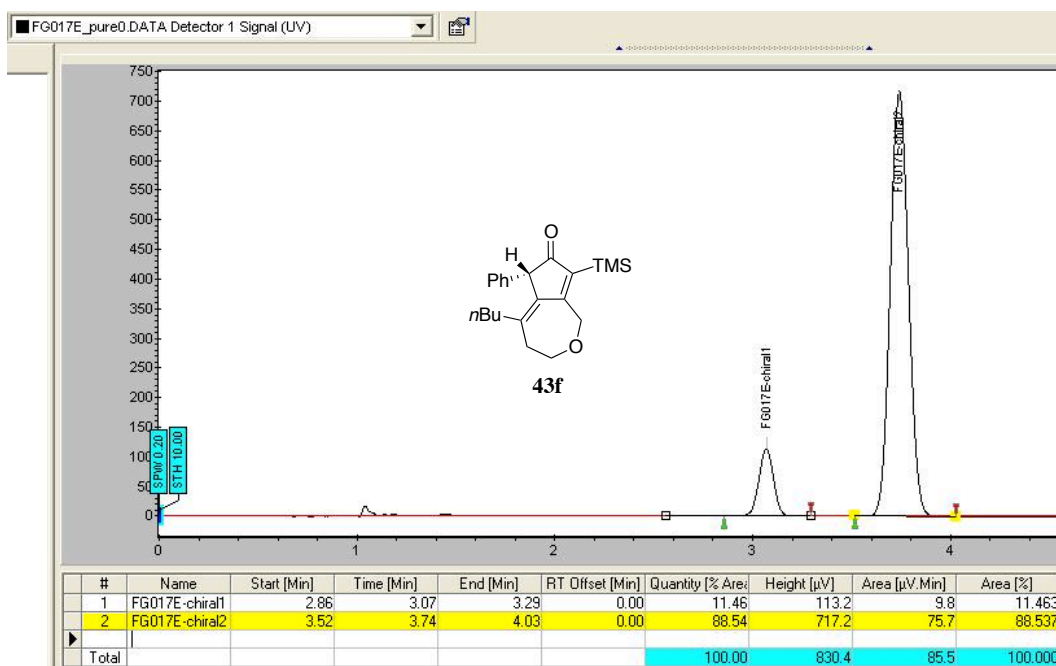

**(S)-5-butyl-8-cyclopropyl-6-phenyl-2-tosyl-1,2,3,4-tetrahydrocyclopenta[c]azepin-7(6H)-one (42g):**

The enantiomeric purity of compound **42g** was determined by HPLC analysis run on a ChiralCel OD column eluting in 5% 2-Propanol/Hexanes, with a 10.0 μL injection and a 1.0 mL/min flow rate. Compound **42g** has 79% ee. The peaks are visualized at 254 nm, with the racemic compound (+)-**42g** exhibiting equal peaks with retention times of 15.2 and 21.4 minutes, and the enantioenriched compound **42g** exhibiting a major peak with a retention time of 21.5 minutes (minor enantiomer has a retention time of 15.5 minutes).

Values for the racemic compound :

| Ret.<br>Time<br>(min) | Time<br>Offset<br>(min) | Area<br>(counts) | Sep.<br>Code | Width<br>1/2<br>(sec) |
|-----------------------|-------------------------|------------------|--------------|-----------------------|
| 15.228                | 0.000                   | 5343053          | BB           | 63.8                  |
| 21.368                | 0.000                   | 5377441          | BB           | 98.8                  |

Values for the enantiopur compound :

| Ret.<br>Time<br>(min) | Time<br>Offset<br>(min) | Area<br>(counts) | Sep.<br>Code | Width<br>1/2<br>(sec) |
|-----------------------|-------------------------|------------------|--------------|-----------------------|
| 15.530                | 0.000                   | 888939           | BB           | 63.7                  |
| 21.452                | 0.000                   | 7508335          | BB           | 99.9                  |

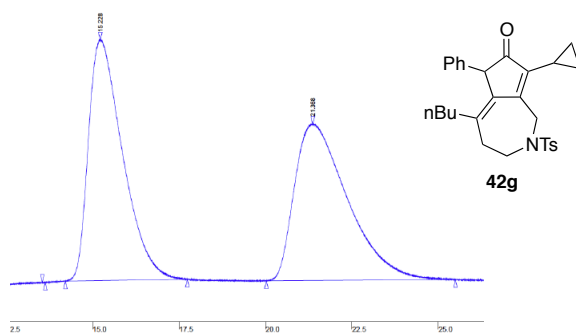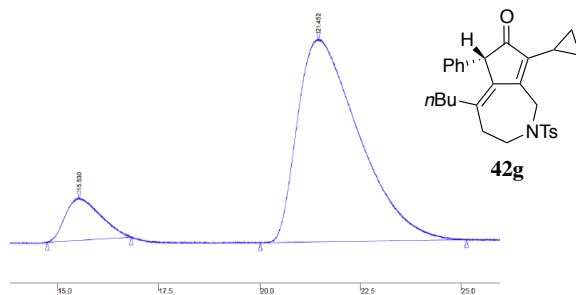

## HPLC analysis for the racemization experiment in the disubstituted series

### - For (*R<sub>a</sub>*)-(3-(hexa-3,4-dien-1-yloxy)prop-1-yn-1-yl)benzene (18d):

The enantiomeric purity of compound **18d** was determined by HPLC analysis run on a ChiralPak AS-H column eluting in 0.5% 2-Propanol/Heptanes, with a 5.0 µL injection and a 1.0 mL/min flow rate.

HPLC analysis for the racemic compound:

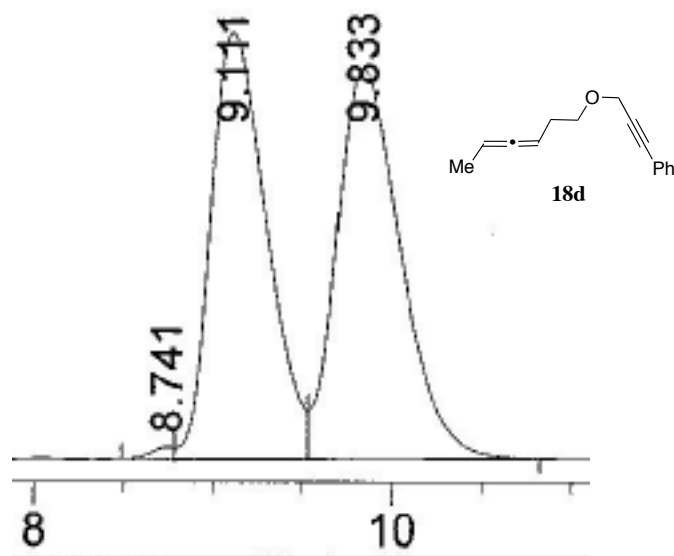

| RetTime<br>[min] | Type | Width<br>[min] | Area<br>[mAU*s] | Height<br>[mAU] | Area<br>% |
|------------------|------|----------------|-----------------|-----------------|-----------|
| 8.741            | BV   | 0.1247         | 30.85120        | 3.57348         | 0.5351    |
| 9.111            | VV   | 0.3354         | 2809.09546      | 130.34499       | 48.7207   |
| 9.833            | VB   | 0.3775         | 2925.77148      | 119.54026       | 50.7443   |



HPLC analysis for the pure chiral compound:

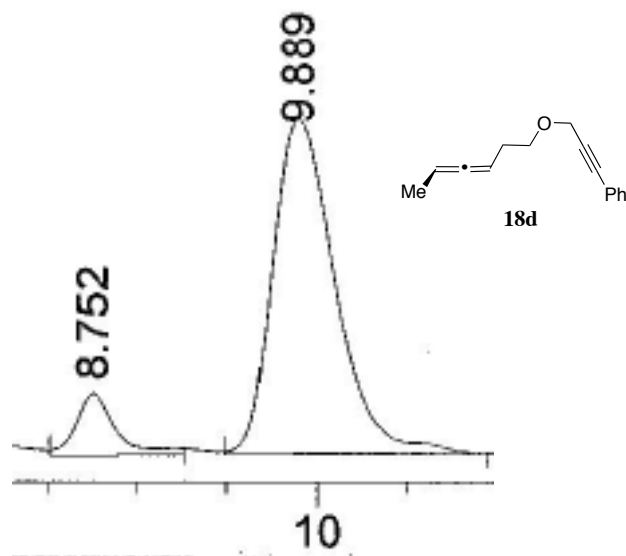

| RetTime<br>[min] | Type | Width<br>[min] | Area<br>[mAU*s] | Height<br>[mAU] | Area<br>% |
|------------------|------|----------------|-----------------|-----------------|-----------|
| 8.752            | VB   | 0.2334         | 198.23923       | 12.75234        | 10.5021   |
| 9.889            | BB   | 0.3564         | 1689.37256      | 71.31681        | 89.4979   |

Compound **18d** has >99% ee. The peaks are visualized at 254 nm, with the racemic compound ( $\pm$ )-**18d** exhibiting equal peaks with retention times of 9.1 and 9.8 minutes, and the enantioenriched compound **18d** exhibiting a major peak with a retention time of 9.9 minutes. The minor enantiomer was not detected (the corresponding peak was below the detection level of the HPLC system).

HPLC analysis for the chiral compound when the reaction was stopped at 50% conversion:

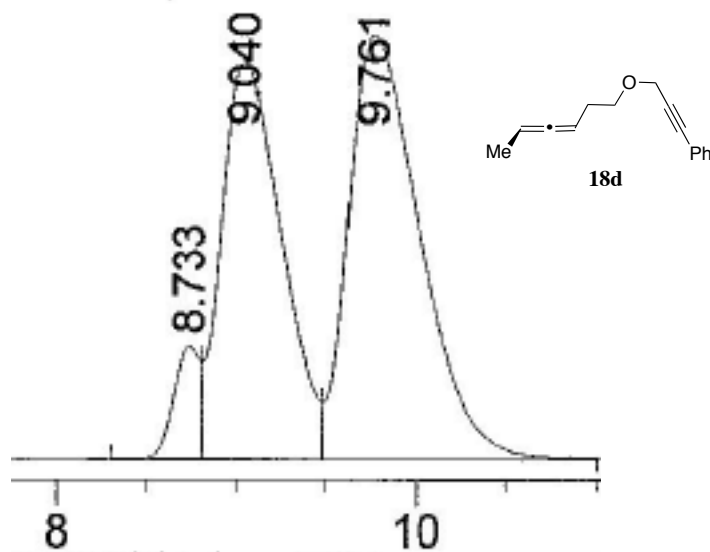

| RetTime<br>[min] | Type | Width<br>[min] | Area<br>[mAU*s] | Height<br>[mAU] | Area<br>% |
|------------------|------|----------------|-----------------|-----------------|-----------|
| 8.733            | VV   | 0.1561         | 684.70691       | 66.53085        | 5.2065    |
| 9.040            | VV   | 0.3655         | 5519.61914      | 235.44983       | 41.9714   |
| 9.761            | VB   | 0.4311         | 6946.57764      | 250.81776       | 52.8221   |

Compound **18d** has 11% ee. The peaks are visualized at 254 nm with enantioenriched compound **18d** exhibiting a major peak with a retention time of 9.8 minutes (minor enantiomer has a retention time of 9.0 minutes).

- For (*R<sub>a</sub>*)-*N*-(but-2-yn-1-yl)-*N*-(hexa-3,4-dien-1-yl)-4-methylbenzene  
sulfonamide (**17c**):

The enantiomeric purity of compound **17c** was determined by HPLC analysis run on a ChiralPak AS-H column eluting in 7% 2-Propanol/Heptanes, with a 3.0 µL injection and a 1.0 mL/min flow rate.

HPLC analysis for the racemic compound:

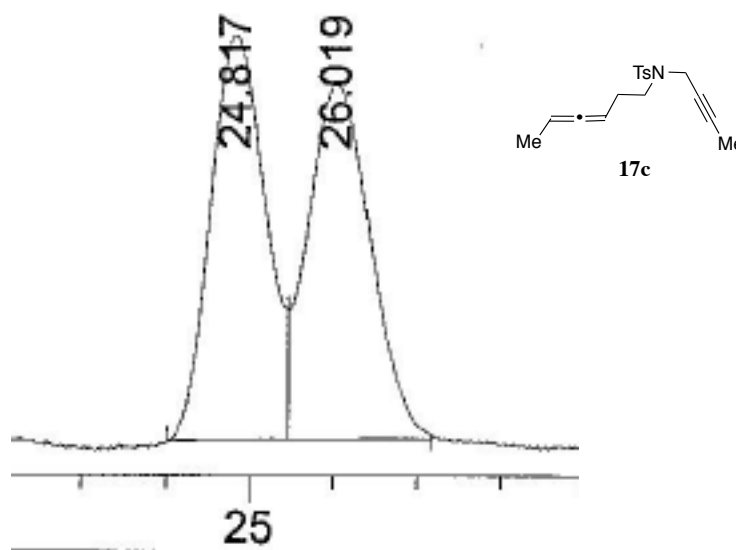

| RetTime<br>[min] | Type | Width<br>[min] | Area<br>[mAU*s] | Height<br>[mAU] | Area<br>% |
|------------------|------|----------------|-----------------|-----------------|-----------|
| 24.817           | BV   | 0.5822         | 552.32684       | 12.06149        | 50.1913   |
| 26.019           | VB   | 0.6404         | 548.11725       | 10.58058        | 49.8087   |

HPLC analysis for the pure chiral compound:

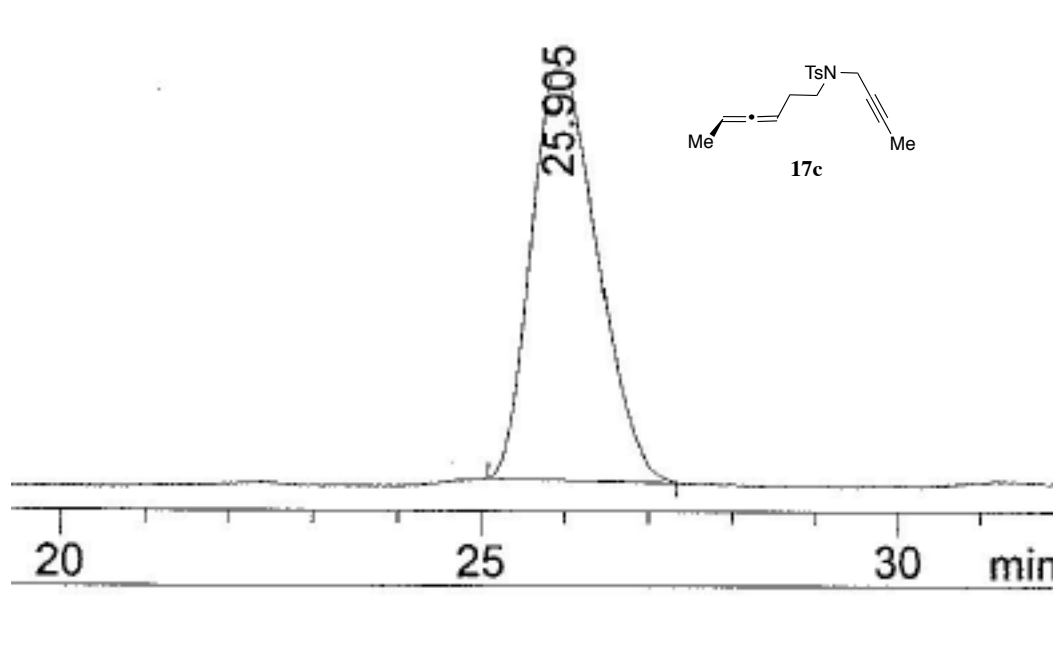

| RetTime<br>[min] | Type | Width<br>[min] | Area<br>[mAU*s] | Height<br>[mAU] | Area<br>% |
|------------------|------|----------------|-----------------|-----------------|-----------|
| 25.905           | BB   | 0.6574         | 1590.09363      | 29.47636        | 100.0000  |

Compound **17c** has >99% ee. The peaks are visualized at 254 nm, with the racemic compound (+)-**17c** exhibiting equal peaks with retention times of 24.8 and 26.0 minutes, and the enantioenriched compound **17c** exhibiting a major peak with a retention time of 25.9 minutes. The minor enantiomer was not detected (the corresponding peak was below the detection level of the HPLC system).

HPLC analysis for the chiral compound when the reaction was stopped at 29% conversion:

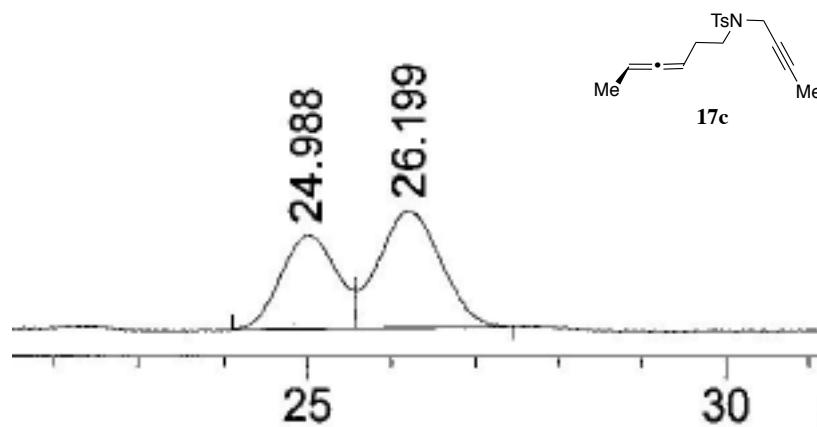

| RetTime<br>[min] | Type | Width<br>[min] | Area<br>[mAU*s] | Height<br>[mAU] | Area<br>% |
|------------------|------|----------------|-----------------|-----------------|-----------|
| 24.988           | BV   | 0.5603         | 480.47360       | 10.22376        | 42.2333   |
| 26.199           | VB   | 0.6302         | 657.19080       | 12.81791        | 57.7667   |

Compound **17c** has 15% ee. The peaks are visualized at 254 nm with enantioenriched compound **17c** exhibiting a major peak with a retention time of 26.2 minutes (minor enantiomer has a retention time of 24.9 minutes).

## Details of Crystal Structure Determination

- X-ray Crystal Structure of (S)-5-(dimethyl(phenyl)silyl)-6,8-dimethyl-2-tosyl-1,2,3,4-tetrahydrocyclopenta[c]azepin-7(6H)-one (35c)

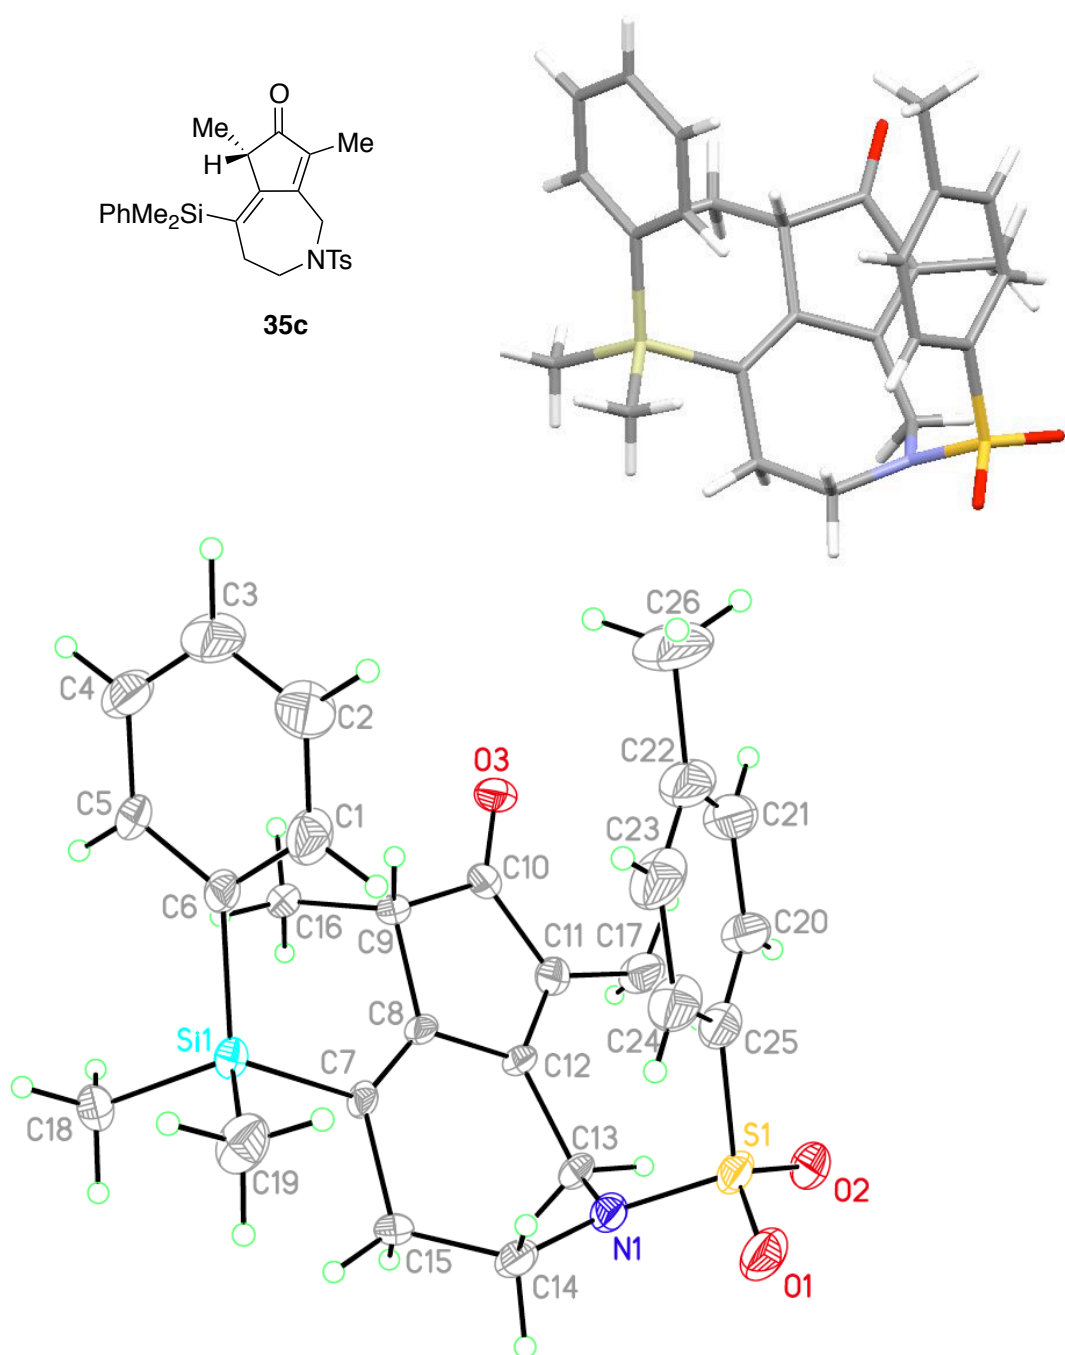

- X-ray Crystal Structure of 6-methyl-2-tosyl-2,3,4,5-tetrahydrocyclopenta[c]azepin-7(1*H*)-one (48).

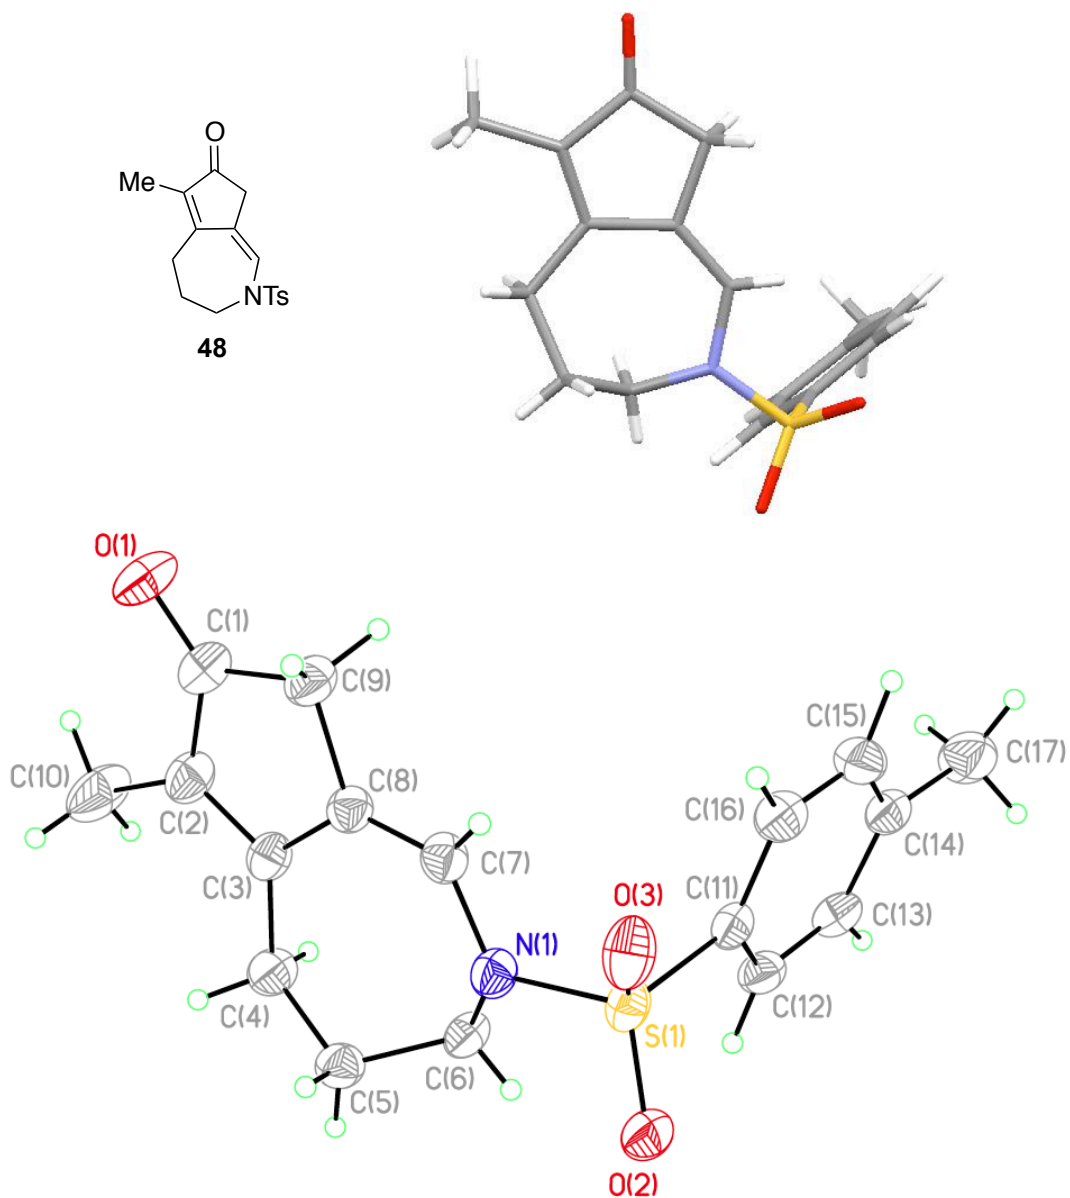

Supplement: Supplementary file 1 [file 4064167]
